# Supplementary material
Source: publisher figshare collection journal article supplement (https://gsajournals.figshare.com/ndownloader/files/24321773)
Supplement: Supplementary file 1 [file 24321773]

>CR1-E_Pass-cAme_a#LINE/CR1
AATGGTTTTAAACTGAAAGAGAGCAGATTTAGATTAGATATTAGGAAGAAATTCTTTGCTGTGAGGGTGGTGAGGCACTGGCACAGGTTGCCCAGAGAAGCTGTGGCTGCCCCATCCCTGGAAGTGTTCAAGGCCAGGTTGGATGGGGCTCTGAGCAACCTGGTCTAGTGGAAGGTGTCCCTGCCCATGGCAGGGGGTTGGAACTAGATGATCTTTAAGGTCCCTTCCAACCCAAACCATTCTATGATTCTATGA
>CR1-E_Pass-cAme_b#LINE/CR1
AATGGTTTTTAACTAAGAGAGTAGGTTTAAATTAAATATTAGGAAGAAATTCTTTACTGTGAGGGTGGTGAGGCACTGGAACAGGTTGCCCAGAGAAGCTGTGGATGCCCCATCCCTGGAAGTGTTCAAGGCCAGGTTGGATGGGGCTCTGAGCAACCTGGTCTAGTGGAAGGTGTCCCTGCCCATGGCAGGGGGGTTGGAACTAGATGATCTTTAAGGTCCCTTCCAACCCAAACCATTCTATGATTCTATGA
>TguERV1_I-cAme#LTR/ERV1
GCAGCTAAGGGGTGGCCAGGGTGTCTCAGAGCTGTTGCAGCAGTGGCAGTGAACATCCAAGAGGCACGCAAGTTCACCCTGGGCCAGAAGATGACTGTGCTAGTGTCCCACACAGTGTCTACAGTCCTGGAAGCGAAAGGGGGGCATTGGCTCTCCCCACAGAGATTCCTGAAGTACCAGGCTATACTGGTAGAACAAGATGATGTTGAGATTGTGGTAACTAACATTGTGAACCCAGCTTCCTTCCTCAGCGGAAGTATGGGAGAACCTGTGATCCATGATTGCCTGGAGACCATCGAAGCCACCTACTCCAGCCGCCCGGATCTGAAGGATACCCCGCTTGAGGATGCTGAGACCTGGTTCACTGACGGGAGCAGCTATGTCATCAGTGGAAAGAGGCATGCTGGGTATGCCGTTACCACAAGCAGAGAGGTAATAGAGTCTGGACCATTACCAACAAATACCTCTGCACAGAAGGCTGAAATAATTGCCTTAATTCGAGCCCTAGAGCTGGCAGAAGGAAAGAAAATTAACATCTACACAGACTCAAGGTATGCATTTGGTGTAGTTCATGCACACGGAGCCATTTGGAAGGAGAGAGGACTGTTGAACTCACAAGGGAAGAATATTAAGCATGCCCAAGAAATACTGAGACTATTAGATGCAGTACAATTACCTGAAGAAGTAGCCATCATGCACATCAAAGCGCACCAAAAAGTGAGCTCTGAATTGGAGGAAGGGAATATGCTGGCGGATAGGGAGGCAAAAGAAGCAGCAAAAGGTGAGATACCTGATGAGACAATTGAGGCAGCATTAATTCCAGATGGAAAAATTTCTATTGAAGGTAAGCCATTATACAATAAAAAGGATAAGAAACTTATCAAGGTAGAGAAGGCAAGTTATAACCAGGAGGGATGGGCTGTAACAGAAGAAGGGAAACTTGTAGTGCCCTCCTATTTGTTGTGGTCATTAGTACAGAGGGAACATGAGAAAACACACTGGGGAATAGATGCCCTGTATAATCATTTGAAAGAAAGAATCATGGCCAGGAAATTACAGGGCACAGTGATACAAGTAACTCGTCAGTGTAGCCTTTGCCTCCAAACTAATCCTAAAAATACCCCAAAGCCTAAAGTGGGACAAATTGGGAAAGGCTGTGGACCTGGGCAACAATGGCAAATTGACTTTACAGAACTGCCCAGGAAGGGAGGGTATCGTTACCTGTTGGTGTTAACTGATACCTTTTCAGGATGGCCAGAAGCCTTTCCTGCTAGGACAGCTAAGGCTCGAGAGGTGACCAAAGCACTGTTGCAAGAAATAATACCACGATTTGGAGTTCCAGCCACCATATCCTCAGATAGGGGGCCACACTTTATTTCAAAAATTGTACAGCAAATAAGTCACCACCTGGGATAGACTGGGAATTGCATACCCCATACCATCCTCAATCTAGCGGCCAAGTAGAAAAAATGAACCATTTGATTAAACAACAAATTGTGAGACTGGGGCAAGAAGCAAATTTGCCCTGGCCCCAGGCTCTTCCATTGGCATTATTGCGAATTCGGACAAAACCAAGGGCAAAAGAGAAGCTAAGCCCTTTTGAAATATTGTATGGAAGGCCATATGCAGTTCAAGAGGGAACAACACCCATTCAAGTAGGGGAAGAAACCCTACATAGATATATGGTGGCCCTAAATAAACAACTTAGAGAAATTGAGAAATATGTGGCTGGAGCTCAAAACAGAGAACTAGATGGGCCAGTACATGATGTACAACCTGGGGATTATGTGTACATTAAGTCTTTTGCAGAAAAGACCTTGGAACCGCAGTGGGAAGGACCATTCCAGGTGCTCCTCACTACCTTCACTGCAATCAAGATCAAAGAACAGAAGGCCTGGATCCATCACTCCCGAGTGAAGAAAGCCCCAGAGGGAACTTGGAAGGTCACACCAGGCGATAGCGAACTGAAGCTGAAGCTCACTCGGAACAACGAATAAATGGACTAATAGTTATTATGGACATTATGTGGAAGGTTGTAACTATTGTAGTAATTACCTTAGCTGTAACAAGAGTGAATGCAATACCACGCAGGTATAATGTGACTGGGATATACCGGTGCCAAGGAAGAGCTTATGACCCTTACTCTCGTAAGGTTTTAAACAAGATGCTAAGAGTCACGAATGCAAGCTTGTGGGAAGGAAGAAATGTTTGGGGATGTAAGTATGCATTCGTGCAGGATGGGTTCCACGAGGCTTACCACCCACCCATGAAACCCATCCAGATCAGTCCTGAATGCTGTGACAAATGCTTGAGTAAATGTCCTCAGTTTAGACTCAAAATAGAGGGGTGTGCAACACAGAGGAGTGAG
>TguERV1_LTR2-cAme_a#LTR/ERV1
TGATTTATTAAAATATGAATATCGATCTAATATCGATACCCAACTGTGACGGACAAAAGACTCTCTAACAGTTAAGTTAGAAAGTGTATGTTTATTGACGGCCGGGCAGCTGCGTGGGATAGCTCCCCAATACGCACTGCAAAGATCACAGGTAATTACAAAGCCTTTTATCCACAAGAATGTTGAATACACAAAATACAAATGCATATTCATACCCTTGTCACCTCCTCTTCTCCGCTTCGTATGCTAATTGACAAAAAGGCTATTAAGCATGCGTAGTTTGTTCTCTGAAATGAGTCGGGGGTCTTATGTGGGGAGTGGTCACCAAAAGGAGGAAGTAAAACTAGTCTTCCTCGTTCTAAACTTTCAACCTTTGATGGATACGTGATAAATGACTCCTTGGAGTTTCCTGTTCCCAAGACTGTTTCTAGAGATAGAGGGTCTGCAATCATCTTGTGTTTTTGGGGTCTATTGATCAATTCCCTTGTTTTTCGTTACAAGCCCAGCTTACACAAACATAAACTTGACAGGCAATGAGTTATTAGATCCGGGATAGCTTATCTAAAATCCGGTCTCTCTCTTAACCATCCTCTGAATTTTAACTGATTTCAGCAAAGCTTATTTTTCCCAGCTAAGTCAGCAATATCTTCAAAATTAGTGTCTCAA
>TguERV3_LTR2c-cAme_b#LTR/ERV1
TGAAATAGAGATTTTTGGAGTTCACTTGAGTTAGCAATATGAATTAAGTATTTAAAGTCTAGCCTGTAGAATTTTGTGTTTTAACCTTTTTACTTAAACCTCTGCCATGGTACAAAGGGCATAGGAAAATGCAAATTTCTGAAGCTTCTTGCATAAAGAACAATACCGAGGAGACCAAGGGATGCAAAGAACCCAGATAAAGGGACTCCTCTGCCTCCAAATGGATTAAGGCCGACAGACGTACTCAGATAAGCACCAAGGGACCAAAAGCGCACGCGCAAAGGAGAAAAGTTCAAAAGTTCAGTCATGAGGAAGACCACAATCTTCAGCCTCAGAGACCACCAGAGACCCCTGTGCGACCACCACAGCAAACAACGCATGCCCAGAAGGGCGTGGATCTAATTACCATGCGAGGCGAGGACAGGCGGGACCAGGGGTTGAATATGCATGGAAAGGTTGTGCAATGTATTGCATATGGAACATCTTTGTGAATAAAGATGTGGGTCAGACTGAGGCTCGGGGCACAAGTTTTCACGAGAGCTATCTCACTTGTGCCGGGCGCCACATACATACCCACTTCATAACTATATACCTAGTTGTGGAGTCTATTTATTCCGCGTATCGCTTCA
>TguERVK6-cAme#LTR/ERV2
ATTCCCCTTCATCCAGATGATGCACCTCGATTTGCATTTTCCGTCCCAAGCATCAATAGACAAGAGCCTTTGCAAAGATATCATTGGGTTGTCTTGCCCCAAGGCTTGAAAAACTCACCAACCATCTGCCAATGGTATGTGGCTCGAGCGTTGTCTCCAGCGCGAAAAAAATATCCAAGAGCAAAAATCATTCATTATATGGATGATTTGCTCATTGCAGCGTCAACATCACAAGAACTGCAAAAAGCGCGTGATTGTGTGATTTCAGAAGTGCAAAAGGCCGGACTGGAAATCAGTACTTCAAAAATTCAAGAAATCGCACCATGGAAATATCTGGGATGGAAAATGACAGAACAAACAATAAGACCTCAGAACATAGAAATCAGTTCAGAAATCAAGAGCTTGCAAGATTTGCAGCAACTCTTGGGGGAGATCAACTGGATGAGACCAATCCTGGGAATGACGAACGACGATCTTGCACCGTTGTTCAATCTCTTAAGAGGAGACAGTGATATCAAATCTCCCAGAACTCTCACAAAAGAAGCACAAAAAACTCTTGAGAAGATTGCAGAGATCATCCAAAGAAGACAAGCACATCGTTGTATCACCTCACTACCTTTCTATTTAGCAGTGTTGGGGGAAGAAATTCAATTGTATGGCCTGATTTTTCAGTGGGATCCGTCTCTAACTGACCCGCTCTTGATTATAGAGTGGATTTTTTTATCTTACAGATCTCCGAAAACAATCCTCACAAATCTAGAAATGATCGCACAAATCGTGATGAAGGCAAGAACACGGTTACTGACAATGTCGGGAAAAGATTTTTCGACAATTTATCTGCCGCTGAAAAAACAATATTTTGATTGGGCGATGCAAAAATCCAAAGACCTACAAATAGCATTATTGGATTACCCTGGCACTTGCACAGTTCATTTTCCAACACATAAATTGTTAAAAGCAAAAATAAGCTTTAGGGAAAAGCCAAAGCTGAGTGAGGAACCATTGAATGCAATAACATTGTTTACCGATGGTTCAGGAAAAACACACAAATCAGTAATCACGTGGCAGGATCCAATAACAGGAAAATGGGAATCAAATATAAAAATAGTGCAGGGATCGCCACAGATAGTGGAATTGGCAGCGGTAACCAGAGCCTTCGAGATATTTCAACAGCCTTTCAATCTGATCACAGATTCGGCATATGTTGCGAATGTGGTCAAAAGATTGGAAGGGTCGCTTTTGAAAGAAGCGGATAATGAGATTTTATACTCATACTTACTAGGTATGAGGACTTTGTTAAACGACAGAAAGCATAAATATTTTATTACTCATATTAGAGCACACTCCTCCCTTCCAGGATTTTTAGCGGAAGGAAACGCTATAGCAGATAAGCTAACAATGCCTCTTTCACAGACATTGCCGGATATTTTTGAGCAGGCGAAACTAAGTCATGCATTTTTTCATCAGAATGCACAAGCGCTGATGGAATCCTTTCGCATTTCCAAGAGTCAAGCGAGGGAAATCATTAGTGCCTGTCCAGACTGTCAGCTTGTACAACCACCTGCATCTACAGGGGCTGTCAATCCTAGAGGATTGCAAAGCCTTCAGTTGTGGCAAGCTGATGTCACAAAATATCCATCTTTTGGAAAGCTCAAAAATATCCATGTCTCAGTCGACACGTTTTCTGGAGCAGTTTTTGCATCATTACATACAGGAGAAACCGCGCAACATGCTTGCCGACATTTTTTACAAGCATTTGCATCATTAGGGGTTCCACAGGAAATAAAAACAGACAATGGTCCAACCTACACAGGTAAAGTGCTTGACCATTTCTTGAAGAAATGGGGTGTCAAACATACTTTTGGCATTCCTCACTCTTCCACGGGTCAAGCAATCGTAGAAAGAACACATCATACCCTGAAATCCCTTTTGGATAAACAAAAAAGGGGGGAGGCAGAGGCAACGCCTCACATGCGGTTGAATAAAGCTCTATACGTGTTGAATTTTTTGAATGGTTCCTTTTTGGAACCCACTCCACCAATTATGAGGCATTTTTCAAACAGTGCACAAGCAAAACTAAAGGAAAATCCTTTAGTTTTGGTGCGGGATCCAGAGACAGGACGGATTGAAGGTCCTTTCAAGTTAATAACTTGGGGCAAGGGTTATGCTTGTGTCTCCACAGATCGAGGATTGAAGTGGGTTTCGGCGAGACACGTAAAACCTTACCGAACCCAGACACAGATAAGCATTAGCCCTGAAAGGAAAGAAGAGAGCACGCAGACGTGAAGAAGACCGAAAACCGCGGGCATCTCTTCAATCAAGAATTGAAAATTTCTTTTGGACTTGGGTGTGGCATTGCAAGAGTTCCCATCGGGGGGGGAATCATGGGCTTGAGGTTCAAACAGATGTTGTTCTGGTGCCTCATTTTTTCATCAATTGCCTCAGGCAATGCAGCAGAGTTGCCTGTGATTCAACCAAAAGAGAACGTTTGGGAAATTTTAGCCGATGCAGCAGGCTTGGATACCATCTGTTTGACACACTCTAAGCCAAGGAAACCATTTTCAACATGTTTGGTGGGTTTGCCAACAAATGAATGGCCGATCCCAGAAAACATCCCTCCAGAGGTTTCGAAAGTAATTACGAATCCTGTGGACGGATGGCATGTTTGGACACAATTTCTTCCTGTAGCTCCTTTTGAACCTCAGGAGCTGGAAATTCTTGGGTCCGTAAAAATGGAATTCTGTATAAAATTTAGCTTTTCGGAAGTGCCAAAGACAAAGGATAAAACAGTAAATGTTACCCCAAATAATTTCATTTATCAAAATGAGTCTTCTTGGTGCAATTACACCAAGGTGTCAAACAGACCATCATCCCAGGTTCCGGCGCAATTGCCACGAGGACTCTTTTTCATTTGTGGGGACAGAGTTTGGCCTGCTATCCCTGCAAATGTCAAAGGTGGTCCATGCAGCATTGGACGACTTTCATTGTTAACACCAGATTTGGCATTGTTGAAAGAACAAAAACGTAGAGAAAAAAGGGTGGTGAAACAGTATGATCCAAATTGTGATGATAATATTCACACATGGGACAAGGCTCGGAGAATTGCGGTTGCAATATTCTCACCCCAAACAGCATCAGGAGTAGCCTTGACTCAGTTGGATCAAATGGGTTGTTGGTTGAGTAAACATGCTCGTGCCACCTCTCTTGCACTGAGTGACATGTTAACGGATGTTGACAGTGTAAGACGAGCGACTCTTCAGAACAGAGCGGCAATCGATTATTTGCTGCTGTCGCACGGGCACGGATGCAAAGAATTTGAAGGGATGTGCTGCATGAATCTCTCTGACCACTCGAAATCAATCCATGAAAATATAAAGCAATTGCGAGACGGTATAGCCAAACTTGGAGAAGTTACGGGATCTTGGATGGATGGTGTGTTTGAATTTTTTAATCTTTCACCATTGTGGAAGGAACTTTTGAAAATGGCTTTCTGTATTTTAATAGGGTTTGTAATTCTTCTTCTCCTTTTGCCATGCATTTTTCAGTGCATGCAACGGGTCATGAACAGGGCCGTCAAACGGGTGTTTTTGGTGCAAACAGAAGGGGGAGATGTCGGAGTCCAGAACACTCCTCTGACTGTCCTGAGAGATTCCAGACCCGAGCAGGGGGCTGGGAAGCCTTGGCAAGGAGTCAAAGACTCCTGCGGCTTTGATTTTAGCCCCTGGGAGAAATTACCACCATTGTGTGAAGAATTACAGACCACGGGAGTTTAGATAGGGTGATAATTAGCTACACACCGGGTGAAAAGTAGATTTATGTAATGTTTAGGTTAATGGGCAAAAAACACAAAATGGAGTCTCCACGTGGCTTTGGGGTTTCTTCCTTCTTCTTCGTCTTCTCCATTTTCCTCTGTATCATGGGCATCTTTGGTTGGCTCAGAACAGAGTCCTACCTTCTAACACGGGAGACAGGTATTGGGGATCTTTTGTAAATATAGTATACGTAGTTTGTGGTATAAAGATAATCGTCACCTTCGGGGCTGGGCCTTTTCCCCGTGAGCTGACCTGCAGAACAGATCTCTGTGGGTCGGAGAAGAAACTGTACTGATAAGGGAAAAATAAACAGCCTTGAAGAAGCAGAGGAGACGGCTCTCAGTTTTTTTTTCTTTTTTCTCGGTGCTGGGCAAAAGACTTTTACACTCTCGGGAAGAACAACATCACATAAAAACCCGAGA
>TguERVK9_LTR2f-cAme#LTR/ERV2
TGTCGCACTACGACACGAAATGAACACACGCACTCACTACAACTCTCTTCGCAAAGAAAGGAGGAAAAGAGGAAGTTTATTGTGTGACCTCGATATATATACCATTCCAAAGGTGACCAGGGATTGGAGGGTGAAGTTGCCACCTCTCCAACCACACTGGTCAAACCAAGAGTCCATCAATTCTCGCTTCCTCTAGAAAGGAATGCAAAACAATCATTGTTTACATGAAAGTGCGTGAGAACTCCACTACAAGAATGCAAAACATCAGAAGGCTAAGAAAAACTTTCAAAGATCAGGGCGACA
>TguERVL2_I-cAme_a#LTR/ERV3
TGTTGGGGGTTGGGTTGATTTCTTATAGAATTTTTTCCCAGAAGTTGCTAAGAAGCTAATGGCTGGGTGCTTTTCGGTACTTATGGGTGCTCAGGAACAAACAAAGGAAGCAGCTACACAGAGACATTGATTTCACTTCGCTCGGGGCAGTTTTCTGCTCTGGGGGGACGGCCAGGGCTGCTCGTCTCGGCGAGGGGAGAGCTCTCACCTTTCCCTTCACCTCGGACTCCGTCGGACCACCGTCTCTTCGTGTGTCCCCCGGGATTTTGGGAACCCGTTTCCTCCCTGCCCTGCACCCACGTTTCTTCAGTTCTGCTCGAGGTCTCCCCACGCTGTGTTTCTACAGCCCCTGCCAGCCGGGACACTTTTCCAACAGCTCCAGCCACTGTGAACCCTCGGAAACATCTCATCCTCCTAGAGCTGCTGCTAGTCTATTTGCTTGTGACGGTACTGAGGGGGGGGGGGGGGTACCAGAGGAAAACTGTGACTGGCTTGTTGTTTTTTTTTTTTTTTCTCCTCTAGTTCTGTTTGTTGTCAATATTGTAATTATTGTTAATTTACCTTGTTAGACTAACTAGTAAAGAACTGTTATTCCTACCCTCCTTATCGTTGCCTAAGACCTCCCCTTCAATTTTGGAATTATAACAAACTCCAAGGGAAGTTTCCCTTTTCTTTGGCCCCTGTCTTTCCAAACCAAGACAGATTTTGGCGCCCAACGTGGGGCCTGAGGACATCGAGAGAAAAAGGGTTAAAAAGGAATAACAGTTCGAGTAATCTAATTTTTTGTGTGCTGAATTTAAGAACTTCATTAAGTAGAACAATGTTGTCTAGTGTACCCAGGTTTGGATGGCACGTGGCCACAGCTATATTTCTTCCATTTGTAGCCCCTTATCTAGACATGGGTCCCATAACTAAAGCTACCGTGGCTGTTATCGAGTTTATTTTGTGGGTTGATAATGTGAGGAATTCCTGGATTTTTAACTTCCTCTGGAAGGCAGGCTCATTGATCCAGAGCTATCGCATACTAACTGAATGTTTTTGGGGTTACTTTAATAATGGCACCTACTGTGAAGAAATGACACCGGGGGAAATTTTCTCCCAACCCTTCACCTGGCTCTTTGGGTCTACCCCACCAGTTTTCGAAGGGTTCACATTTTCTCGGTATGCTAATGATGTCATGCAGTGGCTGGTGCTGCTGACAGGCCTGCTCTATTTAGCATTCAGAGATAAGGGGAAATTGACTTGGATAACCACCCTGATACCTACCCCAGAGAACAGGGATACTGCCAGACAGCCTGACAGTGCCACAGAACCTGACCCTGCCCCACAGACCACCTCAGAAACAAACCAGCCGGATTGGGTGGGGGTTCTGCTGAAAAAGATAGGCCAGATGCTGAAGGAGCACACCTCCCCCACTAGTGAGAAGCCCTCCTGCTGCCTCAAAAAGGAAGACTCTTGTGGTGCAGCAGTGGAACCCACAGATGTTACATCTGTCCAGGCTCCAGCTGAACCACAAGGGAAATCACAGCCAGCAGCAGTCGCCCCTGTGGAAACTAGAAAGTCTAAGATGAAATCAGATAAGAAAGGAGGGACCTCACAACATGCAGGGGAGCCAGAGGTAGAGATTGTCACTGAGTCTCTGTCCTATGAAAGTCTCCGTAACCTGCGGAAGGACATTGTACGACGGGGACGTGAGGCTTATACAACCTGGTTACTCCGGGTCTGGGACCTTATGGGTACAGGTGTGCAGCTGGATGGTACTGAGGCCAGGAATTTGGGACCTTTGACCCAAGACTCAGGTGTGGATCAGGTATTTGTAAGGGAGCCTGGGCCCCTTTCCCTCTGGGAGCGTCTTTTAATGAGTGTAAGAGAAAGGTTTGTCCACAGAGAGAGAATGCAGGAGCACCATCATAAGCTGCGCTGGAAAACCCTCGAGGAAGGGATCCAACAGCTGAGAGAAGTGGCGGTGCTAGAAGTACTCTTTGGGAGGGGTGGACAGCACGATAATGACCCCGACAAAGTCAGGTGCACAGGGCAAATGTTGTGGAGTCTGGCAAATCTAGGGCCAGCTCAATACACCACCTTCATTGCAACAATCAATGCAGATAACAACCGAGAGACAGTGGGTTCTGTGGCCAACAAGCTTAGGAATTATGAAAGTATGGTCAATGGCCCGATGCATGCTCATGTCTCTGCTGTGGCTAAAGAACTTAGAGAGGAGATGAGGGAGATGAGGGAGGAGATGAGGAAGATCAACACAGCACCAGTGCGAGTCACAGGCCCCAAAGTCAAAGTCCAACATTCCCCAGCTAAAGAAAGAGGATACACCCCACGAGCTGACTTGTGGTTCTTTCTGCGTGACCATGGGGAAGACATGGGAAAGTGGGATGGGAAACCCACTTCTGTCCTGGCAGCACGGGTGCGTCAACTCAAGGAGGGAAACAGTAATCGAGGGGGTTCCACAAAAATGAAGGTAGCCTCAACCTCCCAGGACCGATCTGCCGGGTATTACAGAAGGGAAGATGATTTGTCAGACCCCCTTGAAGGAACCTCTACTATGTATGCTCAAGAAGAAAATAATAACCAGGGTTAGAGGGGCCCTGCCTCTAGCCAGGAAGAGGCACGGGAGAACCGGGTCTTTTGGACAGTGTGGGTCAGATGGCCTGGCACATCAGAGCCACAAGAATACAGAGCGTTGGTTGACACTGGTGCACAATGTACACTGATGCCATCGAGGCATGTAGGGACAGAACCTGTTTCTATTGCCGGGGTGACAGGGGGATCACAGGAATTTACTTTGTTGGAAGCTGAGGTGAGCCTGACCAGGAAAGAGTGGCAAGAACACCCAATTGTGACTGGCCCAGAGGCCCCGAGTATCCTGGGCATGGACTACCTCCGGAATGGCTATTACAAAGACCCAAAAGGACTCAGGTGGGCTTTTGGAATAGCTGCTGTGGAGACAGAGAGCATTAAGCAGTTGAACACCTTGCCTGGTCTGTCAGAGAACCCATCTGCAGTAGGACTCCTGAAGGTGGAAGAGCAACAGGTGCCAATTGCCACCTCAACAGTGCACCGCCGGCAGTACCGGACGAATCGAGATGCCGTGATCCCCATCCACAAAATGATCCGTGAGCTGGAGAGCCAAGGGGTGGTCAGCAAAGCACACTCACCCTTCAACAGCCCTATTTGGCCTGTGCGCAAATCTGAAGGAGAATGGAGATTGACTGTGGACTATCGTGGCTTGAATGAAGTGACTCCACCACTGAGTGCTGCTGTGCCAGACATGCTGGAACTCCAGTATGAGCTGGAGTCCAAGGCAGCGAAATGGTATGCCACTATTGACATTGCCAATGCGTTTTTCTCCATTCCTTTGGCAGCAGAATGCAGGCCTCAGTTTGCCTTCACGTGGAGGGGAGTGCAGTACACCTGGAACCGACTGCCCCAGGGGTGGAAACACAGTCCCACCATCTGCCATGGACTGATCCAGGCTGTACTGGAAAAGGGTGAAGCTCCAGAACACCTGCAATACATTGATGACATCATTGTGTGGGGGAACACGGCAATGGAGGTATTTGAGAAAGGCGAGAAGATCATCCGGATTCTGCTAGAAGCTGGTTTTGCCATCAAGAAGAGCAAAGTCAAAGGGCCCGCTCGAGAAATCCAGTTCCTGGGGGTGAAGTGGCAAGATGGACGGCGTCAAATTCCCACTGAGGTCATCAATAAGATCACTGCGATGTCTCCACCAACCAACAAGAAGGAGACACAAGCTTTCCTAGGCGCCATAGGTTTTTGGAGAATGCACATTCCAGAGTACAGTCAGATCGTGAGCCCTCTCTACCTGGTTACCCGTAAAAAGAATGATTTCCACTGGGGCCCTGAACAGCAACAAGCCTTCTCCCAAATCAAGCAGGAGATCGCTCATGCAGTAGCCCTTGGCCCAGTCAGGACGGGACCAGAGGTGAGGAATGTGCTTTACTCTGCAGCCGGGAGCCATGGTCTGTCCTGGAGCCTTTGGCAGAAAGTGCCTGGAGAGACTCGAGGACGACCGCTGGGATTCTGGAGCCGAAGCTACAGAGGATCTGAAGCCAACTACACTCCCACAGAGAAGGAGATCTTGGCTGCCTATGAAGGAGTCCAAGCTGCCTCAGAGGTGATTGGGACAGAAGCACAACTCCTCCTGGCACCCCGACTACCAGTGCTGGGGTGGATGTTCAAAGGAAAGGTTCCCTCTACCCACCACGCCACTGATGCCACATGGAGCAAATGGATCGCTCTCATCACGCAGCGCGCCCGTATTGGAAACCCAAATCGCCCTGGGATTTTAGAGATAATTACGAACTGGCCTGAGGGTGAAAAATTTGGTCTCACTGATGAAGAGGAGCAGGAACAGGTGCCACGTGCTGAAGAAGCTCCACCGTACAACCAGCTACCAGCAGAAGAAAAACGCTACGCTCTTTTCACTGATGGTTCCTGTCGCATTGTAGGGATGAACCGGAAGTGGAAAGCAGCTGTGTGGAGCCCCACACGACAGGTAGCAGAGGCTACTGAAGGAGAAGGGGGATCAAGTCAATTTGCCGAGCTCAAAGCCGTTCAACTGGCTCTGGACATTGCTGAGAGAGAGAGGTGGCCCAAGCTCTACCTCTACACTGACTCATGGATGGTAGCCAATGCTCTGTGGGGGTGGCTGGAACGGTGGAGAAAGGCCAGCTGGCAGCGTAGAGGGAAACCAATCTGGGCTGCTGAGGAGTGGAAAGACATTGCCACTCGAGTAGAGAAGCTCCCTGTAAGAGTTCGTCATGTAGATGCCCATGTCCCCAAGAGCCGGGCTAATGAGGAGCACCGACATAATGAGCAGGTGGATCATGCTGCAAAGATAGAAGTGGCAAAAATAGACTTAGATTGGGAACACAAGGGAGAGTTGTTCCTAGCCCGATGGGCCCATGATGCCTCAGGGCATCAGGGTAGGGATGCCACCTATAAGTGGGCACGAGACCGAGGGGTGGATCTAACCATGGACAGTATTTCACAGGTTATCCACGACTGTGAGACGTGTGCTGCCATCAAACAGGCCAAGAGGCTGAAGCCCCTCTGGTACGGTGGGCGGTGGTCCAAGTACAAGTATGGGGAGGCCTGGCAGATTGATTACATCACACTGCCCCAAACCCGCCAAGGCAAGCGCTACGTGCTGACCATGGTGGAAGCCACCACTGGATGGTTAGAGACCTACCCTGTGCCTCATGCTACTGCCCGGAACACCATCCTGGGCCTGGAAAAGCAGGTCCTGTGGAGGCATGGTACCCCTGAGAGGATTGAGTCAGACAATGGGACTCATTTCAAAAACAGCCTTATTAACACCTGGGCTAAAGAACATGGTATTGAGTGGGTGTACCATATTCCTTACCATGCACCAGCAGCTGGGAAAGTTGAACGGTGCAATGGCCTGCTGAAAACCACCTTAAAGGCACTTGGTGGGGGGACTTTCAAAAACTGGGAGATTAATTTAGCAAAGGCTACATGGTTAGTGAACACCCGAGGTTCCACTAACCGAGCAGGCCCTGCCCAGTCTGAAGCCTTGGGAACAACAGATGGAGATAAAGTTCCAGTGGTACACATGAGAGGTATGCTAGGAAAAACGGTTTGGGTTAATTCTGCCTCCAGCAAAGACAAGCCCATCCGTGGAGTTGTCTTTGCTCATGGACCAGGCTGCACCTGGTGGGTCATGCTGAGAGATGGAGAGACTCGATGCATACCTCAAGGGGATCTTGTTTTAGGGTAAGCTACTCATGACACTGTGCCTGTATCTGTAGCTGCATGTATATATGTATATAATTAAGGTATTGCATGTATGTACATAATTTTAAAGTTTAAATTTGATGTAACATATTGGGGTGGGAAAAAATTCGGGGTGGATAATGTTGGGGGTTGGGTTGATTTCTTATAGAATTTTTTCCCAGAAGTTGCTAAGAAGCTAATGGCTGGGTGCTTTTCGGTACTTATGGGTGCTTGGGAACAAACAAAGGAAGGCAGCGACACAGAGACACTGACTTCACTTCGCTCTGGGCAGTTTTTCTGCTCTGGGGAAACGGCCAGGGCTGCTCGTCTCGGCGAGGCAGAGAGCTCTCACTTCCTTCACCTGGAACTCCGTCGGACCACGGTCTCTTCGTGTGTCCCCCGGGATTTTGGGAACCCGTTTCCTCCCTGCCCTGCACCCACAGTTTCTTCAGTTCTGCTCGAGGTCTCCCCACGCTGTGTTTCTACAGCCCCTGCCAGCCGGGACACTTTTCCAACAGCTCCAGCCACTGTGAACCCTCGGAAACATCTCATCCTCCCAGAGCTGCCGCTAGCCTATTAGCTTGTGACGGTACTGAGGGGGGTGGGGGTTACCAGAGGAAAACTGTGACTGATTTGTTGTTGTTTTTTTTTTCTCCTCTAGTTCTGTTTGTTGTCAATATTGTAATTATTGTTAATTTACCTTGTTAGACTAACTAGTAAAGAACTGTTATTCCTACCCCCTTATCGTTGCCTAAGACCTCTCCTTAAATTTTGGAATTATAACAAACCCCAAGGGAAGTTTCCCTTTTTTTTGGTCCCTGTCTTTCCAAACCAAGACA
>TguERVL2_I-cAme_b#LTR/ERV3
TGCGTTTTTCTCCATTCCTTTGGCAGCAGAATGCAGGCCTCAGTTTGCCTTCACGTGGAGGGGAGTGCAGTACACCTGGAACCGACTGCCCCAGGGGTGGAAACACAGTCCCACCATCTGCCATGGACTGATCCAGGCTGTACTGGAAAAGGGTGAAGCTCCAGAACACCTGCAATACATTGATGACATCATTGTGTGGGGGAACACGGCAATGGAGGTATTTGAGAAAGGTGAGAAGATCATCCGGATTCTGCTAGAAGCTGGTTTTGCCATCAAGAAGAGCAAAGTCAAAGGGCCCGCTCGAGAAATCCAGTTCCTGGGGGTGAAGTGGCAAGATGGACGGCGTCAAATTCCCACTGAGGTCATCAATAAGATCACTGCGATGTCTCCACCAACCAACAAGAAGGAGACACAAGCTTTCCTAGGCGCCATAGGTTTTTGGAGAATGCACATTCCAGAGTACAGTCAGATCGTGAGCCCTCTCTACCTGGTTACCCGTAAAAAGAATGATTTCCACTGGGGCCCTGAACAGCAACAAGCCTTCTCCCAAATCAAGCAGGAGATCGCTCATGCAGTAGCCCTTGGCCCAGTCAGGACGGGACCAGAGGTGAGGAATGTGCTTTACTCTGCAGCCGGGAGCCATGGTCTGTCCTGGAGCCTTTGGCAGAAAGTGCCTGGAGAGACTCGAGGACGACCGCTGGGATTCTGGAGCCGAAGCTACAGAGGATCTGAAGCCAACTACACTCCCACAGAGAAGGAGATCTTGGCTGCCTATGAAGGAGTCCAAGCTGCCTCAGAGGTGATTGGGACAGAAGCACAACTCCTCCTGGCACCCCGACTACCAGTGCTGGGGTGGATGTTCAAAGGAAAGGTTCCCTCTACCCACCACGCCACTGATGCCACATGGAGCAAATGGATCGCTCTCATCACGCAGCGCGCCCGTATTGGAAACCCAAATCGCCCTGGGATTTTAGAAATAATTACGAACTGGCCTGAGGGTGAAAAATTTGGTCTCACTGATGAAGAGGAGCAGGAACAGGTGCCACGTGCTGAAGAAGCTCCACCGTACAACCAGCTACCAGCAGAAGAAAAACGCTACGCTCTTTTCACTGATGGTTCCTGTCGCATTGTAGGGATGAACCGGAAGTGGAAAGCAGCTGTGTGGAGCCCCACACGACAGGTAGCAGAGGCTACTGAAGGAGAAGGGGGATCAAGTCAATTTGCCGAGCTCAAAGCCGTTCAACTGGCTCTGGACATTGCTGAGAGAGAGAGGTGGCCCAAGCTCTACCTCTACACTGACTCATGGATGGTAGCCAATGCTCTGTGGGGGTGGCTGGAACGGTGGAGAAAGGCCAGCTGGCAGCGTAGAGGGAAACCAATCTGGGCTGCTGAGGAGTGGAAAGATATTGCCACTCGAGTAGAGAAGCTCCCTGTAAGAGTTCGTCATGTAGATGCCCATGTCCCCAAGAGCCGGGCTAATGAGGAGCACCGACATAATGAGCAGGTGGATCATGCTGCAAAGATAGAAGTGGCAAAAATAGACTTAGATTGGGAACACAAGGGAGAGTTGTTCCTAGCCCGATGGGCCCATGATGCCTCAGGGCATCAGGGTAGGGATGCCACCTATAAGTGGGCACGAGACCGAGGGGTGGATCTAACCATGGACAGTATTTCACAGGTTATCCACGACTGTGAGACGTGTGCTGCCATCAAACAGGCCAAGAGGCTGAAGCCCCTCTGGTACGGTGGGCGGTGGTCCAAGTACAAGTATGGGGAGGCCTGGCAGATTGATTACATCACACTGCCCCAAACCCGCCAAGGCAAGCGCTACGTGCTGACCATGGTGGAGCCACCACTGGATGGTTAGAGACCTACCCTGTGCCTCATGCTACTGCCCGGAACACCATCCTGGGCCTGGAAAAGCAGGTCCTGTGGAGGCATGGTACCCCTGAGAGGATTGAGTCAGACAATGGGACTCATTTCAAAAACAGCCTTATTAACACCTGGGCTAAAGAACATGGTATTGAGTGGGTGTACCATATTCCTTACCATGCACCAGCAGCTGGGAAAGTTGAACGGTGCAATGGCCTGCTGAAAACCACCTTAAAGGCACTTGGTGGGGGGACTTTCAAAAACTGGGAGATTAATTTAGCAAAGGCTACATGGTTAGTGAACACCCGAGGTTCCACTAACCGAGCAGGCCCTGCCCAGTCTGAAGCCTTGGGAACAACAGATGGAGATAAAGTTCCAGTGGTACACATGAGAGGTATGCTAGGAAAAACGGTTTGGGTTAATTCTGCCTCCAGCAAAGACAAGCCCATCCGTGGAGTTGTCTTTGCTCATGGACCAGGCTGCACCTGGTGGGTCATGCTGAGAGATGGAGAGACTCGATGCATACCTCAAGGGGATCTTGTTTTAGGGTAAGCTACTCATGACACTGTGCCTGTATCTGTAGCTGCATGTATATATGTATATAATTAAGGTATTGCATGTATGTACATAATTTTAAAGTTTAAATTTGATGTAACATATTGGGGTGGGAAAAAATTCGGGGTGGATAATGTTGGGGGTTGGGTTGATTTCTTATAGAATTTTTTCCCAGAAGTTGCTAAGAAGCTAATGGCTGGGTGCTTTTCGGTACTTATGGGTGCTCGGGAACAAACAAAGGAAGCAGCTACACAGAGACATTGATTCCACTTCGCTCGGGGCAGTTTTTCTGCTCTGGGGGGACGGCCAGGGCTGCTCGTCTCGGCGAGGCGGAGAGCTCTCACTTTTCCCTTCACCTCGGACTCCGTCGGACCACCGGTCTCTTCGTGTGTCCCCCGGGATTTTGGGAACCCGTTTCCTCCCTGCCCTGCACCCACGGTTTCTTCAGTTCTGCTCGAGGTCTCCCCACGCTGTTTCTACAGCCCCTGCCAGCCGGGACACTTTTCCAACAGCTCCAGCCACTGTGAACCCTCGGAATCATCTCACCCTCCTAGAGCTGCCGCTAGCCTATTTGCTTGTGACGGTACTGAGGGGGGTGGGGGGGGGTTACCAGAGGAAGAACTGTGACTGACTTGTTGTTTTGGTTTTTTTTTTCTCCTCTAGTTCTGTTTGTTGTCAATATTGTAATTATTGTTAATTTACCTTGTTAGACTAACTAGTAAAGAACTGTTATTCCTACCCTCCTTATCGTTGCCTAAGACCTCTCTTTCAATTTTGGAATTATAACAAAACCCAAGGGAAGTTTCCCTTTTTCTTTGGTCCCTGTCTTTCCAAACCAAGACA
>TguERVL2a2-LTR-cAme_a#LTR/ERV3
TGTTGGGGGTTGGGTTATTTTCTTATAGAATTTTTTCCCAGAAGTTGCTAAGAAGCTAATGGCTGGGTGCTTTTCGGTACTCATGGGTGCTTAGGACCAAACAAAAGAAGCAGCTAAGGCAGAGACAGGGAGGCACCGTCTTCACTTCGCTCTGGGCAGTTTTCTGCTCTCGGGAGAACGGCCAGGGCTGCTCGTCTCGGCGCGGCAGAGAGCTCTCACCATCCTTCACCTGGAACTCGGTCGGACCACCGTCTCTTCGTGTGTCCCCCGGGATTTTGGGAACCCGTTCCCTCCCTGCCCTGCCAGGAGCTCCTTCTCCCTGCCCTGCACCCACGGCTTCTTCAGTTTTGTTCGAGGTCTCCCCACGCTGTATCTTCTGCAGCCCCTGCCCAGCCGGGACACTTTCCAACAGCTCCAGCCACTGCCAACCCTCGGATACATCTCATCCTCCCAGGACTGCTGCTGGCTCTGGTAGCTTGTAACGGTACTGAGGGGGGTGGGGGGTGCCAGAGGAAAACTGTAACTGGGTTGTTGGTTTTTTTTCCTTTTCTTCTCTAGTTCTGTTTGTTGTCAATATTATAGTTATTATTGTTAATTTACCTTGTTAGACTAACTAGTAAAGAACTGTTATTCCTACCCTCATATCGTTGCCTGAGACCTCCCCTTCAATTTTAGGATTATAACAAAATCCAAGGGAAGTTTCCATTTTTTTTTTGGTTCCCTAGCAGACACCCCTGTCTTTCCAAACCAAGACA
>TguERVL2a2-LTR-cAme_b#LTR/ERV3
TGTCATGGGTTGCAGTGCAAAATGTAACCAAAACTGTGTATTCTATCACCATCTGATGAAACTGGGGTGTGGGGGGTGGTGTAATTGTCTGTCAATGGCCAACTGTCAATAAACCTGCTGGGGCAGTTTTCTTATCTCTTCCACAACCCAGCCTCCCTCCAGGGAGAGATCTTCTGCTAATGGGCCATTGAGTCTCACTGATAGAATTACATCATCCCACTGGGAAATGCTCCAGCCAGGGGGAGGAGCCAAGTATTCCTACCTGGATAAAAATCTGGGAGTTGGAACACCAAGGCAGCCTTTTCCACTGGATTCTCAGAGGAAGACCAGGCCCATCTATCACCACTGGACCTTCAGCGAAAGAACTCCACTTTTCTACAGGAGCATCACTTCAACAGAGCCACATCTGCCACTGGGACTGCAGCCACCATTGAATGGGACTGCCACCAACACCCTGACCCACAGGGTGTCAGGTTGTATCCTGACTCTGTCAGTGGGTTTTGTTTGTTTGTTTGTTTTTTGTATACTGCATGTGTTTTTGTTTTATTGTTTATTTTAGTTCCCCTAATAAAGAACTGTTATTCCTATTCCCATATCTTTGCCTGAGAGCCCCTTAATTTCAAAGTTATAATAATTTGGAGGGAGGGGGTTTAAATTCTCCATTCCAAGGGAGGCTCCTGCCTTCCTTAGCAGACACCTGTCATTCAAACCACGACA
>TguLTR11g-cAme_a#LTR/ERV1
TGATGCCTTAAGTTTTAGCTTTTATATTTTTTAGATTCTGTGCTGTTTTGGTGGGTAGTTTTAGGTTTCATATTCAGTGCTACTGAGCTCTCTTCACAGAGCAGGCAGACAAAACAATTCCTTCTCTAGTTTGATACCAAGGACAACTTTCAGGCCCAAGAACAAAACCAAGGGTGAAGTGAGAAGGAAAACCAAGGAGGATGGAGCTTCATAACCTGGAGCTGGAATTGGACAATGAACTCCAATGTGCTGATGGAGCAGAACTTATCAAAGTGTGAGCCCTCGTGCTCAGGTGTCCATTCTGTGCCCATTTTGGGGTCACCTTGGGTGTGGCCCAGCCGGGCTCTTGTGCTGCCCAGGTGTGCCCAGTGAGGCCTTTTAATAAATCCCTGCTTTATCCTTTTGCTCTGGCTGGGCTCTGCTCCAGCTCAGCCTCCAGAAGGCATCA
>TguLTR11g-cAme_b#LTR/ERV1
TGATGCCTTCTGGAGGCTGAGCTGGAGCAGAGCCCAGCCAGAGCAGAAGGATAAAGCAGGGATTTATTCCAAGGCCTCACTGGGCACACCTGGGCAGCACCAGAGCCCGGCTGGGACACACCCAAGGGGAGCCCAAAATGGGCACAGAATGGACACCCGGCCACCAGGGCTCACACTTTGATAAGTTCTGCTCCAGCAGCACATTGGAGTTCATTGTGCAATTCCAGCTCCAGCTTAGGGAGCTCCATCCTCCTTGGTTTTCCTTCTCCCTTCACCCTTGGCTTTGTTCTTGGGCCTGAAAGTTGTCCTTGGTATCAAACTGGAGAAGGAATTGTTTTGTGTCCCTGCTCTGTGAAGAGAGCTCAGTAGCACTGAATATGAAACCTAAAACTACCCACCAAAACAGCACAGAGTCTGAAAAATATAAAAGCTAAAACTTAAGGCATCA
>TguLTR13c-cAme#LTR/ERV1
TGAGAGGAATGAGGGATTTGTCTTTCCAAACAAGCTGTGGGTCTGCTGGTAGATAAAACTAGCACTGAGAGATAAAGGAAACAATGGGAAGGATTCCACTGATTGATGAATGGAAAAAAGGTATTTGCCTTACAAACAAACTGTAGGTTTGCTGATAAATGAAATTGGATATTGAAAGATGAAAGAAACAATGGGGAGAAACCATAAATTCCATAAGAATTAAAAATTAAAAGGGAGGGTTATACATTAGAGGGGAATCTGAGGGATCAGGTGTTCGGGAAGTCTGTACCTCTCAAGTACCTCAGCCAGTGGGGAAAGAGAGAGGGAAATGGAGTTGGGAAATTGGGATAAAAAGGAGGCTGCATCCTCCAAAAATTTGAGAGACCCCAGGGGAATGCCCCATGGCCTCTCCCTTTATTCGAATAAAGTAAAAGGACTCCTCTGTCTCCTTTTTGGACATAAACCTCTGGTGTTTGTGGATTAATTTTCCTGAC
>TguLTRK3a-cAme#LTR/ERV2
TGTCGGAGCCCAGGACACTCCTCTGACTGTCCTGGATGATTTCAGACCCGGGCAGGGGGCTGAGAGACCTTGGCATGGAGTCAAAAACTCCTGTGCCTTCGATTTTAGCCCTTGGGAGAAATTACCATCTCTGTGTGAGGATTTACAGGCCACAAGAGTTTGAGTAGAGTGATAGTTAATTTGTCACAGGGTGAAAAGTAGAATTTTGGGGTTTTTAGAATGGGGGTTCAGGGGGCAAGATGGAGGAATCTGGGTGTGTCCTGTCCTTCTTCTTGTTCTTCTTGTCCTCCATCTTCTGCTGTGATGGTGGCACTTTCTGGTTGGTTTAGAGTAGAGACAGACTGTCCAACATAGGTGATAGGTATTGGAAAATTATTGTAAATAATGTACACGTAGTTTTTAGTATAAAAGTAAACACCACCCTGAGGGTGGTGGATTGTGCCTTGGACTGACTTGCTGAGAGGATCTCTGCGAGTCAGGGAAAGAATGTAATAGATAAGGAAAAATAAACAACCTTGGAAAACAGAAGAGACGACTCTCGACTTTTTCTTCGATCACGGGGCTGGGAGAAAAGGACTTTCTAAATCTCGGGAATCATCAAAACCATCAAAAAACCCGAGA
>TguLTRK4c-cAme#LTR/ERV2
TGAGGCAAACCCCTTGGCTTTATCTGGTTCTTCTTCTCAGGGTCAGGATTAAAAGCACGAGAGACAGAATTCTTGTTGGGACTTGGATGTTTATTATTTCTTATCTAAGTTACAGCCTCACTGACTGTGAGTGCTTCTACATGCTGAGTTAACAGAGCAAAAATGGAGCACAGAGTTCTGTCTTCAAGGTCTTTTTAAGCCTAAACTACCCAATTATGAGATGCCAACTAATTTATTTTAACTTTTAACCCAATAACTAATCACCCATGTCCTGCACTGTGGATTTTTCCAACCAATCACACAAAATCACCCAAACTTGTGAAGAAGAAGGAGAAGGAGAAGAAGAAGAGAAGGAGAAGAAGAAGAGAAGGAGAAGAAGAAGGAGAAGAAGAAGAAGAAGGAGAAGGAGAAAGAAAACTATGCCCTAAACCCTCCATCTTGTTCCATATATATTACTATATCCCAAAACCCCAAACTCTAAATCTTTCACCCTGTGAGATAACACACTTCTATTCAACTCCACCCTCACAATCTCAGTGCTGTCACTCAGTTTTGGAAGCCTTTTCCATGGCCTCAGGTCAAATGCAGTGTATCTTTGAGGATCAGTCCCTGTCAGCACAGAAAGCCTGAAATCCTCTGTGTCCAGGGTTCCAACA
>TguLTRL1b-cAme#LTR/ERV3
TGTCCTGGTTTAGGGCAAGTTTGGGGAGAAACTCCCAAAGGGGCCCCTTCAGAGAGCAAACCCCCACGGCCCCTCCCCCCCCCCAACCGGTTCGGGAAGGATTCCTCGGAGAGAAGTGGAAAGAAACCTGTTTATTTAACAGACAGAGCACCCCCCAACACACAAGATGAACAATATGGATCACCGTTCTGACGAGATAACAAATTCAGAAAGTCTCTCTCTGGGGAGTGGTCGCTCTGTTGTTGATCTCTCCGGCGCTGGGCAGACTGCTGCAGGCCACAGAGTGCAGACTCTCGGTGTTTCCCAGGTCCCAGTCCGGAGCAGGCTTGAATGATTCCACGAAAGGAGAGAGGGAAAGAAAAACAGTCCGGAGGAATCTTGGACTGTCTAGCTAAACTAACTAAAGAGCTAAGCAGAAGCAAGAGCAAGCAAGCAAAGCAGAAGCAGAAGCAAAAGCAGCAGCAAAAGCAGCACTATGTGTCTGTGTCCCTCCGACTATTATCAGCAAGCTGATAACAAAACCAAAACAAAACTTCCCCGAGCCAGTCTTGAAGAACATCTCCAGCCCAAACAGAACAGACGATTGGGGATACAAACCTCACAACGTCACCCCAGGACA
>TguLTRL3b2-cAme#LTR/ERV3
TGTGAAAAACACGGTTCACTTTCCTGGTAAAATTTAAAGAGTTTAATAAAAGACAATAAGAGACAAACAATAAAGCAAAGGTTTAACGGCCGGGTGCCTTGGCACTTTGCCAAGAGCACACCTGCTGTGTCTGAGACACCCCCTTAAATACACCAGCCTGTTACATATTCACAGATCTATATGCATATTCAAACTTTTCAAAGAACTTATTTCCATGTTTCTAGGAACTGTTTTACATGGCCACTCCTTGGGTCCGCCTTTTTAGAGCATGCGTTCTTCAGTTTTAATTCCTTTTTATCATCTTTTGATTTGGGCTTTGGTCTCTTTTTTCACAGGCGGAGAAAGCTGATAGTAGCTTGGGCCCCTCTTGGAAGTTATCTTTCTATTCAGGCACACCACACCTAAATTCTAAAACTACAGCAAAAAGCCATTATACATATAACATTCATCTTAATACTTGCGAAAAGCCAATACTAAAATATGCATTTATAACA
>TguLTRL3c-cAme#LTR/ERV3
TGTGAAAAACGAGGTTCACTTTCCTGGTAAAATTTAAAAGTTTAATAAAAGACAATAAGAGAAAGACAATAAAGCAAAGATTTTATGGCCGGGTGCTTGGCACTTAGCCAAGAGCACACCTGCTGTGCTCCAGACACTCCTTAAATACACCAGCCTGTTGCATATTCATAGACCTTTATGCATATTCAATTTTTCAAAAAACTAATTTACATTTTCTAGGAACTGTTTAGCATGGCCCCTCCTTGGGTCCGCCTTTTTGAGCATGTTTTTCGGTTGTATTTTTCTTATCACTTCCAGTTTGGGCCTTTGACCACAGTTTTTCCAGAAGGTGGTTGCTAGTAGTTCGGGTCTCAGTCGGATCTTCTTCATTCATTCAGTGAAGATTTCCTGATTAACGAGATAGTTACAAAACTATTACATCACACTACTATGTCTATTGTTAAAGCAAAAAAAAAACTATATTAATATAGCAAAATTTTTCTACATTATACATATAGCATTCATCTTAATATTTGCAAAAAGCCAATATTATAATATGTATTTATAACA
>cAme-LTR_01#LTR/ERV
TGTTGGAGTCTGGAATTATGAGAAATATTTCTTTGCATGTTTAAGAGATTTTAAGATCTCTGACAAACAGTGTTTTTAACCTTTGTTCATGGAAAAAGGGCTTTTAGGCTCTGGAATGAAGCAGAGTTTTCAAGAGTGTGTATTAGATAGTAGAATAGTGTGTAGTTTTATCACAGGGTGAGAATTTTAGATATATGGGGTTTTTAGGATGGTAAGCAGGTGAAGACAAGATGGAGAAGTCCACGTGGCTTTTGGGCTTCCTCCTTCTTCCTCATCTGCTCCATGTTCTGCAGTGAGGTGGCACATTATGGTTGGTTTAGAGTAGAGTCTAACTTTCTAACATGGATAATAGTTATTGGAGAAGTATTATAAATACTGATTACGTGGATTGTAGTATAAATGTACACACCACCCTGTGTGGGGGGGATTCGGGGTTTTGTGCCTTGGACTGACCTGCAATGAAGAGCTCTGCTGGTCAGGAACAGAATGTATTGATAAGAAAGAATAAACAATGAATGAGAACATCAGAAGAGACGACTCACGGCCTTTCCTTCGATCTCGGGGCTGGGGAAAAAAGACTCTGTTTGCATTCTCGGGTCACGGAAAACAGCCGGCAGAGAAAAACACACAAAAATATTTTTTATAAACCCGAGA
>cAme-LTR_02#LTR/ERV
TGTCTTGGTTTGGAAAGACAGGGGTGTCTGCTAGGGAACCAAAAAAAAGAATGGAAACTTCCCTTGGACTTGTTATTATCCTAAAATTAAAGGGGGGTCTCAGGCAACGGTGTGAGGGTAGGAATAACAGTTCTTTACTAGTTAGTCTAACAAGGTAAATTAACAATAATAACTATAATATTGACAACAAACAGAACTAGAGAAGAAAAGGAAAAAAAAACAACAACCCAGTTACAGTTTTCCTCTGGCACCCCCCACCCCCCTCAGTACCGTTACAAGCTACCAGAGCCAGCAGCAGTCCTGGGAGGATGAGATGTATCCGAGGGTTGGCAGTGGCTGGAGCTGTTGGAAAGTGTCCTGGCTGGGCAGGGGCTGCAGAAAATACAGCGTGGGGAGACCTCGAACAAAACTGAAGAAGCCGTGGGTGCAGGGCAGGGAGAAGGAGCTCCTGGCAGGGCAGGGAGGGAACGGGTTCCCAAAATCCCGGGGGACACACGAAGAGACGGTGGTCCGACCGAGTTCCAGGTGAAGGATGGTGAGAGCTCTCCGCCGCGCCGAGACGAGCAGCTCCGGCCGTTCTCCCGAGAGCAGAAAACTGCCCAGAGCGAAGTGAAGACGGTGCCTCCCTGTCTCTGCCTTAGCTGCTTCTTTTGTTTGGTCCTAAGCACCCATGAGTACCGAAAAGCACCCAGCCATTAGCTTCTTAGCAACTTCTGGGAAAAAATTCTATAAGAAAATAACCCAACCCCCAACA
>cAme-LTR_03#LTR/ERV
TGCCTAATGCTCCCACCCTCAGGGTGGCGTGGATATTTATACTACAATCCACGTAATCAGTATTTATAATTCTACTCCAATAACTATTATCTATGTTAGAAGGTTAGACTCTATTCTAAGCCAACTATAATGTGCCACCTCACAGCAGAAGATGGAGGCAAGGAAGAAGAAGGAAGAAACCCAAAAGCCATGTGCTTCCTCCATCTTGTCTTCACCTGTCTGCCATCCTAAAAACCCCATATATCTAAAATTCTCACCCTGTGATAAAACTACACACTATTCTACTATCTAATACACACTCTTGAAAACTCTGCTTCATTCCAGAGCCTAAAAGCCCTTTTTCCATGAACAAAGGTTAAAAACACTGTTTGTCAGAGATTCTAAAATCTCTCAAACATGCAAAGAGATATTCCTCATAATTCCAGACTCCGACA
>cAme-LTR_04#LTR/ERV
TGTTGCGACCGGGATAGCTGTTGATGTGGTGATGGTAAAGAGAAGCAGGAAGGGCCTTTGTATGGGTTCCACAGAGATGTTTATTCCAGCCACGCACGCAGACAGTCCAGGGTCAAAGGCAGGGCTCATGGGAAGGGTTCAGGTTCAAGTATATGGGTGCTGGGGGCTGGGAGAGCATCAGGGACCAATTGTCAGGGGGCATCGGGCTACAAAGGTGGGATTGGGGTATGTGAGCCAATGGGGAAATTGGGAAGGAGTGATTGAGGGACACAGGGATGGAGAGGGGATTAACAGGGCTGACTGAGGGAGCAGAACAGGGGTACATTGGCATAACAGAACAGGGTATCCTGTGAGAGAAGCCTCTTATGTCTCCTTAACATAGGCAAAGCCTCTCCACA
>cAme-LTR_05#LTR/ERV
TGAAGCGTCCGATTCTAGCCCGGATGAGATAACCGGCGCTTCGTCTCAGGTCACCCACCCTTGGCGTCTTTGTGAGAGAGACACTCTGATTCGGTCGTCCAGAAACAGAACTTTTTAATAACGGGAAAATAACAAACTATAAGCCGTGCACCGTACAAGGGAACGGACCGAAAAAGAGCGGGAAGGTCCAGGGTAACAGCATTCTTAAGCACGAACACGGGGGAGGGGTTTAGGGTGGAGAAAGTAGGGATAGTCCAATGGGGGAAGGCGATTAGGAATATGGAAAATATTGCAGCAAAATACAACCAATAACAACAACGAGAACTGAGAACTTTCTGGAAATGATTTCCATAAACCAAATGAGGTAATTGGGGGTGGGTACCAGCTCACCCTGATTGAGAGCTGACCCATGGTTTGGAGTTAAGATTTCCACCCCTATCTGCAGGGCAGACCACTACA
>cAme-LTR_06#LTR/ERV
TGATGATTCCCCTTTCCCTCCACCCCCCCACAAGCTGCTAGCTCAGATTTAGGGAGTTTTGGGAGAGGGGATCTACAAGATAGGGAGAAGAGATTCAAAAGAGGCCCCTTACCTCAGGATGTATTCCAAAGCTTTATTCTCAATGAAGGGATCCCAGGAAGCAAGGAGGGAGCACATGGAGGGAGAGGGGTTTTTATCTCCTTTGGGGTCGGGGTCAGATTACCTGGCCGAAGGCCATAGGTCAAGAGACAAGGGGCAGGTAAATCAGGCCAGGTTACAGTTTCTGGGGGAGGGGTTTTGGGGAGAGAGCATTCCCAAAAGGGATGCAACA
>cAme-LTR_07#LTR/ERV
TGATGCCGTTTAGGTTTTGCCTTTTTTTTTTTTCTATGTTCTCTGTATTCTTCACACATATATTTGTAGCTCTGTAGTCTATTGTATTAGTGACTAGTTTTCCCAGTACTTTTCCATGGCCTTTCCTTAGGCAGAAAGACAAAACAAATTCCAGAGCTCCAAGCCCCGGGAGGTACAAGGCCCCAATGCTATCTTGGTTCTTCCTGGGAACCAAGGCTGAGAACAACTCTTTGAGATACATTCTCATGGACAAAGTACAACTAGTGCTGAAGGGGGGCTCCAGAGAAGGGGCTTGACCTGGGGGGGAATTGCATCACCACTTGTCCTCCTAATTGGTGCCTTTTATCAATTATGCTAATTTCCTAAAACCTATAAAATGTACTCACCCCTGGGGGGGGTGGGCTTTTGTGGACATCTTTCCATAACTGCTCCTGGAGGCCTCCAAATAAAGATCCCCTTTTATATTACCTCCTTACTAAAATTATCTCGAGTTTCATTTCCAGGTTGGGAAAAAGGCAACA
>cAme-LTR_08#LTR/ERV
TGTCGCTGTTATTTATGAACAGAAACACACAGACTCCAAATAAGTTCATCAGAAGGCTGAAAAGAGGAATCTTTATTAACAAAATGGAGCACCTTATATAAGGTACTTCGCTAAGTAAAAAGTGATTGGTGAATGGGAACACCACCTTCCCTATTACCATTGGCTAAGTAAGAGAAACAATATATTCTATGTTATGGAAAACAAGGATGAAAAACACCACCTGTTGTTTTGAGAAAGAATATTGTTTGGAGAGTATGTTTACAAAATTTCTCTTGGGAAAGTGAGAAGCTTTCCCTAGGAAAGAAAGGATCCTGACAGGCCTTCAGCTATGAAGTTTCAGAGACACAGAATTGTCAGCCCCACA
>cAme-LTR_09#LTR/ERV
TGTTATAAATTTCTCACCACAATTGGGTTGGTCAATCAATAAGGCAATTTATTAATTCGTTGATAAGGAACAAGCAAGCCAGCTTGGGGACGCGGGGAGTCTCTGCTCCACCAACACGTCCACTCTACCCTCAGTCACTGCCCCTTTTATAGGCAGTTTCTCGTTGGGCTGTGTCATGCTTACTGTGCTGGGGTACAAGTCTGAACAAGCCCGAACATGTTGGCTAGCTTGTAGTCTCATAAGCCAGGAGCAGCAGTCACAAGCCCCATCAGGTCTGGGCAAAACCCGAGCACGTCGCTAGGCTACACTCCCAGCCAGTAGGCAGCAGCAGTAACAAGTCTCTACATGTTCACACAAGCCCTCAGCAGTAAAAAGCCTTTACATGTTTTCACAATTTTGCAGTTTTCCTTATACATAAAAGTGGGTACAATTATTTGGCAAGAAATACATAATAGCAAAAGTCAGTACACCAAAGGGATTCAAAACAAAATAATGAAATTATTATATGTTCCTTTGCCTTATGTCCATGTTTTACTTTAAGCTCAGTATTCTTATTTATATAAATCTCATAATTTGTTTCTATAATGACACGAATCACCATATAACATCTCACA
>cAme-LTR_10#LTR/ERV
TGTCGCTGTGCATTATCACACAACGACACGGACTCCAGATCAGAAGGCAATGGCAAAAAGCAACTTTATTAAAAATGGCGCACACTTTTATAGTGTGCTCCGTGGGTTAAACACGGATTGGTTAACCCGAGAAAACAATAGTCTTATTGGAGAAGAAGGGACCAACACCCCTTGAAAAACAATCCTGCAAAACAGCACTTGTTTTTCCTGTGTGGCATTCGCCAAACACCAGGTGTTGAGCTTTGCTTACATTCTTTCTTCAGCTTTTCCCAGGCTAGTCCTGAGAAAAGCTGAGAACTGCTTTTCCCTGTTCACAGCAAGTGTCCACAG
>cAme-LTR_11#LTR/ERV
TGTGGTAGTGCAGATGCTTCTCTCCATTGTGTCTCCAGGTATCCCTGCCCCCAAGTGACGTGTTTTTCCCCTCCCCTCCCTGTCCCTGGAATGTTTATCCCATTGGCTGATGCTGTATGCCTCCCCTCCCCTATCCCGAGGTTTGAAAAACTCCGGGAAAGCCTCTCTGGGTCTCTTTTCCCTCCTGGACATTGCCAAGAATAAACTCCAGCTTCCATCCCGGAGGAAAAGCAGCCCTTGGTCTTACTTCAGTTCCGAAGGGAACCTCCTGCCTTCCCCACAGCACAGCTAGCTAGGGGAACTCGGGAAGGACAAGGAAAGGGGTCTCCTTCA
>cAme-LTR_12#LTR/ERV
TGTAGGAAACAGTTATGTGCCAGAACGGTCTGGGACAGTACTCAGCCGAGATCTCTATGGTTAAGTTTTGAAGTTTATTCCATAGGGTGTGGGTGAAAAGAGCCCAGCTCAGGGTTAGCTCAGAGCAGGCTAGAGAACACAGGAGCAGGAGAGAGCACAAGGCAAGAGAGCATAAGAGGATAAGAGCAAGAGAGAGTAAGAGCAGGAGAGTAAGAGGGTAAGAGCAAGAGAGAAAAGAGAGCGAGCTCTCCTTTTACAATGACTTATATCTCTTTCTATGTTGAATATTCTACTTTCTCATCAACCAATCTAGTATTGAATACAAATTTTCTACATTTACATACATCCTATAGGAATCACTACATTACCATGTTTTACTACTTTCTAATCTCTAAATCTTATCAGGGGTCCCTTCCTGGCAAGCCAGGGAAGAAGGGTCTGTTCTGGTTTGGTATGTCTGTTAGTAAATCACATTCTTAACAAAGAGAGAAAGACCTTTGGTCAGCCAAAGCTGTTCTATAAACATTCAGACAAACACTGCTTTCATTTCAATGTCTCTTCTAGTTTCTGCATTCTTAGCATCTTTGGATAAGTAGTCAGATTTATAGGACTTTCCTGTTTCTTCCTTCCCAACA
>cAme-LTR_13#LTR/ERV
TGTCGCTGTAGAGGCGGTCATGACACAATAACTACCAAAAGTTTCCAAGGCAGAAAAAAGCTTTTATTTCAACCGCGTTTTCCCTTTTATACATTCCTTTCACCAAAGGCGTGCACTTCACTCATTGGTTAGTAAAAGGTATTTTGCTTGTCCATCAAATCTCTCTATTCTTGGTTAGTTTACATATTTTGTTCCCTGATTCCCATGAGACAGATTTCTTATTTACTGCAGGTGCAGTTGTTTTTCACCCAGGAATAGTTTGTTGTGTTAACGAACTCTCATTCCCAAGACTGTTTTCACATGAGAACTTGCAAGCTACTTTAGCTGCACATAGAAGTGACAAGCTAGCTATTAATTTAGCAGAGCAAGGCCTGATTTTATGAGGCCTTTCTTTTATAATTTATCTACCTTTCTACCACA
>cAme-LTR_14#LTR/ERV
TGTGAAATACGAAGTTATAGTTCGTGTCGGGTAAATAAAAATAATTGGTGTAATTGTGATTGTGAAATATGTGGAATACAGTCATGGGACAGTTATAAAGATGAGTTATAATAAACATGGAAAGCAAAGCATGGAAGAAGGCCTTTTGAACTAATCTTTTGTTCACAATTAACTACTATAGATCTTAAGTTGTTTTGTAGTAAGAATATGTGAATTATAACTTTAGATGTTGCTTTTTCTTTTGACAAATACTTTCTACTTGTAATTAAGCCTTAAGCTGTTTTGTAATAAGAACTTTTGAATTATAGTTTTAGAATATTGCTTTGTATTAAGGATTTTTAAAACTGTAGCTTTAGAATGTATAAAAGGTTTAAACAAAAGAAGGAAGTGAGCCTATCTCAAATTCCTAACAAAACGGTGAAGAAAACAGCCTGAGAAAGGAAGATGGACATCAACTCGCTGACTAATGGTTTCGAAAAGGGAAGCTGGACCCCACCATCTGGAATATACATCCCAGGATGTACATTCTGAGAGGAATGGATCACAATGGAGTATAGAAATTGTAAAGAAACCAGCTATCACTATCATTGATTTACATCCTGAAGTATCATCCTGAGAGGAATGGATCACAATGAGTATAGAATTGTGACGCAAAAACTGGAATTAGAAACTGCTGAGAAAGCCTACAGATATACATATAAATACCAGCAGGCCTCAGCATTCGGTGTGCAGTTAGAGGGAGAGATCCCACTTCTGCACCCAGCGCTGCTTTGCTTATATTTTACCATATTAATTAATAAATTGAATTACTGCTTGATATATTGGCTGAGTCAAGCTCCTCATTTTTAACA
>cAme-LTR_15#LTR/ERV
TGTGGAAGAATGGTTAGAGAATAAGGGACATGTGAATCTACATCAGTTTGCAAGTGTAGAGTTAGCAAAGTTTAAGACTCAGCTAAGCTGACAAGGTCACCGTGCCCTTGTAGGAGAGCGTTATAACAACAACGAAGTTTTGTAGCTGATAAAGGGGGAAAGGAATGTTAACACTGATCCACAAGTGTAAGAAACTAAGAGGAGTTAACGTTTCTGTGAGTAGCGAATGATTAGCTTGCTTTTGCACTACGTATGAGCTTCATTATGAATTGTATAAAAGACATAACTAACGGAATAAAGTTGAGACTTACTGATCTCTCATATTGAGAGCGGTCTGTCTCCCGCTGACCCCAACA
>cAme-LTR_16#LTR/ERV
TGCAGGTGAAAGGAACTTCTGAACACCGAACCAATATGATTACGCAGAAGCCGTTTATTGTTTACATTACAACCCCAATTATACATTTCTAAGACTACTGTTTACACTTTCACACATTGCTCAATTGGTTGATCGGTCCCTTTCACTCAAGCCCCACGAGGGTCTCTGGAAAAGTGATTGGTCAAAGTCCAGGTGTTCCTTTATCTAGTGCTTTCATTCTTTGCCACCAGTTTCTCAGCATCTCTGCTCTCGATTTAGCCTGACTGTTGTTTCAGCGGCCTTGAAGATTTCTCAGTTTAGCACTATTGTTGTTTCAGCAACCTTGACGAATTCCAGAGGATCTGATAAACACACCTAGAGATAATTTGGCTGGGGCATCCCTGGGAACAAGTTATTCAGATGCATTGCAACA
>cAme-LTR_17#LTR/ERV
TGTTAGTATAGGGTTAAATGTTTTAAAAATCATGTATAACTAAGTAGAAAGAATGAATGGTATTTGGGATAGTTTAGCAGGCTAAGATATCTGTAGTAATGGGAATCAGTGTTTAGAGTTTCTAAGATACCCATAGATAAGACCCGTACATGTTGGTACAAGCTTGGGCTGGGTACTAATGAAGTAATATCGATAAGGTTGTTATAGTGATTATTGCTTAGGCGAGTGTCTATTTTTAGTTACAACTGAAAAGGTATAAATACTTGCATTTTGAACAAAGATGACGGAGCTAGATTTGGGTTGCTATACCCCTAGTTCCCGCTCACCTCAATAAAGCACCTGCATATAATCCATTTGTGATTATGTGTGTTTCTGGATGCTAACA
>cAme-LTR_18#LTR/ERV
TGAGTCAAAGGGTTAAAAGATTTAGGAATTAGAAATGTAGCCAGCAAAGATGTAAGCAACACATCAGATAGCAGGGCCTAGCGTAATAATAAGGGGATCAAAGAAGAAACTAAGGGTTTAATCATTAATATATAGGTATAGAGCAAGACAATCTATCATGTATCTGACACTTAGCATTGTAAGAAATCAGAAAACCAAGACTTTTGATACTTGGAGCCAAGAAAAAGAACCTGGACCATAACCAAGGGGTCACAAAGACCTGGCAACAGGACAAATTTGTGATGAAGACAACTTTACTTCATCCCATGGACCACTGACTCAATTCAAAAGGACCACTGCCTCAATTAAAAAGAGGACTGTGCAGTTGCGAAGGACATCCAACTGATTTTAATACAAGGCGAAGATAGGTACTGCATATGTATAGACATGTTAGGTAATTTTATGAATATGTATGATTTTTAGAAATATATAGAAAACTGATGCTTTGTGAATTCAGCACATGTCTTTAGGACACAAGTCCTCTGTGCTCCAGTACTGAATAAACATACAAATCTTTCAACCTCAAATTAGTTGAAAGGTTTTTTGTCCGTCTGGCACACCTTTAGTGCTTCA
>cAme-LTR_19#LTR/ERV
TGTTATAAATGTACAGAGCCAATTTACAATTAATTAATAAATTTTATTGAGAATGGCAAGCAAGCAGCGCTGGGCGGCCATTAAGTCTGCGCTCTAACAAGGCTCGCAAATTGCATTCGCAGTTTGTCTTGGTTTTATACTGTTGCAGGTCTCGTTTCCCTTCAGTTCCCTCCCAGTTTTGTTTCTTCAGTTTTTCGTCTTCAAGATTGTACTGCGCAGACTCTCCGCTGTTGCTAGGGGGTCTTCTTCCCCCTTTCGGGGGTCGCTGGATGAAAGGGACTTATCTTCTTCAATGACCTTGCATTCCACTTTCCTTTAGCGCAAGCGTACATTACTAAAGCATCAAGCAAGCAAGAAAAAGCAGCTAATCCTATACAAATAATCACATCCTGTTTCATCCTGTCTCTATCTTTATTTAGTATCATTGCAGCTGGACTTATCTATTGTGACTTTAGCTACCTTGTAAATTTCGCCTCAACAGAGCTGACATTTATCAAACACGAATCACGTACACATATTTTACA
>cAme-LTR_20#LTR/ERV
TGTTGGGGCCTTTACAGGGGCCATAAGCCTTCAGCCAGTGTACAAGAGAATCCTGTAATGTGTCTTTAATAACAAATTGTGTGAAGCAGAAGGAACAGAAGCTAGACAAAGGAATGTTAAACATAGCAGCCCAAGTTAGGAGGTTACCAGCAGAGAATCACAAGAAAGATAACCAAGATCATTAAAAAGTTCTGCTGGCAGCACGGGAGGGATGAAGCTGAACACCTGGAGATTTGACCATGAACAGATATATTTTTAGCCTTTGGCACAAACTATGCTGATTGTATCCTGCACGTACTCAAAACATATATAAGGTTTTTCACTTGCTTAATAAATCGGAATCAGTTCCACATCATATTGGTGTGTCGTCTGTTCCCTTCTCCGACACGGACCTCAACA
>cAme-LTR_21#LTR/ERV
TGATGCAGCTGGAAAGCTGGGTGAGAAGTGTACCCAGGGGCTGTATCCTTCCCAGAGAGATGCGTCTCCAAGGAGAACACCTTCTAGGGGTACTGCCGCTTCCTTGGCTGTGAGGGGATTCCAGCAAGTGATTTCAGCTCAATAGTGATTTTCAGCTCAAAGCTGGAATCCCCAGGCTGACGCAGGAATGAGAGAGAGAGGAGTCTGTATGGCAATTCCACAGAGATGGCTTTATTGTCAGCATCTCTGCAAAGGGAGCCAGGAACAGAGAGCTCCTAAAAACAGAGGCTGAGGCTGGGGTTTTTATAGGGACAGACAAGGGGTGGATACAGACCATTTGCATGAAAGAAGCAAGGTATGCTGGGTGTAGTTTACTGGGGTCGCCGTGAGCTTGAAGTGAGTTGCTTATCTTAGGGATGACTCAGGGCATCAGCCTGATTCCTCCATGGGAGGGCAAGAGGCCCTCCTACAGAGGACTTATCGTCCTCCACA
>cAme-LTR_22#LTR/ERV
TGTTGCCTCTGCCGAGGCTGGCGACCTGGTTCAAGAAAGACACGACGACCCACTTACATGGTCGTTCGGGCAAATCACTCACAGACACCAATATGGTGGATGGTGAAATGGCGTTTATTGCTTTCTTGCATGGTCTTATAAAACTACGGTCTGCTTACATCATTATTAATTTCGTATTGGTTAAATGCACTGGAGGGGTGGGGCCCTGTCTTCCCGTACATCGCGGTATCTTCCGACCGGACTCCCTTGTCTAACAACA
>cAme-LTR_23#LTR/ERV
TGTAGCAGTCCAATTAGCTGGGATAAATAAAAAAGCCAGGCCCAAATTCTCTGCACCAAGGAGTGGGCCTAGGACCCTGGGGAGCAGGGGGCTGAAACCTTAGACTTATAAGGTCAAGCCCCTGCCCCATAGCTACAATTGGATATCTGCCCAGGTAAACCCTATATCTAGCCAAGTTAGCCACGCCCCCAGGTCTTTGGATGCAGGCCCTTGGACCATGTGCTCTCTGGAAGCAGCTCCAGGCCATGCGGCCTGTGAGTGCTGCCTAGAGAGCACATGGTCACTGAAATGGATTAAAGAACATCTCTGAGCCTCATCCATCGTACCCGTCCCGTTTTTTAAGCCACGCTCCCCAGCCAAACTGGGTTTGATGTAACAGGAGGTAACCCCACGCGGACGGATACACTGTTACA
>cAme-LTR_24#LTR/ERV
TGTCGCAGTCCCGCCACGAGCCTGGATAGCAGTGGGGTAAGAGGAAGCGGTGCTGCAACCCCCCAAAAGCATCTCCCTAAAGAAGCTGCTGGGTGGCACTGGCACACACTCACAACTCACACTCACAGCACTCACGCTTGGCAGCTGGCGACGTGCCTGGCAGCAAAGGAGTGGGAAGGGTCTCTGCTTGGAGTTCCAAGGTGGTTTATTAAATCCAGCACTTGAAGGAGTCCAGGGGCAAAGACAGAAACTAATGGAGGGTCCAGGGGTTAAATAGGGGGACTGGGGAGGGAGGAACAGCAAATGGGGAAACGGGGGACGGGGCACTGCGGCAAAATGGGGCCAATGGGAAAGCGGGGAAGGGAGAACATTCTAGGGAAAATACATATAAGGAATAAAGGGGTGGGGAGGCCAACGGCCAACTGGGGAGGCAGAACTGGGGTACATTGGCATGTACATTTCTGAGCCCTGTTCCCTTGGGCCAACTGGCCTCCACA
>cAme-LTR_25#LTR/ERV
TGTTGAGAAAGAGTTAAGAGTTACTGTTTGTTATGTTATTGTTGCATAATTAATGTTTTTGTTGTGTTAATAGTTTAGTATGACTATTAAATAATGTTAACAATCACTTATTTTGTACCCCCCCACACACTGTATCTTTACCCTAAGTTGCTGTATCCTGTTTCGTGTTCCTGTATCCCCTCTCCCAAGTTACCTGTATCCTGTTCCTGTTTCCTGTTCCCATCGGGTGCCACCTCCACTGCTCCTCTACACATGAGATCTAAATAGCTCCACCCAGTATGCAAACCATGTGGACTCCCATGAATCTAGGCGACTACCGGAAGTGAGACCACCGTATGCAGACCCCTGAAGCCTGAAAGCCGATGCACAAATATTGTACAAAACCACACTGGAAGACTGGGCAGAACAACAGATTATTGTGGAGCTATTTTGTCATCTCGCTATAACCACAACAGAACCTGCTCAGAGACACCCCCTAGACCTCGACAAGCCAAAAATGGGAAATCTCCTATAGGACTCCTGTGAGGTTGGAGCCCCCAGCTCTGCCTTCGGGCAAAGCTGCTTGCACCTCCTCCTCTTCGTTGTCTGCAGGGAGCAGTGGCGGTGAGCGCGACCCCTCGAGCCCCCACCCAGGCTGATCTAATAAAGGCTTAAAAAGGGAGCAGAAGGTCTCCTGGCCCTTTTATTCTTCTCA
>cAme-LTR_incomplete_01#LTR/ERV
TGTGATAAACAAAATTCCCTGTTTGTTCTTATTCAGTAAGAGTTAGTTGTTAATGTTGTGGTTATTTGTTACCAATCATTGTTAAATGTTGTTTTCCCAGTTGTTCCCTTTTTACCCTAGTCTGTGTTTGCCAGTTTCATGTTTGTATCCCCATGTTCCCAGAATCCTCCCGTCGGAAGCTACATTTGTTGCACCCCGACTGCTGCTCCCAGACGTCCTTGCGCACTGACTGTATGCAAATAAGGGGCATTTGGCCTAAATCGGACTCCCAAAACCACAAAACAACGTATCATAGAACAATAAAAACAGCAGCACTACTCTGAGAAAACCTCAAGGAAGCATACACCAAGAGCTGAGTTCGGCCGTGTTGCCCTAAGTGCAATAGTACCCAGGCAGAGAGACACCCTAGACCGACGAGCCCTCATTGTCTTCTGGTGCTCTCGTGAGGATAGAAGCCCCAGCTCTGCCTGCATTCCTGTGGACAAAGCTGCTTTCCTCCTCCTGTGTGCCACCTCTGGGAGCAGCGGCGGTGTGTGCGCGACCCGTCGGGCCCCCACCTCGAGCTGATCACTAATAAAGGCATTAAAAAGGAGAAAAAGCTCCTGCCCTTTTTCTTCAGTTGGGG
>cAme-LTR_incomplete_02#LTR/ERV
TCCCTTTAAATGACCAAAAGTTGTCCCACCAATCACTATCTATTAAAGGAGTCCATTTTTGGGTACTAACATATGCCAATTTTCGAATCTCTTTGGATATATTTTTGACCACTGAACTTTTATCATCGATTTCCAAGCAACACTCGGAAGAGTTGAATTTCCCACATATTCCTCCTTCATCTGCAAGTAGATAATCTACTGCCAATCTGATTTGATAGATTACTGCTCTGGTTTGGGTTAATTGATCAAGTGCTAGGGCTGTTCTGTTGGAAACCATTTCAAGTACTGCTTGGAGCCTGATGATTCGGTTCAGCATATAAATTGGTGTACGGTATCCCCAGGAACCATCTTGGGCCCAGGTGGCTGGCCCATAAGTTTTAACAATCTCCTCTGGGGTCCATACTTTACTTTTCCACTTCTGGGTACCTCCTATGTTCATGGTATCCCTCTTTTTTCTGTTGGTTTTCTTTAAGTCATCATAAACTGGGACTCCTAGATGTGCTCCTGATTCCTTTGATAATAGAAAGAAGGCGGGTTTAATAATTCCCACAGTGCAACTTCCTGCCCAGTCTCCGGGGAGTCTGGTGTACGCTGTACTCCCGCAAATCCAGAATAGGTGCTCAGGAGCTTCCCAAAATTTATCCATTGTCTCTGAGGGACTTTCCCAGTATCTAGATAGTCTCCTTATTCCCCAGAAGGGGTTTATCCCTTTATCAGCACACTCATGTAATTTGTACCCTTCATGGTAGATACATCCTTTCTCTTTCTTTCCCACAGACCAGTACCGATTTGGCTCTCAGGGGACCCATCTAGTACTTAAATCCTTTGTTATTAGGTACCTTTTACAAGCCATCTTCCCTACTGGGGTTTTATATTTCTTTCCTGTTCTCATGATACACTCTTCTCCAATTATTTTCGACCTCAGGTCCCATTGCTCTTTCCCTCTCTCTCTTACGATTTGCGGTTCTTGTCTAGTTTGTTTCCATCTTATGATTTCCAATGGGCTTAAGCTGATCCCTTCCCATGGCCAGATTTCTGTCATTTGCGTGCTCCCGCAGACCCAGCAATCAGTTAAGTTTAGTTCTTTACTTATTCTTTCTACTAGGTCTATAAACAAGTTCTTTCCCACAGGGATATCTAGATCATTTCCCACTTGTTTTATTAGGGGTTTCTCTTTCACCAGGTCTGCCACCTTACTTTGGCTAGCTGTATGCTCAAAACAGAGCCAGGTATCTCTTACAGGGCATTCCCCAAATAGGCGCTGCTTAAAAGAGGCAGTGTTTCTTACAAGCCAATAAACTCTCCCGTCCTCCTGACAGGTGTGTAATTGGGAGTGGTTATAACAATTAGGATTCAGGTTTGTATGAACTCTCAAGAGAGACTCAAGGTTTTCTTCATCATAGAGAGGGTGGTAACATTTGGTGCAGGCGTCTTCTTCACTCCCTAGAGTGTCGTTTATCAGTAGGATCAGCATGATCCCTCCCAAGAGTCCAGTATGAGCCATCTCGCTTGACCTCACCTGGTCTTGCCTCTTGGGGAACAGGGAGACTTTCTGAACCTGCGTTGGAGTCTTCTCTTGGAATCAGTTCTTTTTCCACTCCTTTTTAATTTAATTACCTTTTAGGGAATGCTCTGTAAGAGATCTGCCCTTGTGTCAGAGTTGGGGTCTCCTTAGAGGGGAAATTGTGGTGAACAAAGAAACACTTATTGAATGGCAACACAACCTTAACCCTTCAACTTGTAAACCCTCTTTTAACACTTGCTAAACAGTATCACAACGTTAACATTTACAACAGTTCAGTCTATTAGGCTTGTCCAGAATACTACTCAATTCTTCGTATGGACTTTCTTAGTCGTCCTGCTTGGCTTTTCTTTTAAAAGTTATTTTAAGGTTCTCAGGGTGTGGGATAGTGGTCCACTCAGGAGCATCTACTGATGGTGTCACAGAATCACGTTCGCTGCTAGGAGGTGGTACTGGTCCTTTCACTCGGGAAATATGTGTCCAGCCCCGTTCTCGAGTCCTCACCGCAGTGTGTGTAGTAAGTAGTACTTGGAATGGGCCTTCAAACCTAGGAGTTAGTGGGATGTTGTTCCATGATTTTATCAGTACCCAATCCCCGGGACGAATTTGGTGCATGTCCACATCAAGGGGAGAGGTTTGAGGGAGGTATCCTTTCTTCCTAAGATCCCTTAGTGTCTTCCCGATTGTCTCTAAATACCTTTGGGTGGCTATTTCTCCTTCCAAATAATTCCCTGTGCTGAAAGGGGTAATAAGGAAAGGGAGTCCAAACATCATTTCATACGGAGAGACTCCTATGTCAGACCGAGGTCTTGTTCTAATTCGCAAAAGGGCGAGTGGTAGACATTTAAGCCAATTCATCTGGGTTTCAGAAATTAGTTTTGTTAATACATTTTTGAGGGTCTTGTTCATTCTCTCAACCCTCCCCGAACTCTGAGGGTGCCATGGAGTGTGCAACCTCCATTTCATCCCTAAAGCTTTAATCACGCCGTGTAGGGTTTGAGCGATAAAGTGTGGACCTCGGTCTGAATCAATATTATTTACCAGCCCGTATCGAGGAACGATTTCCTCCAAGATTATTTTTATAACCACTTCTGCAGTTTCTTTTTTAGTGGGGAAGGCTTCTACCCAATGGGTAAGATGGTCTACCATTACTAACAGGTGTTTATACCCTTGTACAGAAGGCATTTCAGTAAAATCTATTTGCATGTTTTGAAATGGTCTTAAAGTTAACTCCCTCCCCCCAGGTGTTGTTTTCCTCATTACTTTTTGGTCTACTTTTTGGCAGGTGACACATCCTTTTGTGACAGCTTTTGCCAATTCATATACTCCAATACATATATTTTCCCTTAGAAAGTGGTCACATAACCCTTGGATTCCCCAATGAGTTAACTCATGTATCTCTGCTAATATTCTTCGGGCTAGGGCTTTATTTAGGAACTTATGCCCATCAGATGTCAGCCATTCCCCTTGTTCTCCTTGGTGTAATCCTAATTCTTTTATTTTCCTTAACTCCTTTTCACTGAATGTCGGCTTCTCCCCCTCTTCCTTTTTATGTGATGATTCTTCCAGTCTAAAGATTTTTATTGGTTCCCCTGAGTCTAAAGCAGCTTCTTTAGCTATTCGGTCTGCCAGCTGATTTCCTTTTACTTCAATTGAGTCTCCTTTCTGATGTCCCTTGATGTGTACAACTGCTATTTCTGTGGGCTTGTGCAGTGATTCTAATACTAAGTTTATTAACTCCTTATGTACCAGGTTTTTCCCCTTTGAATTTAAGTATCCTCGTTCCTCCCAGATCTTACCGAAGGTATGGACTATTCCAAATGCATACTGTGAATCTGTGTAAATAGTTCCTTGATCTCTTTCTAGCAAGTCTAACCCTCTCTTTAGTGCATAGATCTCACAGCACTGAGCTGACCAGTTTGATGGTAACTTCCCTTTTTCTGCAACTGTCATGTGAGTTCCTTCTATGATGGCATACCCTGATACTCTTTTTCCCTCTATTACTCTTGAAGACCCATCAATAAAAAGAATTTTCCCGTAAGGTAAGGGGATATCCTCCAGGTCCTCTCTCACCTTGGTCTGTAGGTCTATTAGTTCAATGCAATTATGTTCTAAATCATCTAGGGGTTCCCCTGATAGAAACTGTGCTGGATTTAGACTTTTGGATGTGCTCAGTTCTAAGTTATCAGTGCTCATCAAGATAATTTCGTATTTCAATATCCTGGAATCGGTCAGCCACTGTTGAGCTCTGTGACTTAGGACTGTTTTTAAATCATGCGGTGTATGTATTCTGATTTTTCCTTGCAAAGTTAACTTTTGAGCTTCTTCTAGTAGGACAGCAGTAGCAGCGATTGCTTGCAAGCAAGTTGGCCACCCCCTAGCCACTGGGTCTAATAGTTTTGACAGATAGGCAACGGGCTTCTTGCTTCCTCCCCACTCCTGGGTTAGTACCCCATATGCTATTCCTTTCTCAGTGTTTACAAATAGATCAAAGGTCTTTTTGAGGTCGGGTAGGCTTAGGACTGGTGCTGAGGATAATTTATCTTTTAGATCTTGTAATCGTTCCTCATCCTCTGCTGTCCATTT
>cAme-LTR_incomplete_03#LTR/ERV
TGTTGTAATAAATCAGACAAGACTCCATTTTCTTCATGCAGGAAAAGCCAATTCTTTATTCACATAACTCATTTTTATACAGTTTTCACAGACCTCGTGTTGAACTCCAATTGGTTAATAGTTTTCTTGCCAATTACTCTATTGGTTTGTAAAAGGTATTTTACTTGTCCATCAAATCTCTCTATTCTTGGTTAGTTTACATATTTTATTCACTGATTCCCATGAGACAGATTTCTTGTTTATTGCAGGTGCAGTTGTTTTTCACCCAGGAATAGTCTGTTTTGTTAACAAACTCTCATTCCCAAGATTGTTTTCACATGGGAACTTGCAAACTACTTAACTGCACTTAGAAGAAGTGACAAGCCAGCTATTAATTTAGCAGAGCAAGGCCTGATTTTATGAGGCCTTTCTTTTATAATTCTTCTACCTGTCACGACAGAAA
>cAme-unknown_01#UNK/UNK
AGTGTCTTAGAATCCCATTGCTATCCAAGTTGATGTAGCAGAGCAGGTTGTAGAGCTGAATAGAAATTAGGTAAGAAATGAGAGGGAATGGCCTGTCCCTCATGCTTCTCTGTGTCCACAGAGCATGGAACCCAAAGCAGACTCTCGTCTGGCTCCCAATGCTCCTGGAGATGTGGCCAGAGAGGAGCCAAATGAGGCAAATGAGCACATCCCTGCAGCCGTGTTCACCCCACAGCCTGACCATTCCCAGACAGTAAGTGCATTTCCTTCCGAGGCAGTAAGTGAACATTGCGAGACAGTCCAGCACTTGTGGGTGCTGCTGCTGCCTTTAGTGCAAGGCACAGCTGCAAGTTCCTGAGCAGCCGTAACATTGACATAATTGAATTTTCCTGGCACTGGCCCAAGGTAGTTGGAGGTGCAAAGCTCACCTAAAGGCATCCCTCTCAGGAGAAGAGTAGAGACATCTCCTGCCAACTGATCCTGAGCAGGCAGAGAGCTTTCCCTTTTTAGGGATGGTTATTTTTTCCCCTCAGAGCTGTTTTCCTCTGCCAGTCTCTTCTGCCCTGAAGCCCCCAGTTTATTCTTCAAAATTCTGCCTGTCCTCAGGAGGTGGAACAATCTCATATTCTAGGGATGTCCTACATGACTTTGGTCATACAGGCATGAGAGAATTCTCAGTGGACAGAAGAGGGACGATAAACCTTGGTCCTTCTCCATCAACTGAGGTGACCTAGAGGCTCTTGACCTCCATCAGAGATCTTTGCACACATCCTTACCTCCTGAATGACCAGGATTTCTGACAAGAGTCTAGATGTGAGAAAGGCAGGAATGGTGGTGCAGGCCTGAAGAGAACATGAACTCCACAAGTGTCTCTGCCAAGGGGTGAGCTGACACAAGAAGCCACCTGCAGAGACAGGATGGAGCTGTGGGACAGGGCTGGCTGTCAGTCAGTAGGGAAAGACAAATGGGACACAGCAGAAGTGGAGGGAGGCCCTCAGCAGAGCCTTGAGAAATGCCAGCCCTTCCCTGACAGCTGCCTCAGAGGCTGTCCCACATGGACCAGCTGCAGTCCCAGATGGACCCTGGCTGTAAACTGCCAGTGTCACTTTGGAATCTGTGCCTCCCCATGGGCATGAGCCAGGAGAGCAGCAGCACAGTGCTTTGGGAAGGTGTGAGCCCATCAGTCTTGGAGTCTTGGCCCACAAATGCTGGATGGGAAGTTGAAAGCCATCTTCTCTTGCTTTCTGTGCAGGCCCTTCTAGAGAAAGAGCATGAGCAGAGTGCTGTATCAGAGATGCCATGGCAGACTCAGGGAGAGCTGTTGCCAGCCCAAGAGCAGCAGGAGCAGCTCAGGCAGCAGGTGGAAGAGCCACTGCAGAATGGCCAGGTAAGCCTGGCTAGCCAGGTGACAGAGTGAAGGGCAGCAAGAGGGGCATAAAACAGAGCTCTTGGGACTGAGGAGGCCAGGAGTGCCAGAGGCACTGAAAGCTCAGAGCCTTGGAATCTGCAGAGATCAGCAGTGGGACAGGAGGGTTACAGTGGAAGCAGAGCTGGCTAGGGAAGCAGAATGATATATCTGAATAAATGTGATTTGGGGGCTGAAAGAGGAAACAGCTGAGCCAGGTGGCAGCTCCCAGTCACTTACTCTGCATTTTTGTGTGTACAGAGCATCAAGGCAGAGCCTCCATCAGAGCTGCCCAAAGCTCAGAGTGACATGGAGGCAGTGAAGAGGAGGAACAAGGAAGACAGGAGAAGCATCCAAGATGAGATGAATCTCCATCAGCAGAGGGGCGATCAACAAAAGCAGGTGAGAGAAAGAGTGGCAGGCACTGCACTCATGAAACTTCCTCCCTCTGGTATTTTACAGAAGTTCAAGGAACAGCTGCAGGCAGAGCTGCAGGAAGCTGAGGCTAGGCTTAAGGCAAGGTTCATGGCAAGGATGAATAGGATGAAGGGAGAAATAAAAATCATCAGGGAGAAACATAATCGCCTGCTCCAGGATCTACAAAAGCAAGTGAGTGAAACAGTGACAGCCACTGCAGCATTCAAACTGGTGATTCCTGCCCTTCTTGCCTTTCCACTGCAGAGCAGCAGGCAAGTGGGGTGATGCCTCTGAGTGCCATCCTGCTGTAGTGTCTGTCACAGCCACTCTGAAGGACACTTCCTGATGTGCTGAATCTCAGCTGCTGCCCTGCACAGTGGGACCAGTCCTTTGGCCTTTGGGCTAGCAGTCATCCACATGGATTCCTGCTGGCCTCTTCCTGCTCTCCTTGTTTCTTGAGGTGTTGTTCCAGGGAAACATGCTGACCCAGATGCAGGATTGAAAGAAGCTGTCTGTGTCCCTTGTAAATGTGTTCTCTCCATTTCCTCACAGTCAATGACTCTTGGCTGACAGGGACAAGCTGAAGTCTCTGACTGCTTTCTTCTCTTTGACTTGAGGTGCCAGTGTTGACATCTCAGCCAGCAGCCTGCCAAGCCTTGCAGCAAATGAGTGGCAACCAAGAGCCCCAAGGTGGGCGTGAGGCACAGCAACTGTCCCCACCAGAAGTGCTGCAGGGTGACCAGGAGCTGAAGATGGTGGAGGAGGAGAAGGCAACTCAGTGGGAGGAGGTAGAACATTGGAACAAGGAGCTGCAAGTGTGTCTGCAGGCCTTGCAGGGGGAAAGAAATCCTTGGGAGGAAGTGGAATGGGCATTGTGGCAGTCATCCTTCAGAAAATTCATGAAAATGGAATATGAATCTGGTGATGGAGTTGAGTAAAACCAGCCTTTGGATTTGACCCATTCAATTTGAGGAGTGGACATCCAAATAATCGATTTGAAGAGCCCTGCATGTGGCTGACAGCATCTTCCTAAGGGCTTGCATTTGAAAAGGGATCTCGGGGCAATCTCTGCCAGCCCCCTTTCTCACACAAACTCATTGCTTGTCTCAGATCTACACAGGCTCTGTCTCGGCACCAGCTGCAGCAGCAGCAGCGTTGTGTGAAGGAGCCTTTGCTGCCCAGGCTGAGAAGTGGAGCCAGTGCAGTTTGTTCATCTCCAGCACTGACACAGCTGCTGCTCAGCAAGAGGAGAGTGAGGAGAAGTCCCTGGAGCTACTGAGTATGTCTGGGGTATTTCTAATCTGGGGGACAGTGTATTGTGTGCATGTGTCAGCACAGCTGTACCAAATGTTCCTGCTGAGTTTGGTGTCCCAGGGACATTCAGGACTGGCCAGAGGCACTGCTGGAGAGAATCAGTCTCTGTGCTGGCCATCTGTGCTGCAGAGCTGTCAGTCTGGTGCTTGGTGTTGTTACCCAGCTGACCACAAAGGGTTCAGAGCCCCAGGCACTGGGGGTGTCTCTTGTATCTCCTGGGAGGTGGGATCTCTGCTTTAAAGGGAGTATCTTGCCTTTTCTTTCCCTCAGGGAAAACAGTGAACACAGAAAATCCTGGGATGAAATACACTGAACTGGAAAATATTGGCAGCGGGTGAGTCCAACCAGTTACTGCTACAAAGCCATGATCCAGGAGTTTTTCTGGTGGGATATTTCTCAAGGGTGAAATCAGGCAAGCTGTAAACATATTCAGACACTGGGGTTCGATTGTGCCACCTCTCAGTACTGGTCAGAATTTGTGAGCGTGGTCAGAAGGCATTGTCAAAGACATCTCCATGCTGTCAAGGTCTTGCCTGCAGCAAGGAACAGCACCTGGCAGATGTCCTGGTCTCTCAAGTGTGGGACACTTCTGTGTTCATTTCCTTAGCATTTTTCTACATCTCCAAATCATAGAGGCATACCAATGAAAGGAGCAGTATCTTGCTTGCCTGAAAGAGCAACCTACTCCCTGATAGCTGTCAGATAACAGTTCTCAGGAATAATTCTTTGCAAAAGTTTGCTGAAATAATACTCTGTGGTCAGGATAAGAACTGCACAGTTTAGAATCTGCAACCCAAGATGAAAGAATAAGCTCTCTTTGTGAGCTGAGGCAGTGAACCCCAGCGCTCCAGGCACAGGCCCAGTGCCCTTGCAGTGGAGAGGAAAATGCATCATCTGCCTTCTGGCAGAGCCCTCCTGCATCCTGCAGGTTTCAGGCACTTACAGCAGACATCTCCTGTCTGGGCTGGCTTTCACTCCAACATCTAAATGACTTCTCCTTTCTCTGCTGCTCTTTTGTTTCTAGGACTTTTGGAGAGGTTTGTCGAGCACTCGACACTGTCACAGGAGGAGAGGTAAATGTCAAGAGCCCCTGCAGATTCTGCAGCTCTCCAGGGCTTTCCCCTCTGGTGGCAGCTGTGGCTGCAGCTTTGGCCAGAGCTGTGCAGGAAAGGCAGAAGAAGCACAGACTTGTGCCAGCCTGCAAAATCCATTTGGGACAGTCTTTGTCCTTTCTCAGCTGCCAGAAGGAAGGCAAGGAAGGCAGCAGTTCCTTTCAGAGAAGGAAAGTTCCCTCTCTGTCAATTGCTAAAACAAAGGGGGTGCCTTAGAGCATCTCACTGCTCTTTGGGGCTGCAGCTTCAGAATCCTGAATTCTCATTTCTGGCTGCCAGCAAATCCTGAATCTGAATGTTACTGGTAGTTCCTTAGCCACATGCAGTGCTGCATTTGGGAACTGCATGCAGGAAAAGATCTGCAAGGCATCCCAAAAAGCCCTAAGCCCTGCTCACAGCACAGGATGTATCCACAGAATACCAAGGCATGGATTGCTTCTTCTGAATCCCAGACACAGCAGCAGAGAGTGTGGTCAGAGCTTTGGGCTGATAGTTGAGACACCATTGTTACCAAGTGGACAAAACAAAACATCAGTGGCCATGTGTCCTGTACCTGGCCCCAAGGGAGCAGAGCAATGGGCTGTTGGAATGTCAATTCCTAATTACTCCAATGTCTAATCACAAGGCACTTTGGCACAGCTCAGCTCTGTCATTGCAAAATCACTCACTCCATGTGTGTTTTTGTCTGGTGCCACCAACTTCTCAAGTTACTGATTTTCAATGTCATTTTAGGTGGCCATCAAGAAAATAAATCTCCACGGACTGAGGGAGAAAGAACTAAAAGTCAATGAACTCATGGTCCTGAAGATGAATCAGAATCCCAACCTGGTCAACTGTTTAGACAGGTGAGTTTTTGTGCTTTTGTCCCAGGAATGTTTGTTTGCATACTGCCAACAGGCAAGGTGAAAACCCACTTTGGTCACTGGTAGAAATTAGAGCTGTTAATTATTGGTTAATTAGCATTGTTCTGCTCACCTCCAGTGGATGGGAACACAGTGCATCCTGTCTGCATGAGTCTTCCCTGGCACATGGAGTTTGACAATTGTTCAAAATCTTGGGTCAGCCATATCTTACTAAATCAATAGCCTGTAAGCTCACTGCCACCACATTGTTTTGAGGCTTGATCTTCTTCAAATGTCTTCTTATATCCAGATAAACTAACAAGGATTTCCCTTGGATTGTGTCCCCTCTTTTGCATTGCTCTGCATGCCAGGAAGACTAGGTGCTTTTTTCCAGAAATACCATGCATGGCAGGTTTTTATCTGGGCTGTTAGTGAACTGCATTTTTCACTTGCTGGCCATCTAAGACATCTCCTTTTTCACAGCTGTGCCTTTGTCCTTGAGACTGCACAGACTGCAAACACTGCACAGCCTAGAGGGAATGTCTATTCCTTTTATTCTGCCCTTGTCACCAAGGCACCTGGAAACAAGAATCAACCCAATTGCTGTTGCAAACAGCAACATAGCCATGCACGTTCATCTGCACACCCTTGTTTCCTTCTTTCAGCTACCTTGTGGGTAAGCAATTGTGGCTGGTGATGGAGTACATGGACGGAGGCACTCTGAGCGATGTCATCAGCAAGACCTACCTGTGTGAAGATGAGATGGCAGCCATCAGTCGGGAGGTCAGGGATCCCACCTGTGCCTCTGAGGGCTTGGGCAGGGCTGTCTGGGAAACAGGGGCTCAGAACTGGAGAGATTTCATGTGCCAAGCTTTGTTTCTGTGTTGCTGCTGTGCTATGGGCAAGCAAGAGCATCTCAAGTGAACTGCCTGCCAGTGCCCCAGAACTCACTGCACTCAGTTCCTGCACTCTCATCTCCTGCTCCTGTATTCTCACTCTGTCTCTTGTACTTGTATTTGCAGTTCTCCACCTTGCCTCTCTAAATGTTTACCTGGAGCCTGTCTGCACTGCATTCCTTGCCTATAAAAGTAAATGTGCAGGTGGCAGGATTTGAAACGAGCAACAAAGAGAAAAGAGAGACTCATTTCTCTCAGTCCTCATGTGAAAAGGATAGCAGTGCAGCCCAAATGCTGTTTGCTTCTGAGCACATCCAGTGCAGCAGCAGTCATTGTGGCTGGTTTGCAGGGCACAGTCTACAACAGCAGTTGCTGTTGCCCTTTCCAAAGCTGACATGCCTTCCCTTACCAAGGTGCTGCTCTGCTGCTGTTGGAGCAGCAAGCTCTTGCTCTCAATGCCACTGTGTTCTGACATTCCTCCCCATTGGCCTGGAAAGGGAATCTTTTAGAGCTCTTTCCTTCCTTGTGTGATCAATTCACATCACTCATTTTGCCCTCCTGTTTCTGTTTTCTCTCTCAGTGCCTGCAAGGACTGGAGTTTCTTCACTTGAACCATGTGATCCATGGAGATGTCAAGAGCTGCAACATCCTTCTCAGAAGTGACGGCTCTGTCAAGCTGGGTCAGTATATCCTTGGTCAGGTGCAGTGTTGCAGGGATGTGAGGTGTGGGGCTGCTTGGAGTGACTGCCAGCTCCCCAAAAATGGTGCTGGTGGAGTGCAGGGGCCCCTGCTGCAAGCTGAAGGCACAGCTGCAACGTGCACAGAGGTTTGACAAGGAACCACAAGCAGTCAAGAGTGGTGTTGGTCTGTGTGTGTCCCTTCCAGAGGGAGGGAGCTACAATCTAAACCTTCAGGGGAAGAAAGGACACTGCTGTGAGCAGTGTTTAAAAACCTGGGGCTTTTTGCAATTTGCAATACCAGACTTCCTTGGCTAAAGCTCCAAGGAAAGACAGGATGGACAGTTCCACAAGAGATTCAACACCACATTCTCAGGCTGAGAGTGGGGAATTCTTGTGCTTGCTTTCCTAATTTGAGCTGGCTTCCATGGTGTGTTGTTGTGTCCACAGGTGACTTTGGCCTCTTTGCTCAGCTCAGCCCTGAGCACAGTGCACACAACTCAGTGGTCAGCACTTGTGGGTGGATGGCACCTGAAGTGGTGACAGGTCACCCATATGGCCCCAAAGTGGACATCTGGTCTTTGGGAATTGTGGGCATCGAGATGGTGGAAGGAGAAGTTCCTCACTGGAATGGAACTCCTGTCCAGGTAAGGTGCAAACACTCTCTGATCCTGCTGTCTTTCTCACCTGTGCCATGTTCTCTGTGCCAATGGACAAAATCCCATTGCCATCTGCTGGCACCACTGCCACCAAGGTCCCCTTCTGAAAATGTCCCTGTAGCACATCAGCAACTGCTGTAATTTGGGTTGCATCACAAGGCAAGTGGCAGGTAACCAGTTCAGCAACTTGCCATTTTGGCCTCCAGCCATGCCTGACATTTTCAGTTGCTTTTTAAACACTGTTGGAGCTCTGTTTCTGAAGCACAAGAATTTTTCAGTGGAGAGGTTAAACATGTAATGAAGATCCTTAGAAATGGAGGTTGGACCTTCCCGGTATCAATTTTATTTCAAAACAATGCCCAAGCAGTTCTGCTTGCTTTTTCCATCTTTAACCAAAAACAGGCCAAAATCTTGATGAGTTGTGTTTTATGGCAGCTGTGCTTCAGGGACCAACAAGCACTGCAGAGATGCCTTTCTTGTAATCATCCTTGGAAACTGTAGAGTTAGTTAGGATAGCAAAGTCCCTCTTCCAAAAAGCCTGTCAAGCTGCTGTGAATCCGCAGAGAAGCAAACGTGTTCTGCTGATGTAGTTCCCATTAACTAGGACAGTCAATGAAATCAGCTGCCAAGGCAAGATGCCCTGGATGTTGGAAAAGCTGTGGCTGCATTGGGCTTTGGGGGTTTATGTTGGTATAGGAAAGTCATCTGTGCCTGTGTGGCAGGGCAGAAAGTGCCAGTGCAGAGTGGAGGTGAAAGAATGAGCTGTGGGAGAGCAGTTGCAGGTGTGAAAGAAGCAGGTGGAGCCTGGTGTTGCCTTTTTCTCCAGCCTCAACTGCTGATAGGCACAGGAGGCAGAGCAAAGCTGCAGCAGCCCAACCTGTTCTCCCCTTTGCTGCGTGACTTCCTGAGCTGCTGCCTGCAGACAGACGAGGCACGGCGCTGCTCTGCCAAGGAGCTCCTGCAGGTAAAATGCAAAGGGGCTGCAGGTGAAACAGTGCCCCAGGGATGGGCTTCTCCTGCACTGGAGCCCAAGGCATCAGATGAGCCCCCCTGGTCCTCAGCTGCACTCTTGGTGCTGTTCAGCTGAGAATGGTGAGCAATCCTGGGCTGGGCTGGGCTGGCAGGGACCTGTCAAGGTCATCTGGTCCAAGTGCCCTGCAATGAGCAGGGACAGCTTGAAAGTAGAGCTCAGGTTGCTCAGAGCCCCTTCCCACCTGACCTGGAATGGTTCCAGGGATGGGGCACCTCCCAGCTCTTGGGACAACTTGTGCCAGTGTTGCACCATGCTCCTTAGACCTACTCTGATTTGATCCCCTTTCTGTTTATAAATGTTAGCCCACATCCTATTGTAACTGGACCTGTTCAAAAGATGTCTCACCCACCCACAGAGGCCACTTTGAAGTTTTGGGAAGTGGCCATAAAATCTCCCTGGGGCCTCTTCCTCTCCAGGCTGAATAACTCCAGGTGTCTCAGGGTGTCCTCAGAGGAGAGGTGCTCTGTCCTCTGACTGTTTTTGTCTCCCTGTTTTGTCATTTGGTGGGGTGTTCAGTTTGATCTAATGGCAAAAGAATTGCAGTAGAGCAGTGTGGGGCACAGAGGTGTGAAGTGGTGTTGGAAGAAGCCAAGGAAGCCAGTCCTGGCCGAGCAGTCAGAGATTTGGCTGTGGCAAGGAGGGGCTGTGGGGGGCTCCCTGTGAGCCTCTGAGGGGCCCTGGTTTGTGCCCCCAGCCCACTCTTAGAGGTTTGTGCCACACAAACAGGGACAGCTGAGAGGGACTTGTGCCAGCCCCATCTGCTGCCTGGCACGGGCAAGCAGACGGGAACTGCCCCAGGGTCACTGCCAGCTCCTGTGGCACAGAGGGAGCTGCAGCAGCCAGTGCCACTCGGCTGTCCCTGCTGGCAAGGAAGGTGCCATCCAGCACAGCAGGGGCAGGGCATGCAAAGGTGGGCACTGCTCTGTCTCCCTGTGGAAATTAGCACAGGCTGCTAATTAGTGCCTGTCTGTCAAAGAGAGGCACCTGTGTGAGTCTTTGGAGTTTGCTGAGAGGAAGAAACCCCAGGGACAGAAAGCACCATTCCCAAAGCCCTGGCAGGGAAAAAGTCCCAGCAAGATGAAGAGACCAGAATAAAGGGATGAGTGGGATTGTGGGCCAGGTTTGGCTGTGATGGCAAGGTCCTGCACATGAAGATTGAGGTGCAGATGGGCCTGTGGGTCCTCTTTCTGCATCTTCCCAGGAGCCAGAGGAATCCTGTTTGAGCCTGTGAAGCACTGAGCTTGGAAAGTCATGCTTCATTGTTTTTTGTTGTTTTTTTCTTATGGGCAGCATCCATTTGTAACATCAATCGAGCCTGCTTCCAGCCTGGTGCCACTGATCAATGCAGTGAAGAAGAAGATGGAGGAGACAAGGATGTGACAATCATATCAAGACATTATGTCCACAACCAATTTAGAGTAGGATTCTATAGTAGGATTTTTGAGTAGTTTTCTAGAGTAGGATTATAGAGTAGGATTGTAAATAAATAAAGTTTCTGAAACCTCAACTCATTTGGAAGATTCCCCTCCTTCTGACTCTTGCAGAAAACTCAACATTTCCTTCTGAATTGCCAGTTGTTTTTTAATGCTGCTAAGGCACACTTATGGCTTCTTTGGTATGGTTTGAAAGTGGGGAAGGCTCTTCTTCACTCATCCTCTCCAGACCTCACTGCCTATGGAATGTGGCCCACTGGCTGGGTTTTGCCCATCTGTGTGACTTCCATTTGAGGCAGAAAGGACAATGGCATTTGCAGGAATAACCAAAGGGGTGGTGGGGCAGCCCAAACATCCTGTGCAGATGCAGGCCTTCAGTGGTGA
>cAme-unknown_02#UNK/UNK
GGAATGTGAGCCGGCAGGAGCCCATTCCCGGCTCCAGAGGGGTGGACACGAACAAGGTCCCTTTTCTCCTAGAAACAAAGCTCACCCAACCACGATCCTGGTGTCAGTTTGCAGGGCGCGACTACCACTCCAAATGCAGCCTGCTTTCTGGGTGGTGCCAGCTGGGCTCCGGAGTCCATCCTCGACGGTGCGGAATGTGAGCTGGCAGGAGCCCATTCCTGGCTCCATGGTCCGGGACATGAACCCAGGCCCTTTTTCATGGAATCTAAACCTTCCCACTCCTATTTCCTTATTTCCATTATAGTGGGCATTTTACTTGCTTTACATATATTTGACCTCACCTTCCTTTGCTGTTATACTTTATCAAGTGGTAACCTTGCATATATTCAACCAAACTTTATCCTCGTGTTCATTGATATTATCTCTCTGATTATAGTGTTTGTTACCATAATTGGAGAATCACTGTGATTTTCACCATTTCTATTTTTATGTGCTTTACCCCACTTAGTCCCCTGCGCAGCTCTCCTTAGGAAATTCCAAGGAAGCAGTAGGTGAGCTACCAACATATTAGACAGGTTACCTTACACTGCTGCTGAAATATAAAGGTTTATTTCTCACCTGTGGCCTTCCCTTTTGCTTGAAGTTGTTGTAACCGAAAAGAAAGCTTTGTCTTTGGACAAAACCACACCAAACTATAACAATTACTTTAAGAACACAAACCCTAAAATTTACCCAGTAAATTACACCAAAAACACACCAAATCTAAGAAAGATTCCCAAAGTCAACAAAAAACCTACTAACTACCCTCAAATCTACATCAAAAAGACACCAAACACTAATAATTATCCTAGAAAGAACCCACACTCTAAAATTATCTAAACTACACCAAAAACAACAAACCCAATTCCCTAAAACACCCAAACCCTAATAATTACCCTGAAAACTACACCAAAAACACACCAAACCCCAATAATTACTTTAAGAAGCCAAAGCCTAACAATTACCCTGACAACTACATCAAAGACACACCAAACCCTAAAAAGAACCCTAAAACCAACCCAAATCCAAATCATTACTCTGAAAACAACATCAAAAACACAACAAACACTAATAATTATCCCAGAAAAAAAACAAACCCCAGTAATTACCCTCACAAAACTCCAAACACTAATAATTACCAGGAAAATTACACCAAAACCAGACCAAACCCTAATAATTACTTTAAGAACCCAAAGCCTAACAATTACCATGAAAACTATGTCAAAAACACACCAAACCCAAAAAAGAATCCTAAAACCAACCCAAATCCAAATAATTACTCTGAAAACTACATAAAAAACACACTAGACTCTAAAAGGAACACAATGAATAACAATTACACAGAAATCTACATCAAAAACACAACAAAACCCAAAAATTACCCTAAAAAAAACTCCCAAAGCACAATAATTACCCTGAAAAATACACCAAAACCAGACTGAACATCAATAATGATCTTAAGACAGCAAAGCCTAAAAATGACACTGCAAACAACCCCAAAAAAACACAGAATATGGAAAAGCTCCCCAAAATCAAACCAAAGCCTAATAATTACCCTGCAAACTACCCTAAAAACACACCAAACCCTAATAATTACCCTAAAAAAACCCCAAACAATAATAATTATTCTGAAAACAAAGCCAAAACACACCAAACCCCAATAATTATTAAGACACCAAAGCTTAACAATTACCCTGAAAACTACATCAAAAACACACCAAACACTAATAATTAGCCCAGAAAGAACCCAAACCCTAATTCTTAACCTGAAACCTACACCAAAACCACACCAAACCCCATTAATTTCCCTTAAAAGCCTAAACACTAACAATTATCCTGAAAACTACACCAAAAACAGCCCAAAACCTAATAACTACATTAAGACCCAAAAACCTAACAATTACCCTGAAAACTACAAAAGACAACCAAACCTAAAAAGAACCCTAAAACACCCAACATCCAATAATAACCCTGAAAACTATATCCAAAACCCACCAAACCCCAATAATTACTTTAAGAACACAAAAATTACCCCACAACTACCCCAAAAACAAACCAAATAGGAAAAAGATTCCCAAAATCAATGCAAAGTCTGTAAACTAAACCAAAACCACACCAAAACGCAATAATTACCCTAAAAAACTGCCAAACAATAATAATTACCCTGAAAAATACACCAAAAACACACCAAACACTAAAAAATCCTTTAAAAACACAAACCCAAACAATTACCCTGAAAACTACATCAAAAACA
>cAme-Satellite01#Satellite
GTCCCTGGGGAGGTCACTCCACCCCAGCCCCCCCTCACAGCTCCCCCCTCACAGTCCAACCCTGCTCCTGCACATTGGGGTCCCCTGTCCCCCCGGGTCCCCCCCGCCCCCGGTGCCACAGCCTCCCCCAGAGGATGTTCCACGAGATCGACCCCAGAGCCTGACACGGGCACGGGGGGACGGGGCCCTGCGGGGTGGGACAGGGGGACAGGGANCCCCCGGCAGTGTCCCCGTGTCCCCCAGGGCCAGAGCCTGGGCCAGGGCTCCCTCACCCTGTTACCAACGAGNGNTTGAGATTGCTTAAAAAATCACCGGCAAGGGTATCAGCAAAANCCAGATTTAATATTAAGCGACAGCACGACAAAGTTCGTTGGCAAGGTTCACTCTGCTNCTGACTGGACANTTAAGGCACAGCAAGGAAACAAAGCAACAACAAAACCAAACCAAATCCAGGCAATCAAACCAGAAATGAACCGAGAACTGTCCTNGGGGTGTGCGTGTGTGCGTGTGTGTGTGTGTGTAGGACAAAAGGACAGTGAGGGCAAGGATAAAAGGAATACGGCCTAAAAGCTTAACAGCGCTCAAACTTAACAGGACTTAACTTAACCTNAACCTTAACTNATACCTTAAACTTNACAATTTAGCAAAGGAACAGCACTTAACAGTATTTAACCTAACTTATAACTTGTGACTTAGCAATTTAACAGAGGAATAACACTTAACAGTATTTAACTTAACTTATAACTTNTATTAAACNTAACAATTTAGCAAAAGAACAACNCTTAGCAGCATTTGACTTAGCTTANACCTCATGACTTAACCTTACTTACAGGCCTGACTNACTCAGATATCCNAGGCACTCAAACNCCTNCGAGAGCAGCATTTCTNCCACATNTGCCANGGCACAGGCACTCATGTGTGCACACACACAGACAGAGTCAGTGCAGGGGAGCTGTGAGAAATTCCCCTGCAGGGCAGNGAAATGCTCACTNCGGATGCTTTTGCATCTCCCCAGCGGGTGAAGGGTCGGGCCTCGAGGAGTGGGGGGATCGGCCCAGGATCCGTCGCTGTTCGGGGATGCCCCGAGTGCAGCACACGGGAGAGTTCCCGGCTGGCAGAGGCCCCGCTCAGAGGGAGGNCGCTGGCCCAGGAGAGCTCCAAGGGNCTCATTTGGCAGCGCTGTTNGCAGGGCCGCAAGAGAGTGGGCTTTAGNCACAGCAATGTTCCATCCTGGACATCCACAGCTGGGCATCAGCAGCTTTCTTTGAAAGTGTGAGAACAGGGATGTTGTGCCNCTCAGGCAAGANAAACAGTTTCCAGGGCTGCTCATNAAGAAANCAGGAGCTCGTTGGGCAGCAGCAGTTCCTGGGAGCAGACAGTGTTTCTGATGAGCTCGAGAGGAGCTGAGCCCAGGTGCTGTTNGTCAAGGCCGAGGCCCAACGAGCATTTCTCAGATCNCAGTGCGGCCTGAGAAGGGCAGGGGGGAATGAACCAGCACAGGGCCCATGGAACCGAGGGACCATTGTGACACTGNGGGNCCTCGNGGCGANCAAGGGANCACTGTGACACTGCGGGGCCTGCTGGAACCAAGGGGACCATTGTGGCACCCCGGGTGCCCCCCGGAACCGAGGGGNCCTGGGGACACCGNGGGGCCCGGTGCAACCAAGAGCCCCTTGTGACGCTGCGGGGCCTGGTGGAGCCGNGGGCCCAGGGGCACGGAGGGCGCCCCTGCAGGGCCCGNTGCGNCCGAGGGGGACCATTGTGACACCGCGGGGCCTGCTGGAAGCCAGGGANCATTGTGACACTGTGGGCCCCTGGAACCAAGGGGACATGGAACAGGTCTGGCTGGNTTGGCCTCCCAGGAAGGCCGCCTGACAGGTCCGGCTGNCCTTGGAACGTCGAGGGCTGCCTCTCATCTGCCCCTGAAACACTGGGGCTCCGTGCTTTCCTTCCTATGGAAAAGAACCGTCCNTCTNTCCAGGCGCCCATGGCCAAAATTGGGATTCCGCCTCCAAATTCCCTATATCCAAGGATTNCTCCCAGACGAAAGCTGCCAGGACAGACAGGTCTGGCTGGCCTTGGCCTCCGGGGGCCGCCTCTCATCTGCCCCTGAAACACCGGGGCTCTGTGCTTTCCTTCCTATGGAAAAGAACCGTCCTTCTTCAAGGCGCCCGTGGCCAAAATTGGATTCCGCCTCCAAAATTCCNTATATCCAAGGATTGCTCCCAGACAAAAGCTGCCAGGACNGACAGGTCTGGCTGGCCTTGGCCTCCGAGGCGTCTCACCAAACACTGGGGCTCNGTGCTTTCCTTCCTGTGGAAAAGAACCGTCCTTCTTGTCNAGGTGCCCATGGCCAAAATTGGGATTCCACCTCCAAAATTCCCTCT
>cAme-Satellite02#Satellite
CCCCATTTCAGGGGGTCCCAAAATCCCAGTTTTACCACTGCCCCTCCCCCACCCCACCTTCACACCTGTCCCCTGCCCCGCCCCCAGCCCAGGCCAAGCCACGCCCCTTTTTGAACCCTCCGCTCCTGACCAATCAGATCCCTCACACGTGTTCAGGCCACGCCTCCTCTCTGTTGGCTCACAATGGGGAACGTTGGACGCTCCGCCCCTCCAGAGGATTCTCAATGCCCATTGGCTGCCANCAGAAGGGGCGGGGCTTATGCTGGGTATATAAGGAGCACCGGGAGGGCAGATGGGGCTCAGTGTGAGACCCAGAGCGGCGGTGTCAGGAGGAAGGAGAGGAAGAGAAGGAGACCCCTGGAGCGGGCAGAGACCCCCGGGGAGGAGCAGNCAAGATCCCCAGGGCAACAAGAGACCCCCAGGGTGGGGCCGAACAAAACCCCGGGGCAGGGCAGGCGGAGATATCCCNGTCCCACCCCCACCCCCATTTCCATATCCTCACACATGATGAGGGCAGAGACCCGGACACCCCAAAGGAGAAGAGCAGCCACGGGCACGGAGACCCCACCAGAGACTCCTCCGCTCCACAGAGACCAGCCCCAGCAACACCAAAGTGAGTACAGAGGTGACGTCCTGACCCCCTCCCAGTAAGGGGAGGAGGATGGAGATGACCCTGACCCCCCAAACCCCACACAGGAAAGGGATGGAGATGGCCCAGAACCCCCACAGCAGAGGAGCAGNGATGGAGATGGAGACCGCATCGGAGACTCCTCAACGTCATGGAGACCACCCCCAGCCTACAAAAACGTGAGTATGAATGGAAACCACCCAGTCCCCTCTCACCCCCAATTCCATATCCCCACNCAGGATGAGGGTAGAGACGTGGACCCCCCAAAAAAGAAAAGCAGCCACAGGCGCGGAGAACTCACCGGAGGGGTCCAAAGCAGGGTGGAATGGACCCAAAATAGGTGGAAAGGAAAAAATAGGGGGGAAAAGAATTCAAATAAAGAGAAAANACTCAAAATGTGGAGGAAAACACAAACTTGGGAGAAAGGACCCAAAACGTGGGGGAAAGGATCCNAAATTGCACAGAAAGGACACAAAATCAGAGGAGAAAAGGGTGTGGTGGGATGTTGTGGGGTTGGGNGTCCAGGGTGTCCCAGGGTGTCGNGATGTGTGACCCTACCTGTGCCAGGGTGGGTGCAGATGCTCAGTGCCTGGAGCAGCCACAGAAACATCCTGAGGGACACGGGGACANCCTGCAGGACACGGGCCCGGGACATTCGGGACTTTGTCCCTGTTGGGGGCAGGGGACATAGGGGAAGGGAAAGGGCACATAGGGGAGATGGGGACACAGTTCCACAGGAGGGACAGCGACACACGGGGCAGGACAGGGACAGACAGAGGGGTGACAGGGAGCCACNGCACAGCATGGGGACATAGAGAGGGGAGGGGACATGAAGCCACCAAGACACACATCAGGGGACAATGTCACCACACCTGTGAGGACGCTGCCACCAGGACACCTCCATTGANACCCAGCATGGGGCCACGTGCCCCCCTGGGGGACACTGACCTTTGCTCTGTCCCCATGGGCACCTGGGGTCCCCTGAGCACGGTGGCCCTGGGACACCCTGGTGGCTGTCACACGCTTCCAGGCCACTTGTCAGCAGCTGAACCAGTTCCCTGTCCTTGCCCGGTGGGGGTGACATTGGGCAGGCACACTGAGGTGGTGACAGTGGGGACGTGGTGGCAGGAACTGCATTGGGCAGCACATTGCCATGGCCGAGATGAAGGTGCTGCTGGCCCTGTGGTGGCACAGGTGGTGGCATTGATGTTGTCCCAGTTCATGTCCCCATCCATGTGCCCCACGTCCCCACCCATGGCCATGGCCCCCCATGGCCCCCCCATATCGTTGTCCCCCACATGTCCCCATCCCTGCCTTAGTTCGACGTCTTTATTTCTACCCCACTTTCAGGGCTTTCAAAGGGATGAACAGAAAGGAAAAGACAACCACAGCCAAAACAAACGTGTCTCCCCCAGCACAGCATCCTCGTGCTTGGATGGGTGGGAAGAACATTTTCTGGAGGGGTTTCCACCCCACTGTCCCCACAATCATGGTGTTTGCCCCCTCAGTCCCAGTTTGGCTGTGGAAGATGCCTGTGGGCCAGAGAGAATTAAAACGATGGATTTATGGTGGAGAAGACCTCCATGGCCATCCAGTGGTGCTTGATGCCAACAGAAGGTGCATAAGGCGAGATTTTTCTGGGGTCAGAAGCTGACAAATCTCCTGTCCACAATGGATTTCTGCGGTTGCTCTGTGGATGTGTCCACATGCCCACAGGGAGCCAGGAGGATGTGAAGCCCCCAGCCANGNGTCTTCCCACCACGGATCACCAGGACGCTGCCCACTGGGGCTCACTGGGGATCATCCAGCACGGATCCTCCCATGTGGGATGGAGCTGGAGCAGCACACGAAGCTCTTCCCGCACTCGGGGCACTCGCAGGGCTTCCCTCAGTGCTGGCTCCCTTGGTGTTGGGCCAAGGCTGAGCTGTGCCTGAAGCTCTTCCCACTCTCCCCACACTCGTAGGGCCTCTCCCCGGTGTGGATGCGCCGGTGGGTGACGAGGGTGGAGTTGTGGTTAAAACCCTTCCCGCAGTCGGGGCAGCAGAAGGGCCTCTCCTCTGTGTGAATCCGCTGGTGCAGGAGGAGATGGGAGCTGCTCTGAAACCTCTTCTCACACGTGAGACGATCCTGGGGCTGGAATTGGGGGTCTGAAGGCTGTTTTGGGGTACCTGCTGGTGACAGAGATGGGAACCCATGCCAGGTCAAAACCTTCTCAAGATGATCCCGGCAGAATGTTGGGAGCTCCTGTTGGAATTTTAAGGTGCTGAGAGGATTTGGGGGGTCTGTACGGNGTTTTGCAGTCTTGGAGAGTTTTTNGAGCATCCCAAGGATGTTTTTGGCATCCTGGGTGAGGTTGGGGTGTCCCGGGGCAGGTTTGAGGGGTTTCTGGGAGGTTTTNGGNGTCCCTGGGGATGCTGGTGACAGAGCTGGAAACTCCCTGCCAGGTATGAACCTTCTCACTGCAAACGGGCAGTGTCAGCGTGTTCGGGGAGATCCTGGGGGAGCTGGGGGGTTCTCCCCAAATCCCGGGGGGTTCCAAATGCTAAGGGACCCCCCTGAACTCCCCTCACTGCTGGATNTGCTGCAAGCGTCTCACCTAAAACCCTGACAACNGTGAGGAGTGACAGCCTAGGAGTCTTCCTCACTGTCTGCCACGCTGGNCAGAACACCCCAGGCAGAGCACTGCACGAGGGAGCTTCCNTGGTTTCCTTCCCCTCCTGTTTGCATCAGGGACACATTTCCAGAGACATTCCTGGCAGGAGTGCCCCAGGTAAGATGTGAATTCTTCATCCTCGATCTCATCATATTCCCAGCCCCTCCTGGTGACCTGGGCAGTGCCGTCGGACACCACGAATCTCCCGGATCCCAGCTGGGGGGGGAGAGGAATTCCCGCCCGTCGTAGCCGAGCTGATCGGATCCACGGATGCTCCCGTCGGACAGGAGGTCACAGCCAGAAACCTCCTGCAGTGTGTGGAGACCTGGGAAGGGATCAGACCCACGGAGGCACACGGAATTGTGTCACAGCTCCACGGAGCCCCACGGCTCATGGGTGATGGGAAGGCAATGAAGGTTCTATTTCAGGATTTGAAGAGGAGTTTTGATCGTGTCCCTCAGAGAATGCCTGTGGAGCAGGAGTGCAAGTGTGAGAGGAGCCAGGACAGGGTGTGCTGGGTGAAGAACTGTCTGATATACTGGTTTTCAATGGGATAGGATCCATTTTCTTGCCAGGAAGTGGCACACAGATGGGTTTGTGTGAAAAACAGATACGGTTTCCTCACCCGGAATGATACCAAGGAAGATGTGTTTATCCATCAGAGTTCTATAAAGAAGAACAACCCCAGGAAATACCTCCCCAGCGTAGGAGAAGNAAAGCATTGTTTTAAGCAAGCATACGTGTGCTTTTTGTAACTGGCTAAANCAAACGTCAATGTGCTTTTTGCTTTTTTGCCATAGGCTGAGAGAATTTTAAAGTGCATCGTAACATAGAACTCAGCGTCTGTTGTCTGGAACGTGAGCTGCTGTCATCTTCCTAAGGTCTCAANCATGTNATGAGNCTTTTGAAAAATAAAAGATAGCTCGAGACACGTCCAGCGGCAGTCCCGTCTCGTTCAGAAATTGTAAATACTGCTCCACTGGCTGGCACATCATTGNACTCTTGATTCATACCAGTGCAAGAGATGTAGAATCACCTAAACTGAACACAGAAAGAAACTCCCTCTGACAGCCCATTTTTGTGTTCTAGATCATTTTCAAGATGTCCACTGAGAGGTTGGAGTGATTATCACACAACTCTCCACTTCTGGCTGCAGGCTCTGCAGATTCTTTCTCTNAATTCAGTCAGGCTTGTCTTCCCTAACAATTCCTGGTACCCCCTCATGTTTCCTTAGGTTAGAACAGGAACACTGAAAACCTTACCAATGGCACAACTCTCTAGTGCACCAGGAAAATAAAGGGCAAGTTACCGAGGTCTGCAAACATTTGTCCTGNTTTGCTGCAAGAGTTGTGCTGCACACACAGTGTGGAAAGCCAAGAGAAGCTGCAGGTGGTGGCACACCTTGTGCCAGGAGCTCGAGCTAGTTCTCCAGGAAAGGTTCTTGAGAAGAGCAGACAGGACTGTGGAGAAGATTCTTGGAAAACCTTGCAAAACAGCTTCCCACACGTGAAATGAAAATGGACAGAACCAATCCNAGATGTTCACAACTACTCTTAATCCCCTTCCTTATATGCTCCCGTTTTCTNTGTTGCACTGGTTCCGCATGATCACAGTCATTCCAATCTGATCTTACCTCGAAGACCTAGGACTTTGCAAGTTT
>cAme-Satellite03#Satellite
CCCAAATCCCCCAAGGTCAATTCCCAATCCCGGAATTGGGGACATTCCCGGGATTCCGGAACGTTCCCGGCGCCGGGATCGGGGAATTCCCGATCCGGAATTCCCGAATTCCGGAATTCCCGATCCCGGAATTCCCTCGCTCCGGAATCCCCTGGGATTCCCGGATCCCGGAATTCCCAGATCTGAATTCCCCGGAATTCCCACTCGGGAATCCCTCCCGATGGAATTCCCGAACTCCGGAATTCCCCCATCCCGGATTTCCCAGACTCTGGAATTCCCTGGGATTCCCAAATTCCGGAATTCCCGCCCCCTGGAATTCCCAAATCCCGGAATTCCCGGATTCCGGAATTCCCACATCCCGGAATTCCCAAGCTCCGAATTTCCTCGGAATTCCCACCCCGGAATTCCCGAGCCCCGGAATTCCCCGGAATTCCCAGATCCCGGAATTCCCGGCTCCGGAATTCCCTGGAATTCCCGATTCCGGCATTCCCACCCCCTGGAATTCCCAACCTCCCCGGAATTCCCACTCCGGAANTTCGGGAATTGCCNCCGAAAAAAAAAAAAAAGAAAAAACCCANCCCAGGATTAAGAAAAAAAATAAAAATGGGA
>cAme-Satellite04#Satellite
GAATCCTTTTGACATAAAAGAAAACAGCCGGAGAAAGAAAAAAATTAATGCCAAGTGCAGCTGGGGAGGCCCAGANTGGACAGGAGGAGAAAGGAATTTCCGTGGCAGGGCAGGGCTGTGGTGCAACACGTCCCCCAGAAGGAGTGTGGAGCAGCCCAAGGCTCTGTGTGTGCAGGCAGAGGCAGGCAGGACGCAGAGCTGTCAGCAAAGGCAGGGCCCAGCCAGGTGGGGCAGCCGGGGGATGAGGACAGCCTGCAGGGACAGAGGCACAGGGCAGGGACACCGTAGGACAGCCTGGGCTGCAGAGGGCACAGGCATGTGCAGCAGCTGCAAGGCCCTGACAGAGCCAACTCCTGCAGCACTTTGGCCACGGCTGCTGTCCCTGGGCCTGAGGCCAGCAGGGCACAAGTGACCCTGGCAGCCCTGGGGCCTCATTGCCTCCTTGTCCCTGCTCAGCAGCCTGGCAGGGGCTGCCCCATGGTNCTGCCCTTGGCATTGCACATCCCCACATGCCAGTGCCCCGGGAAGAGCCCTGAGCACTGAGGGAGGGACAGGATGTGCCTTGCCAGGGGCTGGGGCTCAGGCCTTGGCCCTTTGCATTCCTGAAACACATCCAGGTTTGCTCAGCACCAGAGACACCTTTCCCTTGTTTGTCCCCCCCTGTCATCAGTGCCTGCAGTGTTCTGCTCTACCTGGAACCTGGGGAAACTTCCTCAGTCGTGTCCCTCAGNAGGACCCATTAAAAGTTCAAGAAACTTTANTGTTTAAATTTAACTTTGAGTTCTTGAGAAGTTTTTAATCACACTCTGAGGGACTGAGTCTGATGTAAACAGCACCAAAGTCCCAAGAGGCTCATTAAAGTCCTGGTGCTGTGCTGATGAGCTCCTGGCACAGAGGGTGATGCTGGCAACCAAGNAGAGCTTCAAAAACACATTTCTGTGGCTGAGCAGCTCTTCTGCCAGCCCAGCAGGGCTGGGGCACTGCCTGCAGCCAGCGCGGGCACAGCACAGAGGCACAGAGAGCTTCCATCAGTCAGGGCTGGCAAGGTGCTCCGAAGGGACTGGGGCACAATCACTGCCAGCCCTTGGCACAGGAACCTCTGGCTGCAGGACAATGCAGCTGCAGCTCCTGCAGAGATCTCCTAAAGCTGCACCATGCCAGTGCCTGCAGACTCTGTGAGTACATTCTCTGATTCTCTCTGGTGCAGGGGAGGTGAAATGCTCATGAAGCTCTGACATGCTGAGGGTTTCTGATCAGTCCTAGAATATTTCCAAGACAAGGATTTTGATAAAAATGATNAAATTTCCTCAGACTTTGTNTTCAGTTTCCTACTATTGGAGAATGGCCAGGGGGTCGGGGGGATAAATAGTAAAGGTATTATGTATTTTGACAAGTGCCTGAGACATCTGAACTCTCACTTTTAGTGATCAATAGGTTCACAGGAGATCCCCAATGTGCTTTCAGCCACTCCCCTGCCCATGGACAGCACCAGCATCCCCTTTGCTGGACCTTGCTGCAGCCCCGGGNCCAGTTCCCTCTGCAGAGCACAGGGCTGGCAGCAGCTGCCCGGCACTGGGGGCTCTGGCAGGGGGCACAGCTGGCTCGGGGTGACGCTGTCCCCAGTGCCCGGCTGCGGGNAATGCTGTCAGTGCAGCCAGGGAAGGAGCTGGGTCTGCCTTAATCCAGGGCCATCATTAGGACACTTGGAAGTCTCCCTGAGATTTCAGTCCAGGCTGGGAGCTTCAATCCAGGATGCAAACCTGTCCTGGAGCATCTCTGTGTNATCTGCAAGACCCACGGGGAAAGGCAGAGGTGTTCTNACACTGAAAATGCTGTTGGGTTGGTGAAATGAGCAANGTGAGTCCTTGGATACAAAAGTNGTGCTGGGCTNTGGTGGANCCATCTGCTCTGGATATTNTGATAACCAAGAATACCAGGAGAGACATGGGGGGAGCTTAAAAAAAAACCTCAGAANTCATAAANACGAAAAGTGTCTGTGACGTTACAGAGGAGGGTGNACGGGAAATGATTTGATTTTGGTTACAGGTATCTCCTCTAACTCTTCACTGTCTTTTCCTCCACGAACAGGTCCCCNTGTCCAGCCACAGCAAATGTCCAACAGCAGCTCCATCAGCCACTTCCTCCTGCTGGCACTGGCAGACACGCGGCAGAGCTGCAGCTCCTGCACTTCTGCCTCTTCCTGGGCATCTCCCTGGCTGCCCTCCTGGGCAACGGCCTCATCATCAGCGCCGTAGCCTGCGGCCACCACCTGCGCACCCCCATGTGTCTTCTTCCTGCTCCACCTGGCCCTCACCGACCTGGGCTCCATCTGCACCACTGTCCCCAAAGGCCATGCACAATTCCCTCTGGGGCAACCACCAACATCTCCTACACAGGATGTGCTGCACAGATCTTTTTTCTTTCTNTTCTTCGTCTCGAGCAGACGTTTTCCTCTCCTGACCATCATGTGCTACGACCGCTACGTGTCCATCTGCAAACCCCTGCACTACGGGACCCTCCTGGGCAGCAGAGCTTGTGCCCACATGGCAGCAGCTGCCTGGGCCAGTGGCCTTTCTCAATGCTCTTATGCACACGGCCAATACATTTTCCCTGCCCCTGTGCCATGGCAATGCCCTGGGACAGTTCTTCTGTGAAATCCCACAGACCCTCAAGCTCCTCGCCCTGCTCNAAATCCTACCTCAGGGAANTTGGTCTCTCTTGCTGTTANTGCCATTTTTTGGCACTGTGTGTTTCGTGTTCATTGTTTTCTCCTATGTGCAGATCTTCAGGGCCGTGCTGAGGATCCCCTCTGAGCAGGGACAAAGGCACAAAGCCTTTTCCACCTGCCTCCCTCACCTGGCCGTGCTCTCCCTGTTCNTCAGCACTGCTCATTTACGCCTACCTGAAGCCCCCCTCCATGTCCTCCCCATCCCTGGATCTCTGTGTCCCCGTCAGTTCTGTACTACCCGTGGTGTCCAGCCCCGAACCCCTCATCTACAGCCTGAGGAACCAGGGAGCTCAAGGCTGCANTGTGGACACGGCAGGACCGGATGGTTTCAGAAACATTAAACCGCTGGCCANATNTCTGGCAAATCACTTGTAAATAAAAGCAAATCTCTTTGTACGCTTCTTTAGTTTTCGTTTATGGGTTCTTTTTCTTTGTTTTAATTTTTTAATATATCGCCAAATAAATGTCACGGTTTTTGCCATTTCTCTTTCGTTTCTCTCCCCCTCCCCTGTGACCCACAGACTGTGTCAATGAGGGGCTGCGNTCTGGGTGGCTTTAAAGNAACTAAAGGATGTGTCAGCAGAGTTTTCTGCAGAGATGCCCTTTGGTTGCCTTCTGTGGAGCTGCAGCAGCAATGTCTGTGTGCAGAGGTG
>cAme-Satellite05#Satellite
GAACCAAGTGTCCACTGTTCTCCATTGGGGCCTCATGGAACGCTGGAGACCATTGTGACCCAATGGACACGCATGGAACAAAGGCTCCACTGTGACCCAGCAGGGCCTCATGGAATCCCGGAGACCATGGGGACGCANTGGAAACGCATGGAACCAAGGCTCCCTTGGGACAAANCTGGGCCTGATGGAGCCAAGGAGACCACTGGGACGCAATGGAATCTCAAGGAACCAAGGGTCAATTGTCAACACCTCAGGCTCTCCTAAAACCAAGGAGAACATTGTGACGCAATGGANTCTCATGGAACCAAGGCTCCGCTTGGACCAAGTGTGGCCTCATGGGACACAGGTGCCACTGGGACATTGCCAGGCCTAATAGAAACAAGGTTCCATTGTNGCACAGCAAGGCCTCATGGGACCTAGGAGAGCACTGTGANACAATGGAATCTCATGGAATTCCATGAGTCCCCGCTGTGTTTACAATTGACACTTGGCTCCCCAAGATTCCATGGTGTCCCNGTGCTCTCCTGGCATTCCATGAGGCCGTGCTGTGTCACAATGGACACTTGCTTCCTCCAAGGCTGCAGATGTCCCAGTGGCACCGGGTTTCCCTCAGGCCGCACTTTGTCCCAATGGGGCCTTGGTTCCAGGAGAATCCATTGTCCCACAGTGTTCTCCTGGGTGCCATGAGGACTTTCTTTGTCACAGTGGAACCTTGCTTGCACAAGCCTTGGCAATGTCCCAGTGGCAAATTGTGCTGGCCAACAGCTGGCCTGGAGGCCTCACAGTTATAGATAACCTAATTATAATTATATGACTAATATATAACTAATCACATAACTAATAATGATATAACTCACCCACTCTAGGCCATCAGTAAACCAGTCTAGGCCATTAGGGACGCAGACAGCTCTTGGCCAGTTAGCCGGGTGGTAACAGAATTCAGACAATCAGGACCAACCGTGCGGGCTTTCGATAACTATATAAAGGGAACTGCACTCNATAAAAATTGGCTGTTGTCACATGAAACTCGAGTGTCGTGTCGTGTGTCCGTCTCAACTGCGA
>cAur-Satellite01#Satellite
CACACAGGTACAGCTGTTTGGTTGTGGTTAATGTATTTCACAACATGCAC
ATTCAATACAACTTTAACAGTTGAATCAAGCTAGAATCTTTTAAACATTG
ATTCAGCTTAGGAAAGAGCTAATGCCTCAAGGGCAGTTCACCTGCAAGGG
GAATCTATGGCTGCTACAGAGGCGGCTGGCACAGAGCTGTACAAAGAGAC
TTGATAGGAATCAGCCTTTGTGCTCAGGGCACTGCCGCCTGGGACCTTTT
TGGACACTGCAATTATGCTCCAAAGCACAGAGTGCAGCCTGCACAAGTGA
AACAAAGCAAGAAANATGGTGCTCAGNAGAGGAGCTGTGCAGAGTGTGNG
TGTGGAGGGGAGAAGCAGTCTCCCCCTGGAGCGGAATTGTTGGGGCTGAG
GGAGCGGCTCGCGGCTCACGGGCTCGCAGGGCAGCTTGCTGGGGCTCCGG
GCGAGCAGTTGACAGTTCTGCAGTGCTCAGGGTGGGACGAGCGGTTCTCA
TTCGTCTCGCCACGGCTCCAGCAGCTTGCACCAGCACCTCAGGTGTCACA
GGTGGAGCAAAGCAACTTTCTGGCTGCAGACTCAGGCAGCAGGCATGCAG
AGGCTGCTCTCGAGTCCAGCAGCATTCACCCGCTGCAGCTACAGCGTGTT
CCGGTTTCATGTGGACAAAATAGGCTCTGGGGAACCCCAGGGCTTCTTGG
TAGAACAAGGGAGAGTTGTTTACCCTCCTGGCTTGGATTAATAAGGTGCT
GAAGACAATAATGGCCAATGGCAGAAGAGAAAGAAAGAGAGGAACAAGAG
AGTTCAGCCTAGAGAATAAAGTTTGCCCAAGCCATGGGAAGCTGCACAGG
GAGTCCATAAGCGTGGCAGCTGGCCAGGCACAGCTGCAAACTGTGCACTT
TGTTTCCCTTGACCACAGGACCTGCCTAGACAAGCCTGGGCCTGTCCAGC
TTTGCAGATTTACCAGCACCTTGCCTTTTGTCTAGTATTGTGCTGAGCAC
CCCAGCTCCACGGGGAGGGGGTGCAAGGGGGTTTGTGTTTGGGCATGTTC
AGACTTGTGCCTCCAGGACAAGCACGTGTAAGCTTTGGAGTGATCCATTC
CGTGTCCATGCAGGTTATTAAAGGATCCTGTTCAATGGCCATGAGTTGTT
TTGATTTCCTCACTTGACCTTCAAGACTCTCCCAGGACCCCTCAAGGACA
CCTCCCTGAACTGAGCACATGGCTCCAGCCCTGGCCCTGGGAAGAAATGC
CCCCAAAAGTGGCCTTTTGGGAAAGAAATGTCCAAGGAAAACCAACCAAA
GACAATACTTTATTAGGGTTGGGGTTTCCATTCTAATTAGGCATTATCCT
TGGGATGAGGTTTTCCTTTTACCTCTAGGAAACCCAAAGTGTTGAGGAGC
AAAGAGCCAAATCCCAGCCCAGCTGCAGTCTTGCCGCCGGCTGTGCTGAC
TCAGCACTGTCATTCCTCTCCTCAGCACTGGCTGGTGCAGAGAAGGGCAG
GGGAAGGCCCCCCCAGGGGGGTCACGTTTGGCCTGGCAGTGCCGGGGTCG
GTGTATTGCTGTGTCCCCTGGGGCACGCTGGTCACCGGCGTGGGGGTGAC
TATGCCAGGTGAGGGAGGAGCTGCGGATGAAGCCCTTGCTGCAGCCTGTG
CAGGTAAAGNGCTGGCACCGGTGTGGGTGCAGCGGTGCTGGCTGAGGGTG
GCCATCTGAGTGCAGCTCTTGCCTCAGGCAGCTCAGAGGTGCAGCTGCTT
CTGGCTGTGGACGCAGCAGTGCCGGCTGAGGTTGGAGCTGAGGGTGAAGC
TGTTGCCGTAGTCACCACTGACAGAGGGCTGGGCACTGGGCTGGGGGCAG
TGGGGCTTCACCAGCTCCAAGCTGGGTGGGAAGGAAGCTCTGCCCACCCT
CAGGGCACTGATGTGGCTGCTTGGGTGGCACAGAGGGGCTGATATGGGTT
TGCCCTCTTCCTCCTCTTCATCTTCCTCCTCCTTCTCTTTATTCTTCTCC
TATTCCATATCATCCTCCTCTTCTTCCACATCATCCCCTTTGTCCTCCAC
ATAATTATTGTCATCCCCTCCTCCTAATCCTCATACACTTCATCCTTGCT
GTCCTCAGCCATGTCTCCATCAACCACTTCTNCTCTTCCTCAAGGCNGAG
CTTTGGCTCCTCCAAATTATTCTCCAGGNAATTCTTCTCCTCCCAGATCT
TGTCCAGGTCCTTCTGGGAGGCCATGCTGCTGAGAGGAATGGTCACCCCT
GTGCTCTTGGGCAAATCCTTGGGGACCAAGTGACTGAGAAGTAAGGACAC
TGTGTGTGACTCCTTGCAATGGAGGGATCAGAGCCCTAACTCCTGTGCTG
AGTCCCCTGGTTGTAGTGCTGATGGGGCTGACACCCCAGGACGTAGCCAT
CCCAACCATCCCCCTCTGGCCATGCAACTGATACCTGACCACCTGGGGCT
CAGGCAGGTGAACTCCTACATTCCCATCACAGCCAATGACCCTCAAAGCT
CCACAAGTGGTGAAGTGTGGTTTGGGAGGAGGGTCTGGAGAGGGTTGAGA
GGTGCTCAGGGGTCAGCNGGAGCCTGGGATCTTGCTGCTGTGCCAAAGTT
GGGTTCTTTACCTTCTGGCCTGTTCCAAGGAGCAGATCTGCAAACTTTGC
TCCTCCCCAGCACAGAGGAGCAGGGCTGATGGAGAGAAGAGAAGGATATG
AGCCCAGGCAGAGAGAAGCAAAGGGTTCAGAGGAGAGGACTGACCTGCAA
GGAATGGCTCAGCCCTGACCAGGGCTCTCCCAGCCTTGCACTTCTCTCCC
TATGGCTTGGGGGTTTGTCACCTCCTGCCAGCTCAGTGCATCTGTGCTTG
GATCACAGCCAACAGGGAGCTGATAGAAAACTTTGGAGGTCAAAAGCTTC
AGGGTCTGTGCAAGTGGCAAAAGATCCCAGGATGATTCAGCATCCAAGGT
TCTCCAGATCAGAGAAACACCTGATGGAAGTCAATGATCTCCACCTCTCA
AAACAGTGACCCTAAAGCCAGAGCCTTGGAGCTCTCCTGGATCACAGCAG
CTGTGTCCAGCATCTCCCCCACTCAGACATCTCTCAGGCACAACCTGCAC
CAAGGGCCAGCACCAAGTCAGACTTCTCCAGGCTCAGTTCTCGTCCTCTG
AGAATGTCGAAGCTTTGTGAGTGTTTGCCCTGAGCTCCAGCAGAAGGAAA
CTGAACTCCAGGGCAGCCTCTCTGCCAGCCACCTCTCCACCTCTCTGTGT
CTTTGGACAGACACCTTTGCTGTCACCATGNTCGGGGGCTCTATGTTCCA
CTGGANGCAGCCAGCTCTGTCCCTGTGTCTGTGTGCTTGGTGCTTCTCTC
CAGGCACAGCCATAGAAAGAGATTTGAATTCAGGATTGGTTCATGAGGAA
GGGCTGCTAGGATCCAACCTTTTCCTCTGCTTCTCACTCTCAAGAACTCT
TGACTGGCTGAGAAATCACAGCCATGGCAGAACTTGTTGGCTTTGCCTCA
TCCTTGTGGACAGGCAAGCTGCTGAGAGACAGCTTGTGCTGAGCAGATGG
TTCCAGAGGCCTTGGATTGCTGAGGCAACTTTCTCAGCCTTGGCTTTGCT
TGCTTCCAAAGAGCAACAATTCTTCTGTGGCTGTGTGCAGGCAGTTGTCT
AAGGAGAGCAGGGGGCAGCTGGTGCCATGGAGCTGTGAGCTCCAGCTGCA
GAGAGCAGTGGAGAAGTCTGATGCAAGGAGCAGGGATGGAAGGCCCAGGT
GGGCAGGGACAGCAATGGGGAGGTTGGGGAGGGTGAGGAGCAAAGTTGTC
CACTCAGTGTCAGCCCTCAAAGGACAGCTTCTCCTCCCAGTCCAGACCTC
CTGAGCAGACAGCCTGCATCATTCTGGCTTGGTGGATGCTGCTGTCACCT
CTGCCCTCA
>cAur-Satellite#02#Satellite
GGTGCTCACCTCAGCACTACCCAGCACCCTCANCAGGACACCAAAGCCTC
TCCTCAGCCCTGGCCTGAGCCCCAGCCCTGAAAGGCATCTCTGAGCCCTC
AGCCCTCCCCTGGACACCTCAGCCCAAACCTCCTTCCTGTGCTCTGACCC
CTCNCCTGCATCCCCTCCTACCCTTGAGTGACTCTGCTTGGCCCCTGGCA
CAGGGCAGGGGCTGGGAGCTCCCAGAGCAGCCTCATGGCCTTGGAAGAGG
AGCAGGAGGTGGCCTGTGGCTGAGCAGCTGATGGACACCGGGAGCAGATG
GGTGGCAATGCCATGGGCAGCTCAGCTGTGCCTCAGGATCTCCTGCACAG
CAGCAGCCACAAGGCTGGGCAGGGGCTGGGAGGTCACTGCTGGCTCAGCA
GCTGATAGGGCAGCAGCAGGAAGAGGGCAGGAAAGGGACTGGGAGGTCAC
TTCTTGCTGCAGCAGCTGAGAGGGCAGCCCCTGACTCCTGCCTGGCCTCT
GTGCTTTTGGCCTCCCAGCTGCCAGAGTCCCCAGCAGGCAGCAGAAGGCA
TGTGGTGGGCAAGGGACTTGTGTGACTCCCTGTCCCTAAGCACCTGGTGG
CCCCTGCAGGAAGAGCCTTGGAGCTGGGTTGTCACCTCCCTGCCACCTGA
GGGCCTGAGGGGACAGCAGCAGGGACAGGGCTTGGCTGTGGCTGCTGGAG
AAGCTGAGAGGCAGCAGCAGGGACCTGCCTTGGAAGGCCCTGNAGAGGTT
TCTTGTGGCTGCTCAGCTGCCAGGCCACAAGCAGGCTGAGGCCTTGGGCC
AGCATTGGGACATCAGGGATGGCTGAGAAGCTCCTAGGGCAGGAGGAGCC
ACATGGCCAGGAGGTGAGTGTGAGCTCACTGCAAACTCCAATCCCTTTGT
GTCATTGGCCAGCAGCAGGCCCAGGGCTGGTCTGGGGACTGTGCCATCCC
TTGTGCCTGCCAAGCTGAGAGGCAGCAGCAGGGAGGTGCCTTGGCTGTTG
CCTTGGAGCTGGNGGCTCTGNTCAGTGCCGAGGCNAGGNNAGGCCCCTGG
GCTGGAAGGGACCATTCCCTNNNGCCTGGGATGGAAGAGCCTGAGGCAGG
CGNCGCAGGAGACAGCTCTGGGCAGGAGCAGCTCCTCCGCACAGCACAGC
GGGGCTGCACNTCCCTGCATCTCAGGGAGATGAGGAAGGCAGAGAGAGCA
TTCAAGGCGTCCAGGACCGGGAGGGTGGCTGAGAGCANACGGGAAGAGNA
GTCGCTGCAGTCCCGACACAGCGAGGCTGTGGGGCAGGACGCTGCGGCCG
GAGCTCCTGGAGGCATCTCCGTCTCGGCTGCTGACGCTCAGCTGAAGGCT
CCTGGAGTGTGCACACAGAAGGAGGAGCAAAGCCCTTCAGAAGGTGCATC
TGAAAGGTTCAGACTGGAGGCCAGGACTAAGAAATGTCACTCAAAGCGTA
GAGCTGTGGTGCAAGAGGTGACCCAGAAGGAGTCTGGANAGCCCATGTCT
CCTTTGTGTGTCAAGGAACAGGCAGCAAGAGTGGAGAGGCCTGAGGGAAG
GTGTGGAAATGTCAGGGGGAGAGCTGGCTGGGGAAGCCAGATGGATGTCA
ACAGCCTGAAGGNAAAGAGCTGCAGGCATGGGACAGTGAAGCACAGCCTG
CAGGAGGGATGGCCAAGGGCTCTGGCAGGGCTGNAAGGCTCAAGAGGGAC
AAGGTCTTGATCCTGTNCCTTCTGGCAGCAGCTTCTGCCACCACGGCCGC
CGAGATGAGACCTGAGCTGGGGGATCTCAGGATCTGCCTTCCCAAGGCCT
GGGGCTCAGGGCTTGGCCTTTCTGNTTCAGAAACCAAGGCCAGGGTTTGC
TCNCCTGCACTTTGCCTTTGTCTGCCTGCAATCATGGCCTCCANCGAGCT
GCTCTAAGCAGCCCCTGGGGAGGCTTTGTCGGTAACGGCCCTCAGTGAGG
CCAATCAGTGCTTCAAGGNACTTCGGAGTTTTCTTCTGACTCTGACTTCT
TGAGCAGTTCCTTCAGAGTCTCCTCTCAGTACCTGAGGNTCATGCAATGA
GCCCCAAGTGCCCCATGGGGCTC
>cAur-Satellite#03#Satellite
GAGCCCTTGAGGGACCTCATCTGCTTACCCCTGCCCTGAGCAGGATCATT
GGACAAGAGGATGTGCAGGAGTCTCCTCCACAACTGCAGCAGGACAGAGC
CAGCAGCTTCTCCACTCAAAGCCTTGGTAGGAAATCTGCCAGATGGATCT
GGTGAAACTTTGATCTGCTCAGGCTCTGGCCACAAGGAGGCTGAGGGCTG
AGTGTGCAATCCTGTGCTCAGCTGTGTCTCAGGAACTCACCATTCAGTAG
GAAGCCAAGGACTGGGAAGGGGGAGGTGAGGCCACTTCTGCCTCCTGAGA
GGATTGGCCANCAGCAGGAACACAGCTGGGAAAGGGACTGTGAGGTCAGG
TGTGTCTGCAGGAGCTGCTAGGGCAGCCCTGGGCTCATGGCTGGCAGATG
GGCAGAGTGATCTGTCAGATGGCCTCTGCCAAAGGGCCTGGGCTGACTGC
AGGAAGGGGCTGATGGGTTGGTTGCTGTGTCTCTGCTGCCTGAGGACCTG
ATGGGACAGCAGCAGGCACAGGGCTTGGTGCTGTCTATGCAAGAAACTGC
AAGGCCAGCAGCCTTGGGAGCTCCTGCTGAGGTAGGCAAGAGCAGGAGAG
AGGAACACTGCCAGATGGTGCAGCCTGGCAGGTGCAGCCTGGCCATGAGG
AGCAAGAAACCTCTCTCAAAGGGTAGTGCTGTGGCCTGAGAAGTTCTGCA
GAAGGAGTCTGGGATCAGCCCTTCTCTTTGTGTCCCCGGGAGCAGAGGGT
GAGTGTGGGCAGGTGTCAGTGAAGGCATGGGAAGGCCAAGGTGGGGAAGT
GAGAGGAGTGTCTGCAGCCTGCAGGGCAGGAGAAGCAGCTGTGAGACAGT
GCAGGACAAAGCTGTGGGAGAGCTGGCNAAGGGCAATGGCAGTGGTGGGA
GTGATGAAGAGAAGCCAAGGCTGTGCCCTCTTGGCTATGGCAATTCTCTG
CCCCCGAGGCCTGTGAGGAGCTGTTGTCCTAAGGCACTGGGAGGGCCTCA
CTGCCTCTGTCCACAGCCCCAGGAAGGCTGGGGACTGTCAGGCCCTTGTC
CTCCACTCAGCATC
>cAur-Satellite#04#Satellite
CACGGCGGTGCTCGGTGAGGTTGAGCCCTTGCGGCTGAAGCTCTTGCCGC
AGTCAGCGCAGGTGAANGGCTTCTCACCGNTGTGGNTGCGGCGGTGGCGA
GTGAGNCGGGTGCCCGCGGTGAAGCTCTTGCCGCAGTCAGCGCAGGTGAA
NGGCTTCTCTCCGCTGTGCACGCGGCGGTGNTGGGTGAGGTCGGCGCTGC
GGNTGAAGCTCTTNCCGCAGTCGNCGCAGCTGTACGGCTTCTCACCGCTG
TGGGCTGAGNTGGTGCCGGATGNATGGAGTNCCTGGGTGAAGCTCTTGCC
GCACGCAGCACAGNGGAACGGCTNCTCNCCGGTGTGGNTGCGGCGGTGGA
TGGTGAGGCTGGAGCTGCGTTTGAANNTCTTGCCGCAGTCCCTGCAGGTG
AAGGACTTCTCANTGCTGTGCACGCTGCGGTGCTGGGTGAGGNAAGACCT
GCGAGTGAAGGTCTTGCCGCACTCGGCGCAGNCGNACGGCTTCTCNCCGG
TGTGGGTGCGGCGGTGCTGGAGATGCTCGGAGCTNCGGCTGAAGCTCTTG
CCGCAGTCGCCGCAGGCGAAGGGCCGNGGGCCAGTGTAGGCGCAGCGGTG
CTTCGCCTGCTCNGAGCCAGGTGGGGAGNTCTGCCCACACTCGGGGCACT
GNTTGGGTGGCACAGAGGGACCTGCTCTGGGCTTCNTCCTCCTCTGNAAA
TNCCTTTTCCTCCTCATCCTGGTCACCTTCATCCTCATGGTTATCCTCTT
CATACTCATCATCATCATAGTCATCATTCTCCTCNGCATCGCCATNNTCC
ATCCTGTCCTCTTTCTCCTCCTTCTCCTCTCCCTTCAGGCTGAACTTTGG
CTNCTCCAACTTGNTCTCTGGGTGCTGCTTCTCCTCCCAGCTTTTGTCTG
GGTCCTTCTGCGAGGCCATACTGTGGCAGGAAGGGGTTANAGCAGTGAGA
TTTGGAACATGGAAGCACCTGAGCCCAGGATCANAAAACCTCAGATCCTG
TCTGGGACATGACAGTCCCTGGCTCCCAACACCTCCCAACACCCAGCTGG
AGAAGGGAATGCAGAGGGGACCTCAAACCTTCAGGTTTTGTCACAGTGTA
GGCTCAGACCTCTACTACCTGTGCTGAGACCTCAGGTTCCTGTGATCAGT
GCCCTGAGGTACCCTGGGGCCTACAAGTGGTCTTGTCNCACTCTCCTCAA
GCCTGGTGGCATTGGCAGGGTGGTTCCCGCCCCAGGCCCTGTCCTTTGAT
CTCTCCTGGCTCAGGCAATGGAGGCAGCAGCACTGACCAACGAAGACCAA
ACCACCTTCAACCTTCTCCCACCACCCTCCAAATCCCAACTCCAAACACC
ACTTCCTGCCACACAACTGACCCCCACAAACCTGGGGAGTTTCCAAGCTC
CAACACCTGATATGCCTCAGAGCCCCTGGAGGGNTGAAATGTGGAGGCAG
GAGGAGGTGGAAGAAGCTGGAAAGTACCCTGGGACTCTGGGATTCTGGGG
GCTAGGGTCCTGCTGTTGCCCCACTCGGGAATCTTACCGGCTGGGCTGCT
CCAAGGGNCAGATCTGCAAACTCTGCTCTTCCACAGCACACAGGGGNAGG
GATGATGGANAGAGAGGGACACAACTCCTGNCANAGAGAAGCAAAGGGCT
CAGAGGANAGCACTGACCTGCAAGGGANGGCTCAGCNCTGCCCAGGACCA
GGCAGCACAGCTCNGCCTTGCTGGGGGCAGCTCCCAAGCCCAGCAGCACA
GCCACAGCACACAGCCAGGGCNGNTCAAGATGGGAGGCCTCAACAACTGC
ACACTCAGCTCCTTGCCCAGCACACAGCCCCCAGCACACAGCTGCAGGCC
AGCACCACAACACAGCTGCCTCCACACAGCCTCTCCCAGGCCTTGCCTAA
AGCTTCCTCCCACTGCCTGCCCAGGNCTCTGCTGCCCGCNGCTGCATTTG
ACAGCACATCTTNCTCTGGACCCACCTCTCCTCCCTGGCCCTGCCCCCAC
CACGCNCACTCTGTGCTCACCTCNGCCCTGCACACAACCCTCTGCTNCCC
ACTCCCCAGGAGAAGATCAGAGCAGCCCTCAGGACACACACAAAGGGAGC
TTCGTGATCTCTGGAGATGNAGCAAAGGGGGAGGGACNTGGGCAGCTTCT
TGCTAAACCTCTTCAGCCCTCACTGGGATGCTGCAGGAGTCTCTGGCTCC
TGCCCAAACCTCACACCTCCAGCACCCTTCACACACCTGCAGCCCNAANA
GACTCACTGGAAAGGGTTTTGCCTCCTTCTCTCCCTGACCATTTCTCTCA
GCTTNCTCTTTGCAGCTCTCCTGGAGCTGCCACTCCACANCNCCAAGAGA
AAAGGAGGTTTGATGGGAGGGCACAGTGCCCAGGGGCTGAGCTCTGTGCT
CTTCCCCCAACTGGGATTCCGTGGCAGATTAGCCGGGGACTCACGNCTCG
CTCCTCTTTCTGCTACCTTCCCAGATGCTGCGGCTATCATTTCCTGCACA
CACATTTGCCACCTGGGCCCTGGATCCTCTCCCCNTTTTNGGGGGACAAG
GCCTAATTCCTGCCTGGNCACTCCCAGGCCCTTCCCTCAGTCCCAGCCCA
TCCATGGCCCTGCTGCCTTGGCTNTNCCNTGGCCCTGGGTCCCCCACCTC
CACTGCCACTGCAGCTGGAAGGGGGGAGTGGGAAATGCTGTGGCTCGGGA
AGCCTCTAAGGAACTGGGCTGGAAGCAGCAGCACAAGAATGGAAGGGGCC
TGAGACTAAAGGCTGGGATCAGCTGGAGGGCTGAAAGAACAGCACCAAGC
CAAGGGGGGGTTACAGATGAGGGCTGGGGAGGGACCCTGCAGACACCTCA
GGCAGCAACTGAGGAGAGGAAGGGGGACAGAGAGGGAGTGAGACCTCAGG
TGACTCCTGCCATGGGGGATGGCTGGGCTGTGTGGCTAGGAGCCCTGAGT
GCCTGCTTGGGCTGTGCTGCATGTCAGGAGGGGTCAGGGGACTGTCCTGA
GCCAGGCAGGGTTTGGGGCTTTGAGCTTCTGGGGTCAGCTGCTGCCAGCA
CCGTTGTAGGTAGGAGCCAGGCAGAGCCACACAGCTGCTGAACTAAGCCC
TCCCACCCCCTGCAGCCTTCACCCTCCATCTCTCCATCCATTGCTCCAGC
TCCACTCACTTGCTGCCCTCTCAGAGTCCCCAGGGCCCCACGCCCCAGGG
CTGATCTACACANCCAGCAGGGCCCAGCANANGCCCCTGGATGAGAGCAT
GGAGGAGNATCCCTGTGGTGGGTTTAAGGCACTGGGATGTCTTTAAGACC
ANAGAGTAGAGGCCTCCAGAGGGCCAGNNAGGTCCAGAGGTGGACACGGA
AAGTGTAATCTTCTTATTTCATTCCCATAAGCCCTGCACCACTCTCTACA
AANGAACAGCACAGGCTCTCCCCTCCTTTCCCTCCCTCTCTGCTCCCGGG
ATGCACACTTCTGGGGTCTCTCTTGCGGGGGAGTTTGNGGCCTTGGCATG
CTGCCAGCTGNGGCCTGGAGTGGCCTGGCTCANCCGGGAGCTGGCAAGCA
GAATTTGTAGCTGCGTCACTCGGGTATGGGGGAGGAGGGGCAGAGAGGCG
TGGNGGAGGGGGAGGCATTCGAGGCCTGGGTGTTTGGCCCGGTTTGGNGG
AAGGCTGTGGGAAGCTTTGGCCTAGGGAGGTTGTTTGGAGAGCCCGTGGC
CGAGGCGGACTATGGATTGTTGTGNATTTNTATGCTTTGCACTGTAGTAT
GNAGCTATGAATAGTACTTCCATTTAAACTTCCCAATTCTNTCCAATCCT
GTGGGACAGCTTTCTTCAACTCCTTTGAGAAGGNTTAAAGAGAGCCTGTC
TCGCTCCTNAAACCTAAG
>cAur-Satellite#05#Satellite
CTTGGAGAGTGCCCAGAGATCTCCCAAGATGGGAGCACATGATAGAGGCT
GAAGGCCGTGGGCTCAGTGGTGTGGAGANTGAGNACAGNAGAGGAGCAGC
CTGAGAGTGCTTGGGGAGTGGTTTGAGATTNCTTCATAGTGACGAACTGC
AAGAGAAAGAAACAAAGCCACGAAGTGCAGCTGGGGAGGTCCAGACTGGA
CATGAGGAGAAAGAAATGTCACTGCCAGGGCAGTGCTGTGGTGCAAGACG
TCCCCCAGCAGCAGCCTGGAGCACTCCAAGGCTTGGTGTTTCAAGGAACA
NCCAGGGAGGATGGAGAGAGAGCAGCAAAGGAAGGTGGCAGCAAGGTGGG
GCAGCTGGCTGGGTGACTACAGCCTGCAGGGAAAGAGGCTCAGCTGATGC
AGCAGCAGAGGACAGCCTGAGGGGCAGATGACAGAGGGCTGTGGGAGAGC
TGAAAGGCTCCTGGCAGAGCCAAGCTCTTCCTGCCTTGGGTTCTGGCTGT
GGTCTGTGCCACTGATGCCTCTGAGGAGACAACTCCTCCTTCCAGCCCTG
GGGCCTCATTGCCTCCTTGTCCNTCCTCAGGAGCCTGGGAGGGGTTGTGC
CAT
>cAur-LTR_01#LTR/ERV
TGTGGTGGGTTGAAATTNTCCCCCCCAACATTAAATTTGCCAGACCAGCTCAGTTGGAAGCAAATGAAAGCTGTATTTACAAGCAAAACTACAATCTACAATGGAATGCAATGAATATGTACAAAATATACAGTATTTACAATATTTACAGGTATTTACAATTAATAAACAGCACAAGAACCCCCCTGGTCAAAGACCAGGGGAAGCTACTAGCTTCTCCCTCCCTGCCTCCCCYNNNCCCCCTGTACAAAAGGGACAAGAGAMAGGAGCAGAGAARTTNAGACTTAACCAAAACAATGCAGCCAAGGTCAAGCAGAAGCAAGTTAGTATCTCNCCAGASCAAAGAAGYRAGAAGAGAGAGAAATTGTTTTGGYACAACHAGTYTTATGGTAGATWWCTYTCCAATGGGATTGTTTAGAAYTATCTTTATTTTCCTTTTTACACCCAATAGTGATTTATTTACATTTTACTACTTTCTGYTCAAGATCTGTGAAAAAWTTTTAAAGGCATAGCCTAAAACTACCACA
>cAur-LTR_02#LTR/ERV
TGTGGTGGTTTGAGCCTTAACTGGAAGTTAAGAGCTCAGGTGGGGGGCAAGGCTGAGAATCTCTCCCCCACTCCCCCCCTCCTCCCTCCCAACAGAGAGGGGAGAAAAGGAAAGAGCAAATCCACCAAACAATAATTTGGAGTCGGCTTGGAAGTAGAGAGGCAAAGAGTTGTCTTTAAGCAANTATATATATATATAACAATAACAGGAAAAAGGTTCACAAGGGCAAGGAACAAGGATGGATGGGAGGGGGACAAAAACAAGAGAATAATACAAAACCAGCCTTTCTCTGAGGAAGCGTGGAGGCAGCAGGTCCGACCACGTGGCAGAGGAGCAGGAGGGCAGCTGCAGTAGCTCTCGTCCAGCAGAGGCAGAAGCCAGAAAAGCNGGGGCCAACAGCTACGAKGTCCTGCTTTTTATACCCTAGCTGGGCAGGGAGGGGGGAGTGGAACAGACTCAGCTTCCCAGGTGAAAAATGCCCTGCAGGGAGTGAAAAGTACCTGCAAGCCCTCCACCCTGCTTTGTTCTTTTGTTCTCAGAAAAGGGTGTTAACCCACCACA
>cAur-LTR_03#LTR/ERV
TGTAGTGGGTTGAGGCAGCCCCCTCCCCACCACGGGCAAAAATAACAACTCAGACAAACGGATTGCAAAAGTGATGGAAAGTTTAAATGAAAAAGCAGTGAATGTTTACAGAGAGAGCCAGAAGCAGTGACAAAAGAAAATCCCAAARCATACCCAGAAAGATCCCATCCCCACCTGGGGGTACATCCAAGACCCCCAGGGCTCCTTCTTCCCCCCTCCCCACTGCTAGGCTAGTCTCAGCTGGCCAGATCTGAGACTGCCCATCCCCCCGTGGCCTTGGGCCTAGCCAGGCCCATGGCCGGGAGACAACATCTCCCCCAGTTACCGGGCGATGGCGAGGAAGAAAGAGGAGGTGCCAGACCTCSCACTGGATCTTATAGTGGTGGTGCAGAGAATTATGGTAGAAATACCTAATTTCCTGTGTCCACCCACTGGGCTGGACCTCTGGACACAGGAAGCACCTCATGTAGCAGAGGGCACCCAGCCCAAACTGCAACATGCCACCCCTTATTTCATACCATAATCTCTGCACCCCAAACATATCATCAAATCAGAAATCTTCTGATGACATGTCCAGCGAAGTCTGTATCTTCATCTGGGCGTCCACCCAAACAGTCTCTCATTCAGGCTCAAGCATCAGTCCATTCCAGTTCTTCTTCTCTCATCTAATGGAACCTCCCAGCGATGCAGAGTTCACTCTTCTGCGGTGCAAGTTCTTCATGGATCCGTTGGACATGCTGGTCACCTGGAAAAGCCTCACAACTCCTCACCCCTTTATTTCCATCTCTATTTACTCAGCGGCATATTTCCACCCCTGGGGCAAGCCAGTCAGAACAATCAGGCTCTAACTGCTTCTCCACCCCTCCAGGAAAATAGCACGCTGAGCCTTCCACAACCCTGCACGGACCTATCCCAAGCCCAGTGCTGACCGCTTCCAGCCGCGGCCCGAGGCTCYACAGATGCATGTCACAGTACACCGCCCTCCCGCTGGGCGTTCGCGTACCGAGGCGTGACAGCATCAGACTACACAACCCTCCCCCMAAAAGAGGGAGGGGCTGCACCACAACCTACTGAGAAGAAGGGAGGTAGTGCCAGGTGCTTGGCGCCATTTTCGGAACTCGTCCGAAAGATCGGGGAAGAGACTAGGGCCGGCCCTGCTACAGCCCGAGCGCACGGCCGGGGCCGCCGCCGCCACAGCCCGAGTGGACGGCCGGAGGCCGCCGNCGCCACTCAGAGCGCACGGCCGAGCCCACCGCCGCCGCAGCCCGAGYATACAGCAGGGCTCCGGCCACCTCTATCGCCGCGGTACAGAATCAAAATCACCTCCACCCCTCGGGCATTCAAACAGCTCCTCCAGCGAAAGCCATAAACGCGTTCTCAGAGCCCTTGAGAACGGCTTTCCAACTGGGGTCCCCGTTCGCCCTCCTGAGTTTCGGGAGCTGGGCTCGCCCGCTCGCCACGGCTGGCTCTATCCCCGCAGCGAGAACGGACCTGACTTTGATCTGCTCGCCGCTGCCCCTCCCCCGCTTCACTCCCCGCCGCTTCTGTCGCTCCGCAGAGAATAAAGGTGGAGGAAGGGCAGGTCCCGCGTTCTTAAGCGGTACCCCAATTCCGATGGTCAAGAACCACCCCTGCATAAAACAGCAGGAGGGGGCTCCGTGCCACCGGCCACGCACCAGGTGTCCCCCTGCAATCCACAAGAACTCACACAATCGCCCCAGCAACAAAACTTGAGCCCCAACTTCTAAAACCCAAACCGACGCCCAGAACTAGATTTAAACTCTCCGTCTTTTGCAATCCGATCTGCAGAGTGACCACAAYAACAAACTCCTACTCCTGGCTGGCTCGCCAGGAATGCAAAGGGGTTGAGGGCAGACCCCCTCCCCACCGTAACCATCCTCTGCTACCAATAATGTAGTGGGTTGAGGCAGCCCCCTCCCCACCACGGGCAAAAATAACAACTCAGACAAACGGATTGCAAAAGTGATGGAAAGTTTAAATGAAAAAGCAGTGAATGTTTACAGAGAGAGCCAGAAGCAGTGACAAAAGAAAATCCCAAAACATACCCAGAAAGATCCCATCCCCACCTGGGGGTACATCCAAGACCCCCAGGGCTCCTTCTTCCCCCCTCCCCACTGCTAGGCTAGTCTCAGCTGGCCAGATCTGAGACTGCCCATCCCCCCGTGGCCTTGGGCCTAGCCAGGCCCATGGCCGGGAGACAACATCTCCCCCAGTTACCGGGCGATGGCGAGGAAGAAAGAGGAGGTGCCAGACCTCSCACTGGATCTTATAGTGGTGGTGCAGAGAATTATGGTAGAAATACCTAGTTTCCTGTGTCCACCCACTGGGCTGGACCTCTGGACACAGGAAGCACCTCATGTAGCAGAGGGCACCCAGCCCAAACTGCAACA
>cAur-LTR_04#LTR/ERV
TGTGGTGGGGTGAGAAAGTTCCCCNNCACACACACACAAAGAAACCACAGCTAGCTCAGTCGGAAAAGCAGATGAAAGCTATATTTACAGGCATAAATGGAATGCAATGAATATGTACACAAATATACAATATTTACAATATATACAGAAATACACAGCAATGAACGTAATGCAGAAAAGCCTTTTCCCTCCAGCCGGCCAGGGGGGTTCCCTGAACCCCCCTCTCTCCCTCCCTACCTCCCCTTTTTCCCAAAAAGGGTTAGAGAGAGAGAGAAAGGCAATTAAGGAGAAAAATTCTGTTAGCTCAAAGCGTATGCAAGAATTAGTTTTCTTATCTGGTTAGCTTTGTTAATTCAAGGTCGCTCCTGTCCGGCAAAGCTGTTGCTTCAGAGAGAGAAAAAGTACAGAACTGAACACAGCCTGAACCCAGACCAGACTGGCAGAACCCAAACTCAAAGCTGCATTCTACCAATCCACCAATGAAATTAGTTTAGACTATCTTGTTTTTGTTTAAATATCAAAAACATTCAGCCAGAGTGTTCAGCAACTGTCTCTTTCTTAAAGGCACAGCCTAAACCGGTCACA
>cAur-LTR_05#LTR/ERV
TGTAGTGGATGATGCTTATGGCCAGGATCGTGCCCTAAATATTTCTAGGACGTACTCTTCTGTGCGTTAACCCTCCTTTGTTCCCCCCCTCCTTTCTGAAGGCAGCAGGGGGGATCCTGGCGCCACTGAGTCCAGGTAAACTGCCTGCCTGGGCGTGGTCTCACCCCTGTGGTAGGCAAGGGCCAGGCTATATGTTTGTTTCCCTGTTCATGGCATAAGCTTACACCATATTTGGTAGCTGCCAGTTCATTGGTTAACCTTGGTGTTAGCAACAGATGCTCATTGGACCAGTATTCACTGGGGCAAATGATAAATAGGGGTTGTTTGGTGATGAACCCCCCCACACATTTGTGTTCGAGCCTGTATCTGTGTGCGCACCAGTGCTGTTGTGGTTCACCTTACTCGGGACTAAAGCCAGTGCTCCAAGAGGCTTCGTGGTACTTTGCCACCACCACCCAACTGCGTGCAGTGCCGTGGACAGTACCCCGTGGGATCAACTGCTGCATGATCCATCGCCACAGGAGARAACCTGGTAACCCGTGTGAACCAGCGCTGCTGAACTGCCACAGTGCCCCCCCCCTCGAGCGGGGAATCTCCGTATCCCGGGAGCAGCAGCCACGTGGCGCAGCCACGCGGTCGGCGCCATTTCCTGTGTCCTCATTACGGCATATCCGTGCCACGTTCTGCGGACTATAAACCTTATCAAGGGAAGACTTCACKAAGTTCTCAGCTTGTGAGTAAGCCAAGCCTTTCTTCATARAGTTTCAGTTGGGGTAGCGTGCAAATCGCTCCGGGTGGAGGATCGCCGGTCACTGACCAACCCCCTCCCCCGCCGCTTTCCAAATCAGTTTTGATTCTAAGTTCTGTGAATCATTTAGTTTAAGTGTCTATACCTAAACATTCTGTAAAGATAGTTTCACTAACCGAATATCGATACCTGTGAAGGGGAACTGTATATACCCCGTTGCAGAGTTTGTATATATATAAAAATAAACCTAACATATATTTTTCATTGATATCTCTGCCGCTCATTTCTGAGGGCATATTCATAACA
>cAur-LTR_06#LTR/ERV
TGTGGTGGGTTGAAATTTCCCCCCCAACATTAAATTTGCCAGACCAGCTCAGTTGGAAGCAAATGAAAGCTGTATTTACAAGCAAAACTACAATCTACAATGGAATGCAATGAATATGTACAAAATATACAGKATTTACAATATTTACAGGTATTTACAATTAATAAACAGCACAAGAACCCCCCTGGTCAAAGACCAGGGGAAGCTACTAGCTTCTCCTTCCCTGCCTMCCCHYYMNCCCCCTGTACAAAAGGGASAAGAGAAGRAGCAGAGAAGTTAATNNNNGNNNNAACCAAAACAATGCAGCCAAGGTCAAGCAGAAGCAAGTTAGTATCTCTCCAGAGCAAAGAAGCAAGAAGAGNGAGAAATTGTTTTGGKACAACYARTYTTATGGTAKWTAWCTCTCCAATGGGATTGTTTAGAATTATCTTTATTTTCCTTTTTACACCCAATAGTGATTTATTTACATTTTACTACNTTTCTGTTCAAGATCTGTGAAAAANTTTTAAAGGCATAGCCTAAAACTACCACA
>cAur-LTR_07#LTR/ERV
TGTCGCAGTAGGGTGCCGGGCAGCACCCACAGCGACGAGGGTGGAATTCAAGCAGGGGGGTAGGGAGCGCCCAGGTCAAGAGCTCCTACCTGCAGCAGCAAGCCCATGAGACTGACGACTGCCTTCATGGCAGCTCACATTCGTTGCTCTCCCCTTGGAGTGGCTGCAGGGGAGTGGTTAATCGACCTCCTCCTCTTACTGGCTGGTGATACTTATTAGGGTAGCACAGCTGACCCTTATCTCATCTATTGGAGTTACTTGTTAAGCCATCAACAGGTGGCTCCCATTTCATCTCTCCTTGCAGTTTCTCATCTCCAATCATTCAGTCCAGGGGACACAGTCCCCCACA
>cAur-LTR_08#LTR/ERV
TGTTGAAGAACGGCTTAAAGAGAGAGGGCATGGGCCCCTAGAAGCAGTGCACAACCCAGGCTTTGACGGTGATCAAGTAAATAAGTATGTAAATAAGTTGGTAAGTTTGGGCTGTTAGCATAACTATAGGCTGAGCTGGATGTCAGCCAGCAAGCCTTCAAGGACGGTCTGTCCTTGAGAACTTGGTAAACAAACTGCACTGAAAGACAACAGGTGGGGGCCACTGTGAAAGACCACAGGTGGGAGGAGTRTGTAATCAGGACCCTTTAKGTTAGAACCAATAAGATTGTGCCGGGCAGGCCCATGTTGGTTATAAAGTCTGATGCAAACCAAAATAAAGTGGCACTTGTTTTATCACTCATATTGAGTTGGTCTCATGTCCGAGCCGCGGGAAAAATTCCCTCCGACAACA
>cAur-LTR_09#LTR/ERV
TGTGRCSGGTTGAGGCTGTGCCTTTAAGAAAGAGACAGTTGCTGAACACTCTGGCTGAATGTTTTTGATATTTAAACAAAAACAAGATAGTCTAAACTAATTTCATTGGTAGATTGTAGAATGCAATTTTAAGTTTGGGTTCTGTTAGTTCAGTCTGGTCTGGGTTCAGGCTGGGTTCAGTCTGTGCTTCTCTGTCCTGTGGGCTGGACAGCTTCTCTCTTTCTGAAGCAGGAGTGACCTTGGNTRASAAAGCTAACCAGATAAGAAAACTAATTTTTGCATRWRMKTTTRAGCTAACAGAATTTTTCTTCCTTAATTGCCTTTCTCTCTCTCTCTAACCCTTTTTGGGAAAAAGGGGAGGTGGGGAGGGAGAGANGGGGGGTTCAGGGAACCCCCCTGGCCAGCTGGAGGGAAAAGGCTTTTCTGCATTGCGTTCATTGCTGTSTATTWCTGTATATATTGTAAATATTGTATATTTGTGTAMATATTCATTGCATTCCATTWGTGCSTGTAAATANAGCTTTCATCTGCTTTTCCAACTGAGCTAGCTGTGGTTTCTTTCTTTGTGTGTGGGGAGGGAACTTTCTCACCCCACCACA
>cAur-LTR_10#LTR/ERV
TGTCGTGGTTTGGGAGAGCAATCCTCCCACCACGGGCAGAAATAACGACTCAGACAAACAGATTGCAAAAGTGATGGAAAGTTTAAATAGAAAAACAAAAAGGAACAATGAAAGTTTTACAGAGAACCACAAGCACCGTGACAAAGAGAGAGAGATCCCATCACCACCTGGGGGTACACCCAACCCCCCCAGGGCTCTTTCTCCCCCCTCCCAACCCAGCCTTGGGCCTGGGCAGGCCCAAGGGAGGCAGCTCAAGCCATTTTACCTAGGCAGCAGCAGGGGACGAAAGAGGAAGTGCAGACCCCGCGTGGATGTTTTATAGGGGAGCAGGGCATTATGGGAAATGGAATACCTGGTTTCCTGTGACCACCCCCCTGGGCTGGGCCCACCCCTTGGGACCTCCCAGGTGTGGTCTGTGCAGTGGCATCCGGGCCAGCACCCAGCCTAAACCACCACA
>cAur-LTR_11#LTR/ERV
TGTGGTGGGTTAACACCCTTTTCTGGGAACAAAAGAACAAAGCAGGGTGGAGGGCTTGCAGGTACTTTTCACTCCCTGCAGGGCATTTTTCNCCTGGGAAGCTGAGTCTGTTCCACTCCCCCCTTCCTGCCCAGCTAGGGTATAAAAAGCAGGACCTCATAGCTGTTGGCCCGGGCTTTTCTGGCTTCTGCCTCTGCTGGAYGAGAGCTACTGCAGCTMCCCTCCTGCTCCTCTGCCACGTGGTSGGACCTGCTGCCTCCACGCTTCCTCAGAGAAAGGCTGGTTTTGTATTATTCTCTTGTTTTTGTCCCCCTCCCATCCATCCTTGTTCCTTGCCCTTGTGAACCTTTTTCCTGTTATTGTTATATATATATTGCTTAAAGACAACTCTTTGCCTCTCTACTTCCAAGCCGACTCCAAATTATTGTTTGGTGGATTTGCTCTTTCCTTTTCTCCCCTCTCTGTTGGGAGGGAAGNGGGGGGGAGTGGGGGAGAGATTCTCAGCCTTGCCCCCCACCTGAGCTCTTAACTTCCAGTTAAGGCTCAAACCACCACA
>cAur-LTR_12#LTR/ERV
TGTGGTGAAGGCACATTCTGCCCAGATACTAGATCTGGTCCCAGCATGTGGACAAGTTTCCCCTCCTTCAGGAGGAAGACAAAAGCCAAGGCATTAGCCAGGCCAGCACGCACTCAGCGCATGCAGTGCTTGTGCAATCACCAAGTATGGGCATAATTCCAGCTTCACGCTTTCTATAGGCTGAAGCCAGTTGTCTATGAGAGTGCCCATTGGTCAAACCCAGCCTCGAGGAATCTATAAGTATTACCCCTGTTGGTAAACAAGTTGCCCCCTCTTTCACTTTGTCTCTGTACTCGCTCGAGAGAGSAGCTCTCGAGCCACAGCCTCTGCCATTGAGCTTATTGTTRTTAGCTTCTATCATACATGCACGCATACTGAAGCCTCTGCATCGTGAGAAGCACTTTGATCGTGAGGATCAYCCCAGAGGGAGGACCTTCGCTGAGCCCGAGAAGCCAGCGTCGCCACAGCCAGTCGTACCGACCGGGAAAGCCCACCGTGCTACCGGAGGACTGGACCAGCCCCCGAGGGTAAGATCTGCCCAGCTGTCGGGGAGAAGGGACTTACTAGAGACTAAGTCCGCATATACCTAGCCCCGCCATAGCGGGAGAAGAGCCGCCACGTGTGCCGCTCCAAGCCCTGTAACCGCAGGGAAGACTAAAGCATTGGTCGTGCCTATACTGCACCAAACCCGGGACTGCCCCGATCGTCCCGCTGTGCCTTTAAGCCCAGTAACGGAGAAGCCGCAGCTCAGCGCAGCCGCATTCTCTCTCCGAGGCTGTTTACCTCAGCCCCGAGATCCGTCGCCACGAGGCCGACCCCATAGCTATTGTTGTCCGACCGGGAACCTCTGAACCCGCCTACCGGCAACCGTCGCCCCGCCCTGCCGTGCGAGCCGACTCCCAGGGCCGACCCYACGGGCCGAACCCGACCAGGACCTATCCCTATTGTCTGGAGGGAACCGACCGAGTCCTGAAGGGAACCTGCTTCCRAGCCAAGCCCAGGTTCCAGCATTCCTTCTCCACTGCTGCGGAGAGAGGAGATAATACCCAACACCACCGTTTCAAGTCTACTAGGAATCAGTCCAGCGGCAGTAGTCAGCCGGACCCCCACCTTGCTACAAACAACAGCTACAGAGTATCTCCCACGTGCTTTCCACCCACTAGCACTCAGTTCAAAGYATCCGCGTGTAGCAGTCATCGCTGACGCACAGAAAGATTGCAATATTGTTGTACATAGCCAGAAGCCGCCCGCGTTCCGCCGAGTCGCCATCTAGTGGCCAAGCGGCGGAACTGCACTCTTCATTATATAAACATACAAATAGTCTGTAGATAGTTTAATTAAGTTCTAATCATAACACTAAGCCATTTATGGAATGTATTTCACGAACGTGCACTAGAACATGTATATAAGTTGTTGATTCATCGGTTATTAATAATTTGATAATTAATAAAAWTAATATTTTCATAATTCATATTTCATATTCANTAAATTTAATAACCTCTTCACAACA
>cAur-LTR_incomplete_01#LTR/ERV
TGTGGTGGGGTGAGAAAGTTCCCTCCCCACACACAAGGAAAGAAACCACAGCTAGCTCAGTCGGAAAAGCAGATGAAAGCTATATTTACAGGCATAAATGGAATGCAATGAATATGTACACAAATATACAATATTTACAATATATACAGAAAAAYACAGCAATGAACACAATGCAGAAAAGCCTTTTCCCTCCAGCCGGCCAGGGGGGTTCCCTGAACCCCCCTCTCTCCCTCCCTACCTCCCCTTTTTCCCAAAAAGGGTTAGAGAGAGAGAGAAAGGCAATTAAGGAAGAAAAATTCTGTTAGCTCAAAAGCACATGCAAGAATTAGTTTTCTTATCTGGTTAGCTGTTAACTCAAGGCCGTTCCTGCTTCAGAAAGAGAGAAGCCGTCCAGCCCACAGGACAGAGAAGCACAGACTGCACCCAGCCTGAACCCAGACCAG
>cAur-LTR_incomplete_02#LTR/ERV
TGTAAAGGTCTAAWGTCTCGATCCGGAGAGGGAAAGAGATTCAGGTTTTTAATGAATATTCCCGTGTTGTGAAATTAGAGGCACAAACGAGGCCAAAATATCAACAGCTAGACTATTTATTACATAAATACAGTGGATGGACATAAATAAAGTGGATGGATCAGAAGGGGANAGAGAGANAATAGAGAGAGAAGAGAGAAAAGGAAAGGAATTATATTACCACACCCCTCACCNCCCNAGACAGTTTGAGTCTGTGGAGGAAAGSTRRMCGGTGCTGCAGGAGATGTCGGGTCTGTAGAGGAAGGGTGCTGAGGCTTTGGCTGTAGAAGGGATGTGGTCCTCTGGGCAGCTTCTTCAGCTCCATGAGTTGCAGCAGGCGGAACTTAGGGCACGGAGAGAGGGTTTACAGAGTCCAAGATCCGTTGTGTTGGCCCCGTGATGTTTCCAGCGTGTGGTGCTGCATTTTGCTTCTCCAGTTTTCTTCTCCGTNNTNNTTTTCTTCTYCCAAAGCCAGTAGTTGCTCCAGTCTTTTATACAGTTTTTTAGTCCTCAGGCAAGTGTCCAGGCATTGTTCCCCAGGATATCGTTCTGGGAAATCATCCTTAGGTAAGTGTCCAGGTATCGTTCCCCAGGAAATCTTTCTGAGTACTCAGGTGAGTTTGGGCAGCCGTCTGGATGGARGGGGGGGAGGCCTCCACCTCCTCCTGCTCCATCTACCTACCCACACACNCATTACACATCAGGGAACNGNNGGNGNTTCCATTGTCCTTTCCTGGGGTATCTGATGGCTGGAAATGATCTTGTCCTGAAGGCATGATGGCTGGGCCCTTGGACCATTGTTGTAGGCCAGCTGCAGTNCNGTGAGCAATGTTATCTTTGCACCTTCCAAGAGTCCTTCCAGTGGCTCTGCCCAACGCACATCAGCTATTGTCTGGGCAAGCAGCAAGTGATTTTATCTTTGTTGAGTCACACCAGGAGAGACAAGCTTTAGACTCTCACACCACCCCGTCANTCAAAGATAAA
>cAur-LTR_incomplete_03#LTR/ERV
TGCCGCAAGAAGGGGGCTAACTCACAATCGATACGATTTGTTAGGTCCAAACTTTATTAAACATCAAACACCTTATATATGCTTARGCTATSATTACATATTCCAGTCATCATCTTATTGGCTATTGCTAAAWGTCAACYCTGCCTCCCTTGCGGTTTCTCCTCCAGTTGCAGCTATCCACAAGTTCTKTGYTTTGCAGACTTAGGGACTTTCCCAGCTCTTCAAGGCNGTAAATATCTTCAGGGYCGTTACAGCTTGTTGATCTTTCTCAGGCGTCTCAAGGTTTCTTCAGATANGCCTAACTCCNCAAGATTTACCGCCAACTCATCCATTTTCAKGGCTGCACCAAYAATT
>cAur-unknown_01#UNK/UNK
ACATCCTGCATAGGARATGTCCCTGGWGTCCSTCAGGGAATTGGCCATGGANTTKGGSACAGTGGTGGAGATGGCACCCAGGTCAAGGANGGCGAGGTTGAGGAGGAAGAAGTACATGGGGGTGTGGAGGTGGTGGTCCCAGGCTATGGTGGTGATGATGAGGCCATTGCCCAGCAGGGCAGCCAGGTAGATGGCCAGGAAGAGGCAGAAGTGCAGCAGCTGCAGCTGCCTTGTGCCTGKGAATGGCAGGAGGAGGAAGTGGCTGCTGGAGCTGCTGTTGGCCATCTGCTGCCTCTGGCCATGGAGRCCTGYGCWAGGAGGGAAAGGCAGTGACAAGTYAGGGCACACTTCTCTMAGCCTCATTGTAMCCCCTSTYCCTGAGCTGCAYSAKGAATGGATYAGCTCASTYCNCATCACTRCCAAMCCATGGC
>cAur-unknown_02#UNK/UNK
CTGTAAAGGTCTAATGTCTCGATCCGGAGAGGGAAAGAGATTCAGGTTTTTAATGAATATTCCCGTGTTGTGAAATTAGAGGCACAAACGAGGCCAAAATATCAACAGCTAGACTATTTATTACATAAATACAGTGGATGGACATAAATAAAGTGGATGGATCAGAAGGGGAGAGAGAGAAAATAGAGAGAGAAGAGAGAAAAGGAAAGGAATTATATTACCACACCCCTCACCCCCCAAGACAGTTTGAGTCTGTGGAGGAAAGGTAAACGGTGCTGCAGGAGATGTTGGGTCTGTAGAGGAAGGGTGCTGAGGCTTTGGCTGTAGAAGGGATGTGGTCCTCTGGGCAGCTTCTTCAGCTCCATGAGTTGCAGCAGCCGGAACTTAGGGCACGGAGAGAGGGTTTACAGAGTCCAGGATCCGTTGTGTTGGCCCCGTGATGTTTCCAGCGTGTGGTGCTGCATTTTGCTTCTCCAGTTTTCTTCTCCTGTTTTCTTCTCCTGTTTTCTTCTCCWAAAAGCCAGTAGTTGCTCCAGTCTTTTATACAGTTTTTTAGTCCTCAGGCAAGTGTCCAGGCRTTGTTCCCCAGGATATCGTTCTGGGAAATCATCCTTAGGTAAGTGTCCAGGTATCGTTCCCCAGGAAATCTTTCTGTGTACTCAGGTGAGTTTGGGCAGCCGTCTGGATGGAGGGGGGGGAGGCCTCCACCTCCTCCTGCTCCATCTACCTACCCACACACCCTTTACACATCAGGGAATCCATTGTCCTTTCCTGGGGTATCTGATGGCTGGAAATGATCTTGTCCTGAAGGCGTGATGGCTGGGCCCTTGGACCATTGTTGTAGGCCAGCTGCAGTCCCGTGAGCAATGTTATCTTTGCACCTTCCAAGAGTCCTTCCAGTGGCTCTGCCCAACGCACATCAGCTATTGTCTGGGCAAGCAGCAAGTGATTTTATCTTTGTTGAGTCACACCAGGAGAGACAAGCTTTAGACTCTCACA
>cAur-unknown_03#UNK/UNK
TATGAACAGCHAATGAAATTGTNTAGAANNGGTGRATTGTGACCGGTTGATGCTATGCCTTTAAGAAAGAGACAGTTGCTGAACACTCTGGCTGAATGTTTTTGATATTTGAACAAAAACAAGATAGTCTAAACTAATTTCATTGGTGCTTGTAGGGTGCAGTTTGGAGTTTGGGTTCTGTTGGTTCAGTCTGTGTCTGGTCTGGGTTCAGGCTGGGTGCAGTCTGTGCTTTCTCTCTTTCTGAAGCAGGAACGGCCTTGAGTTAACAGCTAACCAGATAAGAACACTAATTCTTGCATGTGCTTTTTAGCTAACAGAATTTTTCTTCCTTAATTGCCTTTCTCTCTCTCTCTAACCCTTTTTGGGAAAAAGGGGAGGTGGGGAGGGAGAGAGGGGGGTTCAGGGAACCCCCCTGGCCGGCTGGAGGGAAAAGGTTTTTCTGCATTGTGTTCATTGTTGTATTTTCCTGTATATATTGTAAATATTGTATATTTGTGTATATATTCATTGCATTCCATTTATGCTTGTAAATATAGCTTTCATCTGCTTTTCCGACTGAGCTAGCTGTGGTTTCTTTCCCTGTGTGTGGGGAGGGAACTTTCTCACCCCACCACATA
>cAur-unknown_04#UNK/UNK
GTGGGTTGAGGCAGMCCCCCTCCCCACCACGGGCAGAAATAACGACTCTGACAAACGGATTGCAAAAGTGATGGAAAGTTTAAATAGAAAASAGTGAATGTGTACAGAGAACCAGAAGCAGTGACAAAAGAAACCCCAAAGCAGACCCAGAAACATCCCATCCCCACCTGAGGGTGCACCCAAGACCCCCAGGGCTCCTTCTTCCCCCCCCCCACTGCTAGGCTAGTCTCRGCTGGCCAGGCCTGAGACCGCCCATCCCCCTGGCCTTGGGCCTAGCCAGGCCCAAGGCCGGGAGATGTCTCCCCCAGTTACCAGGTGCCGGCGAGGGGAAGAAAGAGGAAGTGCCAGACCCCGCGCTGGATTTTATAGCGGTGCAGGGGATTATGGTAGGAGATACCTGGTTTCCTGTGTCCACCCACTGGGCTGGACTTCTGGACACAGGAAGTACACCACGTAGCAGAGGGCACCCAGCCCAAACCACCACA
>cAur-unknown_05#UNK/UNK
AGATCTGGTCCCTGCATGTGGACAGGTTTCCCCTCCTTCAGGAGGAMGACAAAAGCCAAGGCATTAGCCAGGCCAGCACGCACCCAGSGCATGMAGTGCTTGTGSAAASACCAAGTATGGGCAKAATTCCAGCTTCACGCTTTCTATAGGCTGAAGCCAGTTGWCTATGAGAGTGCCCATTGGTCAAACCCAGCCTCGAGGAATCTATAAGTATTACCCCTGTGGGTAAACAACTTGCCCCCTCWTTCACTTTGTCTCTGTACTCGCTCGAGAGAGNAGCTCTCGAGCCASAGCCTCTGCCATTGAGCTTATTGTTATTAGCTTCTATCAKACATGCASGCATACTGAAGCCTCTGCATCKTGAGAAGCACTCTGATMGTGAGGATCACCCCAGAGGGAGGACCTTCGCTGAGCCCGAGAAGCCAGCGTCGSCACAGCCAGTCGTACTGACSGGGAGAGCCCAYCGCGCTACCGGAGGACTGGACCAGCCCCCGAGGGTAAGATCTGCCCAGMTGTTAGGGAGAAGGGACTTAATNGAGACWGAGTCCGCATATMCCTAGCCCCGCCATAGCGGGAGWAGAGCCGCCACGTGTGCSGCTCSGAGCCCTGTNAACCRCAGGGAAGACTAAAGCATTGBTCGTGCCTATACTGCACCAANCCSGGGACTMTCCYGAKCGTCCSGCTGTRCCTTTAAGNCCAGAAACSGWGAAGCCGSARCTMAGCSCAGCCKCGKTCT
>cAur-unknown_06#UNK/UNK
AGYCCCTCCCAAACCCASCCCTGACCCTGACTCTGCCYCCATTGCTCATCCTGGCTCCAGCCTTTACCCYTGGCWTTGACCCTTGGGKATTAAYCTCAGRMAGCTAAGCTMCAACCCAGCCTCTRCCWCTCAGWRCTGGMCCTCAGCTGAGCCCTTCCCAGAACACTCAGCAGKACWGCTGAGGGAAGGAGACTTCTGAACTTCCTYWCTAACTGTTAGAAACTCTCNCACTAGTTCAGAGCTTAGCTTTCTGACATCAATCAAGTAAKCCTGGAGCYTGGGTGAGCAAATGGGGCTAGAGCAGCAGGTGGCAGCTCTAGACAGAGAGAGMWSTAAGGCTGAGTCTGGAAAGCAGGCTGGGTTCTCACAGCCCTGGGMCTCASTAACAAGAGRAGGRCAGTTCTGTGGGANTGGCAGAGGACCAACAGGRAAGAGAYAAGAYAGAAGRCRTGGGGACTGCAATGTTGCTAAAAAGACAGGAGRTGGSAGCAAAGACCAAGACATGGAAGGACTTKATC
>cAur-unknown_07#UNK/UNK
GTCACCTCCTGCCAGCTCAGTGCATCTGTGCTTGGATCACAGCCAACAGGGAGSTGAWAGAAAACTSTGGAAGTCAAAASSTTCAGGGTCTGTGCAAGTGGCAAAAGATCCCAGGATGATTCAGCATCCAAGGTTCTCCAGATCAGAGAAACACCTGATGGAAGTCAATGATCTCCACCTNTCAAAACAGTGACCCTAAAGCCAGAGCCTTGGAGCTCTCCTGGATCNCAGCAGCTGTGTCCAGCATCTCCCCCACTCAGACATCTCTCAGGCACAACCTGCACCAAGGGCCAGCACCAAGTCAGACTTCTCCAGGCTCAGWTCTTGTRCYCTDAGAATGCCAAAGCTTTGTGAGRGTTTGCYCTGAGCTCCAGCAGAAGGAAACTGAACTCCAGGRSGCNNCTCTGCCAGCCYCCTCTCCACCTCTCTGTG
>cAur-unknown_08#UNK/UNK
AGTGCAGGAGAGCAAACTCTGGCTCTGGGTTCTGCAGCACAAAGGCCAAGGCCTGAGCACAGCCCCTGGGCAGGCAGCTCCTGTCCCTCATGTGTGGGTCAAGGCTCTTCAGGTGCAGTGGGGGTGGGGGGTGGGTTTCATAGCAGCATAGCAGGGCCTAGGTTGGAAGGGACCTCAGAGCTCATCTGCTCCAACCTYCCTGCCATAGGCAAGGATGNCTCTCCAWTAGNNTCAGCTGCTCAAGGCCTCATCCAGCCTGGCCTTCAACASCCTCAGGAGAGGGCATCCTACCTGGGCAGCCTAWTCCAKAGTSSCMCAASCCNCNTANTGAAGAWCTTCYTCCGAAGGCCCAGTCTAAACCTCNTTTTCCTCACCTTCCAACCTTTCCCTCCTGKCCTGTCACCAGACACCCTCATGAAAAGTCCCTCTCCAGCCTTNCTTTAGCATCCCTGTAGGGTTTGTGATGCTGAGTGGAGGACAAGGGSCTGACAGTCCCCAGCCTTCCTGGGGCTGTGGARAGAGGCANTGAGGCCTCCCAGTGCCTTAGGACAGCAGCTCCTCACAGGCCTCAGGGSCAGAGAATTGCCAGAGSCAAGAGGGCACAGYCTTGGCTT
>cAur-unknown_09#UNK/UNK
AACAACATTCTCAMAAGGGKAACAGCACCAGCAGCAGCCAAAAMTAGAGAARCCAGGCTGGGNCTGCACTGAGTGACATCAGAACTGCTCTGCAGGAGAAGACAAAGAGTTTATTGCTTCTGAAAGCATCCAGGGATCAGTTTGCTCAGGGCAGCCTTGAGCTCCTGGTTCCTCAGGCTGTAGATGAGAGGGTTCACTGCTGGAGGCACCACTGAGTACAGAACTGACACCACCAGGTCCAGGGATGGGGAGGAGATGGAGGAGGGCTTCAGGTAGGCAAAGATGMCAGTGCTGAKAAACAGGGAGACCACAGCCAGGTGAGGGAGGCAGGTGGCAAAGGCTTTGTGGCGTCCCTGCTGAGAGGGGATCCTCAGCACTGCCCTGAAGATCTGCACATAGGACACCACAATCAACACAAAACAGACAAAGAATAAACAGRCACTGGCCACAAGAAGCCAAAGTTCCCTGAGGTAGGATGTGGAGCAGGAGAGCTTGAGGATCTGGGGGATTTCACAGAAGAACTGSTCCACAGCATTGCCCTGGCAGAGGGGCAGGGAAAATGTATTGGCTGTGTGCAGCAGAGCATAGAGAAAGCCACAGGCCCAGGCAGCTGCTGCCAGGTGGAGACAAACTCTGCTGCCCAGGAGGGTCTCATAGTGCAGGGGTCTGCAGATGGCAACGTAGCGATCGTAGGACATGGTGGTGAGGAGAAAATACTCTGCAKCAATTAGGAATAYGAAAAAGAAGACCTGGAGAACACATCCTGCATAGGAGATGTCCCTGGTGTCCCTCAGGGAATTGGCCATGGATTTGGGCACAGTGGTGGAGATGGCACCCAGGTCAAGGAGGGCGAGGTTGAGGAGGAAGAAGTACATGGGGGTGTGGAGGTGGTGGTCCCAGGCTATGGTGGTGATGATGAGGCCATTGCCCAGCAGGGCAGCCAGGTAGATGGCCAGGAAGAGGCAGAAGTGCAGGAGCTGCAGCTGCCTTGTGCCTGGGAATGGCAGGAGGAGGAAGTGGCTGATGGAGCTGCTGTTGGCCATCTGCTGCCTCTGGCCATGGAGNCCTGTGCAAGGAGGGAAAGGCAGTGACAAGTYAGGGCACACTTCTCTCAGSCTCATNGNAACCCCTGTSCCTGAGCTGCATGAGGAATGGATCAGCTCAG
>cAur-unknown_09#UNK/UNK
AAGAGGTTGTTTTCAGATAGCTTTGGAAGACTATAGGGAAGATTTGCCTTTGCTCGAATTAGAGAAAGCTATGTTTTGTCTTTGACTCTGAGGGTAATGTAAACACCTTGTAACTGAAGGAGAGAAACTRGGCAGAATTTGGTTGGATGTGTTAAAATATTGTTTTGTTATTTTGACCTATTGTATGCCTTAATTACAYGYATGCCAGTAGAAAATGACCAATTGAGATGTGACACATGTGCCTTCTGATAGACTATATAACTTTGCTGTATAACGTAATAAACGTCTTCGCCTGCTTACATCTTGTCCTGAAAGCATTGCTCGAGGTGATT
>cAur-unknown_10#UNK/UNK
AATCAATGTGATTGATAAGCACGCTTCAACTTTATTGCCCGGATACACAGCTTATATAGCATCTCAGCTAAWTATGCACAAGCGTCACTATTCTATTGGTCTCTGACTGAAGGCAACATTATAATATCCAGCCCACCTGCAATTAGGTCTGTGTACAATATCAAAGGCTCTGTGTACATTCCSAGAAAACTCCCTTCTSACTAGCTCTTCCTTTCCCATCCAATTATCTTACCTAGCTKTTCCTTTCCCATCCAGTTATCTTACAAACACACAGCTGCKAGAACAGCTACGAGGCCATAGTGACCTTGCTGCTTCAGCAAGTCAGCTAACTATGAGCAGTAAACAACAAGATGGAGTAAGGCCTACATATCCTGCTCAAGTAGCTGTTCCACAGAGACATGTCCCTTAGATTTAAGCCATTCTCCAACAATT
>cAur-unknown_11#UNK/UNK
AAAAAAAAAAAAAAAAAAAAAAAAAAGGCRCCGGGTGGAGAGGGTGGTTAAGAGGGTGGTTACAGCAGCATTACACCAACATGGTTACTACTAGAAGTAAGGCTAGTAGAAGAACAGTGGGCACCCAAACAGAGGCCACTCACAAGCATGCAGGTGTTCAGGTGGGTGGCTGCAGTGAGTGCTGGGATCTGGCACTCGACATGGAGGATGGAAGGAACAACTCCTGTGTCAGATGCGAGCAGATCAGTGATCTGATGAGCATGGTGGCTGAACTAAAAGAAGAGGTAGAAAGGCTAAGAGCTGTAAGAGACAGCAAAAGGAACATTGACTATTTCCAAAATCTAACCTCTACTAAACTAGAACAGGGGGTGACTCTTAGTGGAGCAGGGAGTTTGGTACCTTCCCATCAGCAAGCCTCTCAGCCTCCCTGCAGTAACCCACAAGGGCAGGGCCAATGGGTGCAGGTCTCTGCCCGACGGAAGAAACGCAGACGGAGCAAGCCTGCTACTTTGAGCAACACACTACCTACAGTGCAGGTACAGAATAGGTATGAGGCTCTGCAGGAGGAACAGGTCATAGGTGAGGACGAGGACTCAAGGAAGGCAGAAGCTGAACCAATGACAGGTTGCCTCAGGCCAGCTATCAAAACTAGACCAGAAAAGAAACCTCGCAGGGTCATCGTTATAGGAGACTCCCTACTGAAGGGAGCAGAGGGCCCAATATGCAGACCAGACCCCTTTCATAGGGAGATCTGCTGCCTCCCTGGTGCCCAAGTAAAGGACATTATAGGCAAAATTCCCAACCTCCTGAGTCCTTCAGACTACTACCCACTGCTGGTCTTTCAGGTGGGTAGTGACGATGCAACAACAAGAGGCTCGCAATCAATTAAAAGTGATTTCAGAACCTTGGGGCACCTGCTAAAGGGATCAGGAGCTCAGGTTGTGTTCTCTGCTATCCCTCTAATGTCAGCGATGGATGAGGGAACACTGAGGAAGAGCCAACAGGTCAATTCATGGCTCCGGGGCTGGTGCCATCGACAGGGATTTGGGTTCTACAATCATGGCTTGGTTTACAAGGCACCAGAGCTGCAAACAACTAATGGGGCACACTTGTCCCAGAGGGGGAAAAGGATCCTGGGGCAGGAATTGGCAGGGCTCATTGATAGGGCTTTAAACTAGATTTGAAGGGGGAAGGGGGTAATAGTCTCCTGCTGGCCTGTGAGAAGCAGAGGGGCAGCTCACCAGAGGCAGTGGGATGGAGAGCTGCTAAGGGCTCTCAACTTGCTGCCCTGAGGCCAGACACAGATGACACACCAGGACACCCTGTGAAAACCAAGGGGAGTTGGCACAAGAGGACGACAGGGCCAGCCCAGCTGAAGTGCTTCTATGCAAATGCACGCAGCTTGGGCAACAAACAGGATGAATTAATAGCCACCGTGCTGCTGGGAGGCCATGACATAGTGGGCATTACTGAAACTTGGTGGGATGATTCCCATGATTGGAATGTAGGGATAGATGGGTACAAGCTTTTTAGGAAGGATAGGCAGGGAAGGAGAGGAGGAGGTGTTGCCCTCTATGTCAAGAACCAGCTGGAGTCAGCAGAACTCCACCTGGGGAGGGATGATGAGATGGTTGAGAGTATATGGGTTAGAATTAAAGGCAAGACAGGGGAAGGAGATATTACTGTGGGGGTCTCCTACAGGCCACCTGACCAGCAGAACCAAGCAGATGAGGCCCTCTACAGGCAAATAGAAGCGGCTTCCAGGTCACAAGCCCTGGTCCTCATGGGWGATTTCAACCACCCTGACATCTGCTGGAGGGACAACACAGCAAGGCACCAGCAATCCAGGATGTTCCTGGACTGCATAGAAGACAACTTCCTCCTCCAAATGGTAGAGGAACCAACAAGAAAAGGTGCTCTGCTGGACCTTGTTCTCACCAACAGGGAAGGGCTGGTAACCAATGTGAGGCTCAGAGACTGCCTTGGCTGCAGTGACCATGAAGCAGTTGAATTTAATATCCTCAGGGCTATCAGGAGGACCTATTCTAAGCTTATGTCCCTAGACTTTAGGCGTGCAGACTTCGATCGCTTCAGGAGTCTGCTAGCCACAGTGTCATGGGACAAAGCCCTGGAGGGAAGAGGGACCCAGGACAGCTGGTCAGTATTCAAGGACCACCTCCTCTGTGTCCAGGAGCTATGTATACCAACAAAGAGAAAAACAGGGAAGAACGCTAGGAGGCCTGCCTGGATGAACAAGGAGCTCCTGGACACACTATTACTTAAAAAGAAACTCTACAGGCAGTGGAGGGAAGGACAGATAGAACAGGGGGTATATAAGGAAGCTGCCCGAGCAGCAAGAGGCC
>cAur-unknown_12#UNK/UNK
TTCCCTTTTYGAAAASRGAAYGGCCCAATGGCACATYAGCCATTCAAATCCCKCCAATCAATTCAAAATGTTTATGTGGCGAGTAAACTGCACACGCCTTCTCTCATGGCGTCTGACACGTGCAGTCGCCTCTCTGAAAYGTGAGGCTYGGGGATCGGGTTCAGCTTCCACTCCCCTCCAGGCAGCCTTAATGGHDCCTGCCTATTAGGCTCCTCGACCTCAATCTGGACCCTGTAACAGAGAGGGAGGAGAGAGGSGCAGTGGCTCAAAACAGATTTAGCTGTCTTGTTAATGCCTCTTCCAGGACAVCCY
>cAur-unknown_13#UNK/UNK
TCACTCAGTGCAGGCCCAGCCTGGCTGCTGYACTTTGTGGTNGTGNTGTTTAATGTCAGCAAGATTNTCCTTGATCYATAAGGGTAGAGCTGGCCANGCTCCATCTCCACAGATAAGGAAAANACTTGCAGGCARACAGCAAGAGTGCAAAGGCTCCTTGGCTGGGTCAGGGATGACATCCTGAAKATTCATGGTTCTGCCCAATGTAAAACTGAACATAACACASCAATCCATTTTTACTCATCCTAACATACTGNTCTGCTGATGCTTTGTATTTGCTAAGGAAAGGCACTGAGTCCTGTTGATACTGACTMTGGCCTAATGTTGTTTGTCMTTCTTTMAAATTTCTCCTAGNTAAAAMTTCCAGAACTCTMATATCCTCCATAAATTTTGTTAAATCACATTTGAAACCACATWTAAAATGAWAATTTGAGAACATAACATGCTTGAACCATTCTCTTTTGTGACATRATACCTGAATTCCCCNNTTTTTTRWCTTTTATAAGCTAAAATGAAAATGTNTTTTGTGCTATAATTAATTTTGACTTTCCCTTTAACTYTTTAAAGTTATGACAGACTGGTGAGTTMCCATATCAACCCATGTGAACATACTCCCTAATCACACANCANTGAAGCAATCATGATANTCAGTCCTANTTCAGATGGGTTTTGGTACATTCTTCTGATTGATGCTTTTGATCTCAGATTATCACAGCAGTCATTGTGATNNNTGTTAGGTAGCTCTGCTGRTCTTCAGCTCCATGGGAAGTGMTCTTTGTCCTGTCCTCTTGATTCTTGTGCTATTGTTTGCTGAGATGATTGCAGTACTGCWTTGCAAAWTTGATGTTTCSAGGTGTTGACTTGGGTTAGCTATTTCTTGCTGGTGTCACTAAAGCCTTAGTTATAAAATATGCACAATATGCATCCCTCTTGCTCTCTCTCT
>cAur-unknown_14#UNK/UNK
GGTTGGNAGTGATGGGGACTGAGCTGATCCATTCCTCRTGCAGCTCAGGGAGAGGGRTTACAATGAGGCTGAGAGAAGTGTGCCCTAACTTGTCACTGCCTTTCCCTCCTTGCACAGGTCTCCATGGCCAGAGGCAGCAGATGGCCAACAGCAGCTCCAGCAGCCACTTCCTCCTCCTGCCATTCCCAGGCACAAGGCAGCTGCAGCTGCTGCACTTCTGCCTCTTCCTGGCCATCTACCTGGCTGCCCTGCTGGGCAATGGCCTCATCATCACCACCATAGCCTGGGACCACCACCTCCACACCCCCATGTACTTCTTCCTCCTCAACCTCGCCCTCCCTGACCTGGGTGCCATCTCCACCACTGTSCCNAAATCCATGGCCAATTCCCTGAGGGACNCCAGGGACATCTCCTATGCAGGATGTGCTCNNCAGRTCTTTKTCWTKMWSTTTCTYATGGYRGCAGAGTATTWTCTCCTCACCACCATGTCCTAMGATCGCTASGTTGCCATCTGCAGACCCCTGCACTATGAGACCCTCCTGGGCAGCAGAGTTTGTCTCCACSTGGCAGCAGCTGCCTGGGCCTGTGGSWTTCTCAMTGCTCTGCTGCACACAGCCAATACATTTTCCCTGCCCCTCTGCCAGGGCAATGCTRTGRASCAGTTCTTCTGTGAAWTCCCCCAGATCCTCAAGCTCTCCTGCTCCACATCCTACCTCAGGGAACTTTGGCT
>cAur-unknown_15#UNK/UNK
ATCACAGTATCACCAAGGTTGGAAGAGACCTCRAAGATCATCGAGTCCAASCTGTCACCACAGACCNCATGACTAGACCATGGCACCAAGTGCCACNTCCARTCCCCTCTTGAACACCTCCAGGGABGGTGACTCCACCACCTCCCNGGGCAGCRCATTCCAATGGCKAATGACTCTCTMAGYGAAGAACTTTCTCCTCACCTCCAGCCTAAACTTSCCCTGGCACAGCTTGAGACTGTGTCCWSTTGTTCTGGNGCTGNTTGNGNGAGAAGAGGCCAASCCCWTCCTGGCTACAACCACCMTTCAGGTAGTTGTAGAGAGCAATGAGGTCATYCCTGASCCTCCTCCTCTCCAGGCTAAACAACCCCAGCTCCTTCAGCCTCTCCTCANAGGGCTTGNNCAAGGCCTCTCCCCAGCCTTATTGCCCTTCTCTGGACACCTTCAAGTGTCTCNNTGNCCNTCNTAAACTGAGGGGCCCAGAACTGGACACAGGACTCAAGGTGTGGCCTAACSAGTGCAGAGTACAGGGGCASAATGACCTCCCTGCTCCTGCTGGCCA
>cAur-unknown_16#UNK/UNK
CCTGCAGSCASACAGCAAAAGCTCCTCCTGCCCTGAGCCNNCCTGTGCTCAGCAGGCCTGCAGAGAAACTGAACATCAGTCTGCAGCCCCCCAGGGAACATTTGTGCCTCAAGARATTGCAGAGCACAGAGGCCTTGGATGCCACCACCCCAGCACAGCCRAASCCCCCCACAGCTGACACCAGCCCCAGGCGCTCCGAAGCTCAGGCTCAGCACAGCACCCACGNCTGACACCCCCACGGCACCCAGCACACAGCCTGCCMACAGCTCCCCCCMGCGCCTGGCCCTCAGCCCAGCCGCTGCCCTGCAGCACAGCAGCTGCCSKGCAGCTGCCAGCACAAAGCCTCCAACCCCSAGGNCTCCCCCACRNCCCCCCWCAGCAGCCTCTGCTGCAAGCCACACCCCACGCTCACCACCACCTCTCCTGCACACAGCAGCCCCCACAGCGCCGCCCACAGCTCAGCTCTGCTGCCAGCCCAGCNCCCAGCACAGGGACACAGGGCCAGGGCCAGCCCYTGCAGCCCACCAATGGCTCTGCCTGCNACACAGCAGCAGCCAAAGGGGGCCTGCAGCTGCCCCCAGCAGGGGGAGTCAGCASCACAAGSAACCCC
>cAur-unknown_17#UNK/UNK
AGGGAGCCGAGCCGARGGGAGCCGAGCCGARGGGAGCCGAGCCGAGGGGAGCCGAGCCGAGGGGAGCCGAGCCGAGGGGAGCCGAGCCGRGGGGAGCCGAGCCGRRGGGAGCCGAGCCGRGGGGAGCCGAGCCGANGGGAGCCGAGCCGARGGGAGCCGAGCCGAAGGGAGCCGAGCCGCTCTTGCTTCCCTGAGTGCGACTCACTYCGAGACTATAAATCCAACTAAAAATCTCTCCTTTTTATRTAGAAATTCAGGAATGGTATTAATTGCAAAAGTAAAAAGGCTCTGAAATCACCTCCACCGGATCTCCTCTGAAAGATGCAAATGAATCTAGAATGGAAAGGCAAATTGCAAGTAGAGCAAAACAAATTTTCAAAACATACCTWTAAAAGGTGAATCAATTAAACACTGTGGACCTTCCTTTGTGTGTATCAGGGAGAATTTCTCCTTCTATTTCTTTTTTAATTTGTTGTGGGGTTAGTCTTTGCTTTTAATTTGAATGGAAAGCCCTCTGAACAGAGCCTAGCAAAGCTGCTTCCCCATGCACAAGGGCAAGAGAAGCCCCTAACTGGTCTGTTAACATGCCTTTCAAGTGTTTCTGATGGCATCTGAGGTGGGTCTAGGGGCCCCCAAGGAATCTTTTAGTTGGACATTTYGGAGCGCCTGCCGCCGCCCAACAGCAACTACCCCGGCGCCTCCAACAAAAACACCCACAGAAGACCCTCCATTGGCACCCACACGTGCCTAACTTCCCTTTGGATAGCCCCACACCCATCACAGATGCACACAGACCCCCTTAGGAGGGGTGGCAATACTGACCGGTTAGGCTGGTGTCTTTTGCCACCATGCATGGGAAGCACCTTAGCCRGCCTCTGTTCAGAAGGTTCTCCATTCAAATAAACTACCAAACACCAAAACCAATGAGTATTTAAAAACCCTACAGTACAGACAAAGGAAAATCCATTAGTTGTGTATTAGAGATACACACTGTAAGTTTACANTATTTCAGAACCTCATTTCAAAGCCTCTTTTCAGACAAATTAATACCATACTTCTACACCTAGTTAAACAGGAGAGCTATGAAGTTGGAGGGGTCAGGATTAGCTGGCCTCTTAGGGATTTTCATCTTCTCCGAGAACATGCAAGCATTTCAAACAAGCTGATACAGAAGAACCCCAGAGAGTAGAAGAGGCTGGCACTTACCTGGAAGGGAGCCCCAGGAAACAGCTGAGCAGCGCCGGGCACCACCGAGGGGAGATGAGCCCCACCGAGCCCAGTCTGAGGTAGCCCAGCTTGACAGAACCACCATCCTTTTAGGGAAAGTAATTTCTCTTSCTTTACTGACTGGTCCTAACCATACAATTACTGGCCACACACCCATTTACAATTTTTGCTTCATGTGTCTCTGGCCGTGCTGTCACAGAGACACAGAACGGGACTCCAACTTTTGTTGATTTTTTTTTCCCTACATCTCAATTGTGCCCACACTCAGCTGCACGCTCCAAACAAACTACGTGTCTAACATTTTARGTTCTTTGAGGAACTTCCCCTGGTTCCACACAGACAATCCTACAATACCTTATGTTCTTAGGGGATCTCCCTGATCCCATACACTTTAATCCAGTTTCCATTTTGCATAATGCAACTCGGTACCGCCTTTTCACAACACAGAATACATGAAAGAAAATCCATTCTTTGTGTATTACAAAAGCACACTGTATACTTAYATATTTCAGAACCCCGTGTAGCTCATTTCAAAGCCTCCTTTCATACAAGTTGATACAGAATAGTGTTTGTGTACATCTACTTGAACAGGAGAGCTATGGAGTTGGATTGGTAGGGTTGGGGGGAGGGTCAGCATGAGCTGGCCTCTTAGGGGTTTTAATGACGGGGGCCCAGCCGCCAACATCTCAGGGGAGGGAAATTCTCTTCCTTCCCTGAGAGAACTTGGCTGACTCACCCTAACAACCCAAATAAAAACCTCTGTTTACATTAGCAGTAACTAATGGTATTAATTGCTATATAGGCTTTGCAATCACCCCCACTGGATCTCGTTACATACAAAGACTTCCAGAATGTATAAACAAATTCCAAATAGAGCAACACAAGGGTTAAAAACAGACATTTTGTAGTTATCAATTAATTTTAAAAGGCAGCCTTCTTCNNGTGTGTCCAGGGAGTTGTCATTCTTTATTTCTTTGGGCTTTYTTGCTTCATCCAGGATTTTTTTTGGTTTCTTAGTTTAATACAAACACAAACCCTTYTCCCCCCCTCACACACAAATCTCACAACAAATATAACTACAGTAACAACAACCAGTCCTAADCACACAACTATCGGCCACACTCCCATTCACAACTTTTGCTTCATCCGTCTCTGGCCGTGCTCCTGGCAGNGAGACGGAACCACAGATCGGGACTCCTGCTCRCTTTGTAGATATTTTGTATGTCTCAGTCATGACCACACTCACCCACACACTCAAAACATCAACACGGTTCCTAACATTTCAGGTTATTTTAGGAACTTCCCCTGCTTCCACACTGACCAGCCTACAATTCATTACATTCTTAAGGGAGCCAGTTCAGAGAGCCCCACACCAGTTCACTTCACCGCTTCCCTTCATC
>cAur-unknown_18#UNK/UNK
TAGTAAACACCCCAGCGCGTGGCTGAGAGAGCARGCAGCGGCGAGGCMCTCGGCTCTGAGAGCTTGCTTYTGGCTTTKCTTTCCTTGCTTTTCAGGAGGTAGGGGGCTGGTGGCTCGGGACCTCCTGGAGAGGGGAGGAGGGGCAGCAGGCTCGGGTTGCCTACGTGCCTGAGGGCAGTGACGCAGCAGGGGGWGGGGTTGCCGCGGRAACCGCGCGCAAACCAAACAGACCCCAGCGCGTGGCTGAGAGAGCAGCAGCGGCGAGGCMCTCGGCTCTGAGAGCTTGCTKCTGGCTTCCCCTTCCCTSCTTTTCAGGAGGTASGGGGCTGGTGGCTCGGGACCTCCTGGAGAGGGGAGGAGGGGCAGCAGGCTCGGGTTGCCTACGTGCCTGAGGGCAGTGACGCAGCAGGGGNWGGGGTTGCCGCGGAAACCGCGCGCAAACCAAACAGACCCCAGCGCGTGGCTGAGAGAGCAGCAGCGGCGAGGCACTCGGCTCTGAGAGCTTGCTKCTGGCTTCCCTTTCCTTGCTTTTCAGGAGGTAGGGGGCTGGTGGCTCGGGACCTCCTGGAGAGGGGAGGAGGGGCAGCAGGCTCRGGTTGCCTACGTGCCTGAGGGCAGTGACGCAGCASGGGSAGGGGTTGCCGCGGAAACCGCGCGCAAACCAAACAGACCCCAGCGCGTGGCTGAGAGAGCAGCAGCGGCGAGGCMCTCGGCTCTGAGAGCTTGCTKCTGGCTTCCCTTTCCTTGCTTTTCAGGAGGTASGGGGCTGGTGGCTCGGGACCTCCTGGAGAGGGGAGGAGGGGCAGCAGGCTCGGGTTGCCTACGTGCCTGAGGGCAGTGACGCAGCAGGGGGAGGGGTTGCCGCGGAAACCGCGCGCAAACCNNACAGACCCCAGCGCGTGGCTGAGAGAGCAGGCAGCGGCGAGGCACTCGGCTCTGAGAGCTTGCTNNTGGCTTNNCTTTCCTTGCTTTTCAGGAGGTAGGGGGCTGGTGGCTCGGGACCTCCTGGAGAGGGGAGGAGGGGCAGCAGGCTCGGGTTGCCTACGTGCCTGAGGGCAGTGACGCAGCAGGGGGAGGGGTTGCCGCGGAAACCGCGCGCAAACCAAACAGACCCCAGCGCGTGGCTGAGAGAGCAGGCAGCGGCGAGGCACTCGGCTCTGAGAGCCCGCCTTCT
>cAur-unknown_19#UNK/UNK
TGTTGTAGAATGGCTTAAATCTAAGGGACATGWCTCTGTGGAACAGCTGCTTGAGCAGAATRTGTAGGCCTTACTCCATCTTGTTGTTTACTGCTCATAGTTAGCTGCCTTGCTGAAGCAGCAAGGTCACTATGGCCTCGTAGCTGTTCTCGCAGCTGTGTGTTTGCAAGATAACTGGATGGGAAAGGRACAGCTAGGTAAGATAATTGGATGGGAAAGGAAGAGCTAGTGAGAAGGGAGTTTTCTTGGAATGTACACAGAGCCTTTGATATTGTACACAGACCTAATTGCAGGTGGGCTGGATATTATAATGTTGCCTTCAGTCAGAGACCAATAGAATAGTGACGCTTGTGCATATTTAGCTGAGATGCTATATAAGCTGTGTATCCGGGCAATAAAGTTGAAGCGTGCTTATCAATCACATTGATTGCTGCTGTCTTCCCTCGCCGCTCTCCGACATCTGGCGCCCGAACAGCGGACGATCCAGTGGGGTAAGGGAGAGAACCCCCGACGCGGGATAGGAGGCCTGCGGAGACCTTCTTGCGGTCGGGGTGGTGGCGAGCCCGGAAAAGCATCGATTAGCAGCGAATCGAGGGGCAAAAGTGCGACTCAACGCTGGCGTAGGGAGTTCGTACCGTGCCTGAGCTGGGTTTCCTGAATTGGAATTAAGCTCGCCGTCCGGGTAAGGGCTGCTACTCGACTTCCACGGGTTTTTGAAGGCTGCACTAAGGGATGGAAAGCGAAGTAGCTCTTAACTTATTTTTAAGTTTCCTTGAGAAACGCAGTGTAGAGGATGTGGATTTAAAGAAGCATCCTGAACGTTTATTGCAGTTTGGTAGGGAGAATGGTTTTTTCAAGTCGTCAGAAGATGTGTTTAGTGTTGATGTATTGGAGAGAATATGGAAACAAACTGTGGGACTTGATCATAGATGGTGACAAAAGTGCCGTAAAGCTGCAAAAGCGGCCGGGGAGAGGCACGGTGAAGCACTCCGCGAAACAGAAGAGCTGTGCTAAACGCCCTCCAAACTGTCCTCTCCGAGAGAGGTATTACTGACAATTCTGGCATTTTGAACGGGCTAACTATCCTCTCCGTGAGAGGTGTTACTGAGATTACTGGGATTTTGAAAGGGCTATTAGCATGGGCCCGGAATCATGATTTTATCCCCAGAGCAACCGAAGCTTTTACTACCGAAGCACGGGACAAACTGGAGCCCAGCTGTGGGATGAGGTGCTAAACACCAGCCACCATCCCAGCAGGGAGGAAGCGATAAAAAGGCAGCGAAACTTGTGGTTCAGCGTGTTTGATCCCATTCATCAACATCTCCTAATATCGCCAACGACAGCTCGGATTCGGAAGAGACAACACCGACGCTGAGAAATCAAACAGTGCCAACTTTGTTTCACAGTCCCTCTTAGAAAAATGGAGCGCTTGGAGGCTCGCGGTTACGGCATTCTTACGACCGCACCCCTTCCGCGAGCCCCGACGGCCCCCACGGGCACCGACGGCTCCGACCGAGGCGGCACCGACCGACGCACCACCGACACCGGCAGCACGGACTGTAGCGGCCCCCACGGTGGCCCCCACGGCAGCAGCCACGGCAGCGGCCCCAGCGGCCGTCCCCATGGMGGCGGCACGGCGGCGGCCCGGCAGCGGCCAGCACCAGCGGTCACCTCACCATCCCCCCGCCTCCTACGCCCCAGACATTGTCAGCAGAAAACATCACTACGACGGAGGCTACAATCGAATTCCGAAGGGACGATAGTGTAAGGGATCGGGAGGTGGGAGGGACGGGGAACTGTCCTGCTGCGCCGCTGGAAAGGTATTGTGAGAAATGCAGTAATAGAAGGGAATCTGTAGATTTTCCTGTACATGCATCTCCTGTGGTATTATTCTGGCATTTGACAATGCTAACGAAAAAGCTAAACAGGTTCTCAGCATTTTACCAATAGGTCATTCTTGAGTCCACAAAATGTTGTTGTCGAGTCCCATCAACACGGTCCTCTGGGTCACCAACCCTGTGCTCTGTTAATTGGCAGATCGTCTWCCTCTAGACAGGGCATCCTTATAATTCCTGGTTYAATAGATTCTGATTATGATTGGGCTAAGAAAGTTATGCTCTATAGCATTACCCCTCCTGTTAGTACTCTTGTTGGGACAGAAATTGTTCAGCTAATACCATCTGAGTCCTGAGTGCCTAAAACTTTTAACAGGATTTGAGGATAAGAAGGCTAAGGGAAAATTAGAACAGATTGTGACTATCAGGAGCTGATATCACTATTGTATCTCGTCATAAATGGAATGGTCTTGAGTTTAAAAGGTTTAAAGGGTTTTAAATGTATCCAAACAACCTGGGTCAGCAAAGAGCCAGTGCAATTAGCTTTTACGACGGCAAATCAATCACTGTAAGACCGTACGTGTTAACCCTTCCAGTTACTCTATTGGGTTGAGACACCTTAAGTTAGCTAGGAGCAAAACTTGTTTCTGTTCCTTTTCTGTGGCGGCTACTGGTCAGCAACCAACCCTCAAATTAAAATGGAAAACAGCTAATCCAGTATGGGTGGAGCAGTGGTCGCTCAGGCATGATAGGCTGCAAGTTGTTAGGACCCTTACCGCAGAAACAATTGCAACTACTGCACACCTTGCCCCCCCTCGTCTCTTTTCTGGTACGANCTAGTCTACCAAAGCTCTGTTCTGATTTAAAGCAACAGTGCTAATTTCATAATTTCTGATTGTAATGTCTTTYAGAGTTTGGTTATTTAGAGTTTTGTTAAGTTTTCCTAGTAAGCATAATGAATAGTAAGCATTTGGTATTTACAGGTACTTAGTACATAGTAATTGTAGCAAGGTATAAGGACTTAGTAATGAGTTCACATTGTAAGATTTSTTATGGTTCGAACCTTCTTAGTTGTGTGCCTAGGCATTTCAAAGGAGCTCCATGTAATATAGTTAAGGTTTGTAGTAAATAGTAATATAGTTAAGGTTTGTAGTAAATAGCTATTAATTTTTAAAAGTATTCCTTAGCTAATGTGTAGAACAATCAAGACTATGAGGAAACAGCATTTCCCATGAAGTTGAACATCGATCACAATAACTGTTATGATAATCTGGGATCAAAAGCATCGATCAGAAGAATGTAYCACAGCACCCTGTGAATTTGGACTGAATATTATGGTTGGTTGATTGTTGTGTGATTAGAGAAAATGTTCATATGAACTTATATGTTATCTCACCAGTTTGTTATAATATTACACACTTAGAGGGAAAATCAAAATTCATTATAACACAACATGCATTTTCATTTTAGGTTGGAGACTRCAACAAACACATGCATGCCAAAAAGAAAAAAAAAAAAAAAAAAAAAAAARRRAAAAAAAANRNRAAAAAARNNAAAAAANNAAAAAAAAAAAAAAAAAGGGAAAAAGGGGGGAAAGAGAGAACACCCCATAGCAAAGAAGTTTTTTAATGGTACCAACAAGAAATAGTTAGTTCATGTCAACACCTAGAAACATAAACTTTGCAAAGTGCTGCAACCCTCTCACCACAAGACAGCACGAACGTGGCACGGCTGTCATGAAGTGACGGTCAGCAGGGCTGCCTAGCGCTGACCTCAACGCCTGTCACAATAATCCAA
>cAur-unknown_20#UNK/UNK
AATGCTGGCGGCGATGTCCACACTTGTCGCAGGGTCCTGTGTTACTAGGGGAAGGGTCTCTTGAGCGAGAGGGACCACTCCGGGAAACTGGGGCAGCCCTTCTTCTGGATGAGTTGTCCCCAGTGTGGCCACCTTGCAGTTCCCGCACTCTGTTCCAGAGGGCAGATGTGGGTTGGCCATGCCAGGTGTCCATGTCCTCTCCGTGGTCACAGAGGAACCTCCACAGAGACCCTCTTGACATCCCCCGATTGGCTTGGGGTGCTCTCCTAGGGGAAGGTCGCCTGTTCCTGATTGCTGAAACCTGGATCCATTCTGAGGGAGAAGGGGAAAAGGAGGCATCGCTCCCCCTTTTCAGTTCAGACATGGAGGTCTTGATCTCTTTGACAATGTCTTTGGCCATAGTTTCTATGGCTGAGATCAGGGGTTTCTGATTTACGCTGTCCTCATATTCCCTTAAATCATTGGCAAACTCACAGACAGTTTTAGGACTTCCATCCTGTCCAGTCAGGAGTATCCCTCCTAATGTGGGAGCATATTTCTGAGGAGCACCCTGGGTGAGCTTCTTTACGAAGGGCCGTCTCATGGGCACCTCATCTGGGTCCGAAGGGAGCTGGCCATCCCCATAAATTATTTCCAGCACAGCCATCTGTCTCAGGTAGCGAATGCCCTGTTCCATAGTTGTCCATCTAACTGGGGCCCAGGGCAGGTCATCCCTTGAGCGGTACCGGCTCTTGATGGCATTGAGGATCCGGGCCCAGAGAGTGTGTGTTCCATCGAGTTTGGCTAACTCTTTGTCCAGACCAGCATCACGAGTCATGGAGCCTAAAAGCTTTGCCTCCCTCTTATCCAGGTCCACTGTGTCCACCCCCTCGTCCCAGCATCTCAGGGCCCAGCTCAGTATTGGCTCACCCTCTTTCCTTGCGTAATCCAGACGAGTTTGCCTTAGTTCCTTTCTGGGTAACGATGTGACAGTTATTTCCTGGTCTGACTCATCTTCATCCACCGCTGGGTTCTGTGAGGTGCTGGGGCCTGCTGAGGTTCCTTCCTCACCATCTGTGCTTGGCGATGATTTTTGACTTCTTTTCCTGCGTGTGGTGACTGGTGCCAGAGAGACTGCATTGGCAGGAGCATCAGGGGTTAACTGTGGAGCTGCTGGTGGTGGGGCAGACCCTTGTGCCTGGGGCTCAGGCTGAGATCTGGCACACTCATTACAACCTGACCCCTCCCTCTTTGTGTTTACAGAGTGCTCACAATGCCCACAGCAGACACGCCCCCAGTCGTTAAAGAGTGCAAAGGAGTGTGTTATCACCCTCCAAACAGCTCTTAATGGGTTAGCTCGTCCCCCACCCAACACGGTCACAGCAAATGCCCCTGTAAGGATTACATTCAAGCATATGGAGCATATTGCAATGTACAGCAATTTTCCATCACAGGCACATTTATCTACACCATTGGTTTCACAGCCTTCTGCAGGAAAATTTCCTGTGTTAGAAAAGTTACCACTGACAGTGAAACTCAATGAATTCAGGAGATACATGCCCAGCTTCATTGGTAAAGTTTTCATCCATTTGATCAGCATCTCTATCATTAACCACACCACATGGTAAGTTATTAATTTGTAGATGTGGGTCCAAAAGATCCAGCCAAACACCCACGCAAAGGCTTGGACCACCAGGCTCTTTAAAATCGCCATCTCTACTTCCAGTCCCTTTTTCAGACAAAGTTTTGCTTTCCCAAGACAAGATTAATTTCCAAGCCCCACGTTGGAGGCGCCAAAAATTGTGGTGGTTTGAGCCTTAACTGGAAGTTAAGAGCTCAGGTGGGGGGCAAGGCTGAGAATCTCTCCCCCACTCCCCCCCTCTTCCCTCCCAACAGAGAGGGGAGAAAAGGAAAGAGCAAATCCACCAAACAATAATTTGGAGTCGGCTTGGAAGTAGAGAGGCAAAGAGTTGTCTTTAAGCAATATATATATATATATATAACAATAACAGGAAAAAGGTTCACAAGGGCAAGGAACAAGGATGGATGGGAGGGGGACAAAAACAAGAGAATAATACAAAACCAGCCTTTCTCTGAGGAAGCGTGGAGGCAGCAGGTCCGACCACGTGGCAGAGGAGCAGGAGGGTAGCTGCAGTAGCTCTCGTCCAGCAGAGGCAGAAGCCAGAAAAGCCNGGGCCAACAGCTATGAGGTCCTGCTTTTTATACCCTAGCTGGGCAGGAAGGGGGGAGTGGAACAGACTCAGCTTCCCAGGCGAAAAATGCCCTGCAGGGAGTGAAAAGTACCTGCAAGCCCTCCACCCTGCTTTGTTCTTTTGTTCCCAGAAAAGGGTGTTAACCCACCACA
>cAur-unknown_21#UNK/UNK
CGCCCTCCTCGCGGGCTGTGCCGTGCTTTCATGGCGCGCAGGRGGCTGCCGCWGTGTGCAGCTCTGGCCCAGGAATGGTCACGGAGAGCCCTCGATTCGGCGCCTGACGCCGTTCTSTGCCCCACGGTGCCTGCGAGCCGCCATCCTTTGGCGGGGGAAGGGGTCCCGGCGCATTCSGGGAGCTTGCCBTGCGGTTTCCGCTGTCGCTGCAMGCCCGGAACTCCCCGGGGTCTTCCTTCCGGCGMCTGAAGGTGATCTGGGGGCATCCGCGCGGCTTTTNGGGGTGARRRASGRSGTCTGGGGGCACCTCAAAGGCTCTGGGGAGAGCTAAAGTTCTCGTGGGCTCATCTAAAAGGCTCAAGGCTCGTGCAGAGGCAGCTGGGCCCCTGCGAGCGACCCTTTGGGAGCTCTCTGCAGGCTGCCGCGGGAGCCGGGGGGGTCTCGCTGTGGGTTTGCCTTTGGATTCGTGCTGCACGCAGTGGTGATGACGCAGGGACATTGTCATGACCGCTGAGCTCTCTATTTTTTTTYCCCCACCTTGATAAACTTTGTCTTGCTTGTCTTTGAGTCGCAACTGTGCCATTCAGTTAGGGGGTGACTCTGTAGCTTGGATGACACCAAAGAAGGGCAAAAGAAAAGGAATAATTTGTGATGAAAAGCCCACAATTCCTGTAGGATTCCCAGTNCCTACTTAAGAATATCAAGCAGTTTGTGGTTTGGTTGTTTGGTTGGGRTTTTTWTTTNTTGNNNTTTTYKTTTTTTCTTATTGTGCTGCAAAGGTTTGGATAGGAATTTCTAGGTATTAACTGCAGCCAGAGCAATCCTT
>cAur-unknown_22#UNK/UNK
CGCCTGTAATAAGTAAAGGGATGAATTATTTGTTAACCATATAAATGATCAATGSTGGAGTCSTGATCAAGTCAGACAATGCCACTCAATGATAAGACCATGTAACATCCTGTTTTGANCAGTATGTACTTAGTTTTAAGCTTGTTAGGCAGAAATCTACAGAAGTTGGGCAGCTGGTTCGACACCCACTGAGCCTGCCAGAAACCAGGTTWAAGATAAGGAAGACTATCAACATCCTCACAAGAGACTCCAGACCAGGATGTTGATCCTTATCAGGAACTCACACTTGCACAGCCAGAAGGGTGCATTCTATGCATGAGGAATTGGCTGTCACAGTTGCGACATACCTCCACCTTAAAAGAAGAGAGTGGAACCTTATTCGATGCGTGCTGTTGTGGAGCAGGAGKCTCCCAGCCGCCCAGCGCGCTGCTTTTGCTTATTTTACCCGCAATAAAATTTCTTATACYTAAACTCTCGATTGGCNTGGAGAGTGTTTWTAACAA
>cAur-unknown_23#UNK/UNK
TDTTGTGGTGGGTTAACACCCTTTTCTGAGAACAAAAGAACAAAGCAGGGTGGAGGGCTTGCAGGTACTTTTCACTCCCTGCAGGGCATTTTTCGCCTGGGAAGCTGAGTCTGTTCCACTCCCCCCTCCCTGCCCAGCTAGGGTATAAAAAGCAGGACATCGTAGCTGTTGGCCCCTGCTTTTCTGGCTTCTGCCTCTGCTGGATGAGAGCTACTGCAGCTGCCCTCCTGCTCCTCTGCCACGTGGTCGGACCTGATCCTTNTCCCTGCTGCCTCCACGCTTCCTCAGAGAAAGGCTGGTTTTGTATTATTCTCTTGTTTTTGTCCCCCTCCCATCCATCCTTGTTCCTTGCCCTTGTGAACCTTTTTCCTGTTATTGTTATANATATATATATATATTGCTTAAAGACAACTCTTTACCTCTCTACTTCCAAGCCGACTCCAAATTATTGTTTGGTGGATTTGCTCCTTCCTTTTCTCCCCTCTCTGTTGGGAGGGAGGAGGGGGGGGAGTGGGGGAGAGATTCTCAGCCTTGCCCCCCACCTGAGCTCTTAACTTCCAGTTAAGGCTCAAACCACCACAA
>cAur-unknown_24#UNK/UNK
TGTTATAAATGGGCCACACAAGAAAATTTCCAAGTTTCTTGTGAGAGTTGTTTATTAAAAAAGAAGCGAGCAAGCAGCAGGGAAAAATAAAGAGAGAGAAACAGCGCGCTGGGCCGCAGAGACTTCCCCCCACAGATACCTCCAGTCTCTGCCAAAAAGCAACTTACAAATCCTAACTTTTCTTTATATAGCTACACCATCTACATATGCATGCTTATGCTTAATAGAAGGCAGGGATATGATAATGAGTTCTAGCAACTTCTTGGGCTTCTTGAGCATGCGTCTTCTTTGTGGTAGGGGTCGCAGATGAGGCAGGGGAGGTCTTTCTCCTGTGTTCTTTGCAGAACCACATCTTCTCACACAAGTACAGCTGCAGCACAGGACTTATCTGAGGTAAACATTCTATGGCTCCTGAGAAAGTTGGCATGAGGTTCCTGTCTGAAGCCAAAACAATCTGAGCATTTACCCTCTGTTCTCAAAACAAACCAACTGCCACTACCGCCCCGAATACAGCATTCTGCAACACAAATCACAAACCACTATGGCATTTATAACA
>cAur-unknown_25#UNK/UNK
TACCGCGATTGAGAGATGGAGACAAAGCTTGATGCAAGCAAAGTGTCTACTTTATTGTACAAAGTCTTTTCTTTWTATAGGCTAACAWAATCAGAAGCAACTCGGGATTGGTAATTAGATGTGTCCGTGCGACAGGTACAGATTCGTGATTGGCTGCCGAGAAAATGCCAGGGAGCACACATCCCTTGGCAAGGCTCAGACAGGTGTTAGACAAAAGGCAAACGATCACACATCTCTTATCTAAGTTCAGAGAGWAGACAAAAGACTCTANTGCAATGTTTACCAGCTCTAATTCTCAGGTCKTTGTGTGGCTTCCCTGAGTCACAATGGTCGTTGGTAATTAGCTAAATACTTTTTTCTCTTTACACAGCTGCAGTTTGCTCCCAATGTTTGTGGCCTACAAGAGCTAAAACATTTCCTTCTATCAGCTGAGCATTGCTTGAGGTTCTACTCCCTAAATTCATTCCATCACKGTA
>cAur-unknown_26#UNK/UNK
TCCCTAGTGCAGGTAACTCCTCTNCCCTTTTCTCCAGCCCCACAGAAGGCCTGACACATGTCTGCTCAGCCATGATGGCTCTTTCTCTTCTMCCCAGGTCCTTCTGCAGGGAGCACCACCCACAGCAGCAAGTGGAGNTGGTTCCAGAGGAGGACACCACCTGCCTCTTCTGCACGGAGCCTGTGGACAACCAAACGTCCTACAGGACCATGGTGTGCCCGGCGTGCCAGCACGCATGGTTCCACCGGGAATGCATCCAGGTAGGAGCCCATCCCTGGCTCCCAGGAGAGCACAGCTGCTCAGCAGCACCAGGACCTACCTCACGCTCCTCTCCTTCCCCTGCAGGAACAAGCTCTGCAGGCTGGCCTGCTGAGCTTCCAGTGCCCAGCATGTAGGGATCAGAATGCATTCCTGCCTGAAATGCTCAACATGGGCATCCGAGTCCCTTTCAGGTTGGTCTCCTGCCATCCACCTGCCAAGGCAGGAAGGTGCAAGCACTGTGCTAGCCCAGGCNNNCCCTGCACTCCTGGCTCCCTGCTCTCCTGGGAGGCCGTGCTTCAGCTTCACGSAGGAGCTGGAGCCAGGGCAGGGCANKGGCAGGCTGAGCAAGGATGGCCTGCATCTGCCTTAGGCCAGGGGGCAGCAGGGACTCCTCAATRTTCCTTTCTCCCCCAGACTGCCATCCTGGCTAGTCCAAGAGAATGTAGAAGAACTTGGGGAGAGGCACAGGCGCTGTGATGCCAGCCAGTGCCTGTGCCCAGGAGGCAGGGAGCGGCAGAGCAAGAAGGGTAAGTTGTCGAAGCTGCAACCTGGGGCTCTGCACAGGATCCCTCTCTGGCCAAGGGCTCAGAGCACAAGCTCTAGGAACAGGAGCACTGCCAGATGCTCCAGTGCTGCCCTCAGTCTGTCCCCACAGCCMTGAACCCATTTCCTTSCCCAGGCCCTGGCAACTGCTGTTATGCAGCTCCTGTGCTGCTGAGGGCACCCACAGGCAATGCTCCCATCTGAGGCCCAGCACCGACAGCTGGGAGTGCAGCAGCTGTGCTGGCCCCAGCAGAGGTAAGAGGCAAAGCACTCAGCTGCTCCCCACCGCGGGCTGGGGTGCTGGCAGTGGTGCCCAGGCTGGGCTTGGCAGAGGCTCTCTGCTCGGGGAGGGCYGGGGGCACTGCACAGGCCTATGCTGCCAGACAGCTGGAGGCTGTGGCCTTGACCTTTCTGCTTTCCATTACAGACTCCAGTGACAGCTGGGAGCTTCCTGACCCAGGTGCCCCTAACCAGGTGGCAGGGGCAGCATCCTCCAGCAGCTTGGAGGAAGTGGAGAGTGGCAGCAGCCCTGGGCCTGTGAGGGTGCAAGATGAGCCCTGCCTGCAGCCTCTGCAGCAAGCTGCTCCCCACAGCCTCTCCAGAAGACGCTTGGAGGGACGTCGCAGGGCTGCATCGAATATTCCTTCTGAGGCCCTGCCCTCCAGCCAGATGCTGCTTGTGCCATCCCACAGCTCAAGGCTTCCTGAGACCAGCAGCCCCAGGGGCCCCACAGAGACACCATCGGCAGAGCAGGGCAGCTCCCCAGTGCATGAGACCGGCAGGCAGGCCAGCAGCCATCGTCGGCGCAGCAGGAARCGAGGTGGCTCCCACCTGCAGCGTCAGGATGRAGCTCCTCCTTGCAGGCGGCCCCGAACCCGCCGGGGCAGAGCCTGCASGGCAAGAGCAGACAGCCAGAGCAGCACCTGCAGACAGGGGCAGCTGGAGCCCTCCTGCAGCTCAGTGCAGCYGCAGAGCAGCAGCCCAAGGACCACCAGAGAGAGAGCATCAGGGCAGCAGGGCAGCTCCCCAGCGCTTGAGCCTGCCAGNCAGTCCAGCAGCCCTGGGCCTGTGCAGGCGCGCGCTAGGTCCCGCCTGCAGCGGCGAGANGAAGCTGCTCCCTACAGCCNACCCCCAGCCAGGAGCCTCCGCAGAAGGAACAACCCTGCAGCATCCCCAAGTGCTGGCCCTGATCCCCCTGCACCACCTCCCCAGWGAAGGGGMTTTTGACTCTATCTCCACACTGGCAGATCCACTCTCCTTTGCCTCTCCCTCCMTCTCCTCTCCCTTGCTCGGCAGCAGCACTAGGAGCTGGGCCCAGGGCCTGCCAGCACCTTGCCCNCACCTGCTCCTTGCNGGCTGCCCTTGCCCAGCTGCCCAGCACCATGGACATGGACTGAGTGCTTTSGTCCTTGCTGGCCCCACGGCCTTCTCCAGAATCGGGGATGCCTGCTGCTTTGCCCCACCCTGGGAGGTGCCCAGCATGGCCCAGTCAGTGCTGCTGTGCCTCTGCCTTCACTGCAGCCTTTGTGTGAGGGACCCTGCCTGCCGCCATACCGCGTCCCGGCCTGGAGAGGAACCGATGCTGCGCAGAGAGGGGCCGCAAGCAACAGCCCAGCCCTGCCAGGAGCCACGGGAAAAGGAATTCACAGAGCACCCCTGAGAGCTCTGATCCCTCACTGGGGGACTGGTTCCAGCAATTGCTGTCCCTGGGAGTGCCAGAGCACCTCACAAGACGTTGTGCCAGCAGGAGAAGGCTTCAGGTTGCTGTGTCCCTGCAGAAGGTGGTCCTTGGGGTCCCTTTCAAACCTGACAATTCTGGGATTCTRCACTTACAGNAGGACTTAAACAAACNTCTTACACAAACARAGTTACCAAAGGACTTSAATCATTGACTGNAAAAAAATAAACCAACCCACAACCAAACAACAAACARCAAATCTTCTCTGAATGCCTTNNTTCTGCTCCAGTCCCCACAGCTCTGATGAAGCTGGAGGCAAAGGCAGGGGTGTGGCTGTTGGCCCAAGGAGCAGNCCCTGGCCCAGCACAGCTGAGGCCTTCCTGAGGGG
>cAur-unknown_27#UNK/UNK
AATCATAAGCAGGACATGTGTGTAACATCCTTGTCTTGGAATGACTCTCAGCATGATTGGAACTCASTMAGATCACACTTACAMGGGGCCTTYRAAAGCTCCTTGAAATAYAATGTCCAAACATTGRAGCATCAGCTGGAACTGCAGCTAGCAAATGTACAACAGGTGAGGATTGATTCAACATGGCAAGCACTGAACAAAGAGCTGAGCTGGYTGAATCCACACAATTGGTTCTCAGGTCTGAATCTACGAGTGTGGGTTATRGGTGGAGTCCTTGTGGTGATTGGCATTGCAATTGTAGTGTTAATGRTATTTGTAATAACAGCTTTTAGGARCAGGAGGATGGTCAGGACACAAGTGATGGCTGCTGGTTTAAACAATATAAAAATGGGGAAAGCAGAAAGTATCTGTGGAAGGTTTCAGGACAAGAAAGAACAACAGGCCACTGATACTGGAAGGATGGCCTGGTGATAAAGAAGAGCTGACCGTGGTAAACAACCTGAAGTGCGAGACAGGAGGACACTTGCCTCCATGCTGGAGAAGATCAACCTGATATGGGATGAAGATAACAGTGGACAGCTGCATATCAAAGGAGGAAACTCAATGAGCAGCAGTGGTGCAAGAATGTCAGGGAATTGCTTACCCAGCTCGATTTTTCCTGTATAAACTGCTTGTTCTGTACCAATAAATGATTCCTGCTCCACCAACAAGGGAGTCCGTGCAGGCTTTCTGACAAAAAATTGCTCAGCTAATACCATTTGAGTCCTGAGTGCCTAAAACTTCTAAAGGGATTTGAGGATGAGAAGGGTTTGGTTCCACCAGTATGCCTAATACCTCATTGGCCCTAGAATTCCAAAAGGGAAAACTAGAACAGATTGTAACTATCAGACACCCTTGTGGGCAAACTATACAACTTTCAATGATTGTGGATACTGGAGACAATGTCACTATTCTACCTCGCCATAAATGGAATGGTCTCTAGCCATTGCTGATGGCAAACTCTGGAGTCACTGGTTTAACAGGTATGCAAACAACCTGGGTCAGCAAAGAGCCAGTGCAATTAGCTTTTGCAGAAGACAAATCAATCACTAAGACCGTACGTGTTAACCCTTCCAGTTGCTCTATTGGGCTGAGATGCCTTAAGCTAGCTAGGAGCAAAACTCGTGACTGTTCTTTTTCTGTAGCGGCTACTGGTCAGCAACCAACCCTCACATTAAAATGGAAAACAGCTAATCCAGTATGGGTGGAGCAGTGGTCGCTCAGACAAGATAGGCTGCAAGTTGTTAAGACCCTACTGCAGAAACAATTGCAACTAGGGCACACCTTGCTAGCCACTCCTTACCCCTTCCAACGCCCNCCNCNCNNCCCCCCCCCCCNCTCCCTCCCCCTTTTCTGGTACAACTCTGTTCTACCAAAGCTCTGCTCTGATTTAAAGCAACAGTGCTAATTTCATCATTTCTGATTGTAATTTCTTTCAGAGTTCTGTTATTTAGAGTTTTGCTAAGTCTTCCTAGTAAGCATAACAAATAGCAAGCATTTGGTATGTACAAGTACTTAGTAATGAGTTCACATTGTAAGATTTTCTTTTGGTTCGACCCTTCTTAGCTGTGTGCCTCGGCATTGCAAAGGAGCTCCGTGTAATATAGTTAAGGTTAGTAGTAAATAGGTATTCATTCTTAAAAGTATTCCTTAGCTAATGTAACATCTTTCTATTTCATTCTTAGACATTGACTAGAAAATATACAAATAATTAAAAAAAAAARAAAAAAGAAAACAAGTACAAAAGAAAGTTTAAAAATACAAATATATATAACAAAACAAACCACTGCAACTTAAATACAAAAAGTACAAAAAACTTAGATACAAAAAATAGAGTACAAAACAACAAAATAATAATAAAAAATAATAGAAAACAAAAATTTAAAATAAAAACAATTTAACAAGATAATAATAAACAAAAACAGCAATAAAAAATAACAACAAACTAAAAAATCATAAGGATTAGTAACAAAAAATAGCTATTAGCAAAAAACATAAGGATTACTAGCAAAAATAACAATAAGGATTAGATTAAAACAAACAAAAAACCCTATAAAGAAAAATTCAAGAAAATTAAAATGAAAAATAATAATAAAAAATAATTGATAGAAAAGAAGGTTAAAAAATAATTTTAAAAAAGCAAAAATCAAAATTAAAATAGAAAATAGGTTAAATAAAACAAGCAAAAAAATTAATTAAAATAAACAATATAAGATTAAAAAATAGAAGATAAAAAATTAGATAAAAATAAACAAATKAATTGGAATAKAAAACTAAAATNAAAAAAANNAAAAATTTGATTACAATAAAAATTAAAATAAAAATTAAAAAATTGCAATAACAAAATAAAAATAATAAAATTTAAAAGTTAAAAAANAAWAACAAAAAACTAAATTGTAAATAATAACAATATTAAAAGAAAATACAAAAATAACAAAAAAATTAGAAAAACAAAATATATTAAAATTAACAAAAAATTATTAAAAAGTATAGGTAAAAAAACATACGAAAAAGATACATTAAAACGGTGTAAAAAATAAAACAAAAATGAATTAAAAAATTAACAAAATACAATAAGAACTAGATTAAAAATAAAAAATATTGAAAACATATATGCAAAAATAATTAATACAAAGTAAAATAAAAAATAAAACACCCAAAATTAGAATAAAAAGCAAAATTAAATTAATTAAAAATAAAATAAAAAAT
>cAur-unknown_28#UNK/UNK
GTNGGGCTGATGGGCTAAGGTCNGCTACAGAAAGNTTAATNAGGCAAGCACTGGCTCCCCACAGGAGCCCAAGCCCGGCCCCGAGATCCCCCTCAGCCCCAGGGGTTCCTGATCCCAGCCACAGCTTTCCCCNGAGACTCCCAAAGGATTCAGATCACAGCCCTCAGCCCCARGGGATSCCAACCCCAAGCCCTCCCGCTGCCCCCTGCCCCAAACACCAGCCCTGCCAGACCCCACAGATGCCCTCCCCACAGCCTCCCCACACCAACCCCCACAGCTCCTCCCTCTGCCCCTCCAGARGCTGCCCCCAGCCCCACCCACCCCAACCCCCCGAACCCTSCCACAGCCCCACGGAGCCCCCTGCCCCCCACGCCCCTCCCGACCCCCAACTCCRCACACGCCCCCGGCAGCCCCACGCAGCCAGACCCTTCCCCGCTCCGCTGCCGCCGCCCTCAGCGCTCCCCGGCCCCCGCAGCCCCTCCCGCCCCGCCGCAGCTCAGCAGCCGGCAGCTGCCGCTCGCCCGCCAGCACCTCCGGCACTGCTCCCGCGCTCCGGCCCCGCTGCCGCTCCCCACGGGGCAGCAACAATGGCGGCCGCGGCCGGCAGCGGCAGCKCCTCGCTGTGCCTCGGCAGCGGCCAGGGGSAGGGCTGCCGCGCTCYGGGCGCCTCTSATTGGCTGCGGCTGCCCGGGCGTGGGCGGGACTTCCTCTCCGCACTGCGAGCTGCTTCCGCTCCCCGTCACACGNGGCCGCAGCAGCCGGCGGGGCCGGGCCGGGGTCTCCCTCCCGGCGCTCTCTGCTCGCCAGCAGCCTGCCGGGGCCGGCGGCTCCCTGTGCGCTGAGCTCTTCCTCCTCCTTCTSCTGCTCTGCTTCCCCCTTGTCCCNGGGTCCAGGTGGGGTGAGGGAGTCTCTGGGGCTGAGTTGGGGGTCGTGGGGNGGGGATCAGGGAATGCTSTCTGGGGGGCTGCGAGGSGTCGGGAGGGTYSCTTGGGTTGGGGAAGGGTTTGTGGGGNNGGGGTCGGTGGGGCTGGGGGVKGAGCCTCTGCGGGGATCBAGGGGGAATCNGTGGGGTTTGGGGGGWGKGTGCGGGGGG
>cAur-unknown_29#UNK/UNK
GTGTCCTGNTGTATGGTCAGCAGNAASATAGTKCTCAGTGGWATTAWTRATACTGGAGCAGACNTCACAGTRATTTCTARAGCTAAATGGYCCCYGCSCTGGCCTGTAGCTAGTSCATCTCNGGTGCTGKCAGGCAYARGARGAGCTGGAGAAAGTCATCAGAGCCTGGATTTCATTCWGATTCAGGGACCAGAGGGANATAKYTTCTGTGAAACCCTTTGTTTTACCTGTGCCTAAGGTGCTATGGGGTCATGATGTGCTTTCACAATGGGGGGTGACCATGAACASCCATTTTTAGAGGGGGCCATTGCSGYGCGCGACACCCNTCAGTTAACNTGGAAASCAAATGCCCCTGTCTGGGTGGSTCAKTGGCSCCTGCCATTGGAAAAGCTTCACGCACNTCAAGACTGGTCACAGAGCAATTGGGAAAAGGGCNTATTGTACCCTCCACAAGTCCTYRKAATTCTCCTAYTTTTGTCATYAAAANACAAACAGGCAAGTGGCGCTTGCTCCATGATCTCAGAAAGATTAATGACGTTATGRASGAYATGGGRAGCCTTCAATCAGGGCTACCCTCACCCACAATSATACCACA
>cAur-unknown_30#UNK/UNK
CAGGGATTGAGCTGCTTGCTGCCACRTCAGGCATAGGCACAGVCCAGGCAGGCACCATCAGGGMATCAGCTGTGGTGTTTCCCTTGGACACAMACCCTGGCAGCMCTGTGTGGCTATGAACATGCAGCACATGGAATGGTTCTGTTTGACTTTGCAGCACAAGCCATAGGGCTTTTAGCAAATGAAGCAAAGATTTGTTGTTAACCTCCTTCAGCAGTGCCTGGTCCAACCGCTGTACAAGGTTACAAACACACAGTGAGTCAGTGACAACGGTTATGGGCTCGTTGGGCCACTTAGTAAAGGTCATTACCACAGCTTTTAACTCCAGGAGCTGAGGTGAACCATCCTGAGAGGCTAGGAGCTCCTGCCATTTCCCCTTTTCTTGCCAGGCAGCGACTGCCTTCCCTGTTTCCCCTGAACCATCAGTAGAGATTGTCTTTCCTGGGACTGGTGTCACAGAGAACCAAGTCGGTTCCACTCGTTGCAGCCCTCCAGGTAGCTGCAAAAATCGATGTGCCTAGCATGCAGCAAAACCTTCCCTGGGGAATCTGTCAGGGCCATTGGCAACTCAGGGCTGTGTGCCATACACCAGTCCAGATAKTCTGACGTTAAAGGCAATGTCAGAGTGGCAGGGTCTGGTCCTAAGAGTTGAGTACACCATTGCCTGGCTTTGCACACAACCCCAGCAACCAGCTCCATTTGAGTGCTCACTGTTTGCTTTGGGGGAAATGGTAAAAAGACCCAATCCAGAAAATGCAAAGGATGTGGCCAGTGTCCATTCCATTGTGCTGTGAGAGCTGGAGGATGCCCTTGGGAGATAAGCACAGAAATGCTGACAGGTGCTGCTTCTGCTACCCGATGGGCTTGTTCCCATGGCCATGGCGAGCTCCACTTGCTGCAGTGCAGGTTGTGCTTTTGCAGCCAAGCCTCGAGGAGATAAAAGGTCAGGGTCTCCCTTCAGTGAGTCAAATAAGGGAGCTGGCAGGGTTGTGCTAAGACCTAGCAAGGGTCTTACCCAGTTTATGGTTCCAGTAATTTCTGCAAATCATGAAGGGTGGTCACAGATTGCTGAATTTGTATCACTTGTGGCTGCATTGCTTGAGCTAAGATTTTTAGTCCCAAATATTTCCAAGGTGCTTGGTGCTGCACCTTCTCTGGGGCTATTTCTAACCCTTATTTCCTCAATGCTTCTGTCACATCAGGCACAACTGCACTCAGCATGGCCTCTGTCCGTGTAGCAATTAGCACATCATCCATATCTGGTAGCAATACCTGGTGGGATATTTATYGTGTCCTTACCTGTGRTAAMGCCTGTGCCACATACCACTGACAAACAGCAGGGCTGTTTTTCATGCCCTGGGGCAACACAGCCCACTGATACCTTGTCCTGAAGGGACAAAAAGCCTCAAAAATGCTCTGGATCAGACAATGGAGCAGGAGCCAGCAGGGCTGGTTTGGCAGGAAATTGCCCACGTTGCCCAGGCTTGTCTGACCATGTCCTGGGGTCCAAGTGGGCCAGGTGTGTGTGCCTGTGGCCACGTTTGGAGAGAACTCATTCTACAGGTTACAGTGTCAGGTTTTTATCTCTCAATCTCTGTTGTCACTGGCCAGCATTGTCTTGGGAAATCTATAAACACCAACCCAAAGAGCCAGCACCTTGCCCACACCCAGGAAGCTGGAACCCAGAAGCAGCAACTGGAACNGAACAGGAAGCCTCCCRTGTTGCAATCTGAACTTCAAGCCCCGTCAGACTTTGCTGCAGTCAGCACTTTCACTTTCTGAAGCTGGCATGGCTGCAGCATGGTCTCAATAAAAGCAGCAGGTTCAACTCAATCCAGCACAACCCCTCAGTGTACTCCTGGGGCAGKGAAATGYTGGGAAAGCAGAGCCTGGAGGCTTGTTCAGCAGTAGCCAAACCACTGCTGTGGTATCAGCTCCAGCACTGCAAANCACAGCACTAGAAAGATGCTCTGAGGAGAATTAACTCCAGCTCAGCCAAACCCAATRCAMCTCTTCAAGCTCCTAAAAATTCCTTAACACTCAAAAAAATCTCTTCCCACTCCTGGGTGGGTGGAAAGCTTGAGGGAAGGTCCAGGTCAGCAGGAATCCAYCAGGAACACTGCTGAGCTAGGGAGAAGGCTTGTGGAAGCCCCAGGCCTGCTGGAAAGCAGCAGAGCTCCTTAGTGGGAAGCTGACAGAAGCTTTCTGAGTGCTTCCAAAGACCWCCCTGAGATYCCCNCTRNACCCTCCATAGATTCTGAAAGTCAATCCTGGAACCCTCCAGCCCYTCTAATCAAATGAATATTTTATATCCTTTACTATTGAATCTCTTGGGCAGTGGTATCTTCAAACACYGCCCTGGCTGATTGACAAAGTACATTCACAGGTTCTGGCATTGGGCTGTGGGTATTACATTCCACATCTCAAGACAGTTCAATGACTTCAGCACAGACCTAAGAGGTTCCAACGCAGCAATTCCAGTTGGAAAGGAAGGTTCTGTGGTTTGACACAGAGGGSATTCTGTGGCAGGTTAGCCAGGGACTCATGACTTGCTCCTCTGTCYKGTACCTGNCCWGATGCTGTGGCTATAATYTGAGCAGTCCTTGGCTAGGAGAGGGCTAGGGGCCTCTCTCCTCTNNNGNCCANTTNANNGTCTGGAGCTTGCCTTTGNCTCAGAGAGGGCTAGGGGCCTCTCTCTTGTGTGCTCTGTTGCSAGGCTGTAGCCTCTTCTGGGATTCAATTCTCTTGGAGCTTTTCCCCTTTCTGCCTTGGTCCAGGTGCAAGGCCTGGGTGTAGTTGCTGCCTGTTGNTGCAGGCTCTTCAGCTGCAACTCTGGCAGCATTTGGCTCTTGTTGCTGTCTGGGTGAGAACAAGGCAAGTTGTCTAACTTCCTKRCTGGTTTAAAYACTRTSCCAAGRCAATTMATTCCCTTTGGTAACACAGAACCCTGATAACTGCACCTATAGGATGGGGCATGGCCAGGGGCACACACASAGTTCACAGCTGTCTGGGCTAGGGCATGTTTTGGGNTTTGACCCTTCAGGACACCCTCCACACCTTGACATCCCCCCAGTGAAACTGCTCTGAGATACCCCTGAGACTGCCCCTAGCAAGACACCCTCCAGACTCTTCTGAGAACCTCACTTTGACCTCCCTGANCTGGGCACACAGCNCCANNCCATTCCCAGNGAACAAATGTCTAAANTAAAAGCAAACAGACAGGATTTGGTGAGTTTGGTATTTTTATTGACACAACTGGGCAANGGACAGAGAGTTTTTCATCCCAGGGAGACAAAAAGAWAGGGGGAAGAACCAGACAAACCCTGACAAAGCTGAGCCNNGCAGCTCCAGCTGAGCTGACTCATCACTGTAATYGTTCTCATCAGCACTAATTGGTGTTCAAAAGGGCAGGAGGTGTTTGTTCCTGCCNGAGCCCCAGCCTCTAAGAAATGCAGGTGAANAAGAGGTGATTTTGGTTCAAATTGCTGGAAAGGCCCTTTCAGGGGCTCATGATTACCCCAACAGACCCTNGGTGGGTTTATTTNGCCTGCCCCRCACTGTGGGCTGGTCAGCAGTGTGGCTGCGGCGATGCCTGGTGAGGTTGGAGCTGCTGCTGAAGCTCTTGCTGCAGNCAGGGCAGGTGAAAGACTTCTCACTGGTGTGGCTGCGGCNGTGGTAARTGAGACTGCTCCGACNGGTGAAGCTCTTNCCGCAGTCAGCACAGGTGAAAGCCTTCTCTCTGCTGTGCACATGACGATGCTGGGCGAGATGGGAACTACGGCTGAAGCGCTTGCCGCAGTCGGCNCAGCTGTACGGCTTGTCACCGCTGTGCCTGAGCTGGTGGTTGATGAATTGAGTGCTCGTGGTGAAGCTCTTGCCACACGCAGCACAGGGGANCAGCTTCTCNCCGGTGTGGMTGCGGCGGTGGATGGTGAGGCTGGAGCTGTGCTTGAAAGTTTTGCCGCAGTCCCTGCAGGTGAAGGACTTASTGSTGTGSNNRNTGCGGTGYTGGGTGAGGGCAGAGCTSTGMGTGAAMCTCTTRCCGCAGTCGGCACAGSTGTASGGTTTGTCACCRCTGTGAGTGAGKYGGTGCNNGNTGNANNAGTGCNSGKGRTGAAGCTCTKGCCRCACTCAGCACAGGGGAAGANWTKCTCTCCAGTGTGGCTGCGGCGGTGGMTGGTGAGGCTGSAGCTSYGSTTGAAAGTTTTGCCGCAGTCNCYRCAGGTGAAGGACTKCTMRCTGGTGTGGCTGAGGYGGTGCTGGCTAAGNTGAGCCCTCTSCCCGAACCGCTTG
>cAur-unknown_31#UNK/UNK
CCAGGCTGGGCCTGCANTGAGTGACATCAGAACTGCTCTGCAGGRGAMGACAAAGAGTTTATTGCTTCTGAAAGCATCCAGRGATCAGTTNGCTCAGGGCAGCCTTNAGCTCCTGGTTCCTCAGGCTGTAGATGAGAGGGTTNACTGCTGGAGGCACCACTGAGTACAGAACTGACACCACCAGRTCCAGGGATGGGGAKGAGATGGAGGAGGGCTTCAGGTWRGCAAAGAAGYCAGTGNTGANAAANAGNGAGACCACAGCCAGGTGAGGGAGGCAGGTGGCAAAGGCTTTGTGGCGTCCCTGCTGAGAGGGGATCCTCAGCACTGCCCTGAAGATCTGCACATAGGACACCACAATCAACACAAAACAKACAAATGCYAAACAGNCACTGRYCACAAGWAGCCAAAGTTCCCTGAGGTAGGATGTGGAGCAGGAGAGCTTGAGGATCTGGGGNANTTCACAGAAGAACTGNTCCACAGCATTGCCCTGGCAGAGGGGCAGGGAAAATGTATTGGCTGTGTGCAGCAGAGCATWGAGAVCCCCACAGGCCCAGRCAGCTGCTGCCAKGTGGAGACAAACTCTGCTGCCCAGGAGGGTCTCATAGTGCAGGGGTCTGCAGATGGCAACGTAGCGATCGTAGGACATGNTGGTGAGGAGARAATACTCTGCTGVVATYAADAA
>cAur-unknown_32#UNK/UNK
CTCGCGGGGCTCCCGCTCGGCAGCAGCCCTCGGTACAGCGCCGGGACTGGCAGCCGCTTGGGGGGCTTSCACGGCTTCTCCTCTTCGCGCTACGGGATCGGCTGGGAACGCGGCGTTCCCTGCACAAGCTGCGAGGCTCGGAGCGGCCCTGAATTCACGTGCGCGCGGCTCGTGAGCCCAGCGCCTTCGGCGGCGGRATTTGAACAGAGGCAGCGCGGCTCGCGGGGCTCCCGCTCGGCAGCAGCCCTCGGTACAGCGCCGGGACTGGCAGCCGCTTGGGGGGCTTCCACGGCTTCTCCTCTTCGCGCTACGGGATCGGCTGGGAACGCGGCGTTCCCTGCACAAGCTGCGAGGCTCGGAGCGGCCCTGAATTCACGTGCGCGCGGCTCGTGAGCCCAGCGCCTTCGGCGGCGGGATTTGAACAGAGGCAGCGCGGCTCGCGGGGCTCCCGCTCGGCAGCAGCCCTCGGTACAGCGCCGGGACTGGCAGCCGCTTGGGGGGCTTCCACGGCTTCTCCTCTTCGCGCTACGGGATCGGCTGGGAACGCGGCGTTCCCTGCACAAGCTGCGAGGCTCGGAGCGGCCCTGAATTCACGTGCGCGCGGCTCGTGAGCCCAGCGCCTTCGGCGGCGGGATTTGAACAGAGGCAGCGCGGCTCGCGGGGCTCCCGCTCGGCAGCAGCCVYCTTCTCTGGTATTCTCTGGTACTSGCGCGCGCCGCCGCACTTTTTCTAAATTTKYTTTTTGTYKGTTTGGGRT
>cAur-unknown_33#UNK/UNK
GATGTATCTGTGTCSCTGTATAGGGGTCGGGGTAAGGATAAGGTGATGGTCTGTGCGACAAGAATCAAACACAAGCAGAGCACATAGAAGGCCAMAAGGCAAGCGSMGTTTATTCCAGCACACAACTCATATATTGTGTGTAGTGTTAGTGTGGCTGCCTGWAATTGGTTAATGAACTTTTCTCAAGAMTCTCATGGGTCAGCRATAGCATTGCTAKAGTTACTTGTTAAGTTAGTCCAGGTGGCCTCCCATCT
>cAur-unknown_34#UNK/UNK
GTCTTCGCTGCTCTSCTCACBGTCACTTAGCTGCACNTCCTTCACGAYCAYACTRAAAKAMAACCAGAAGACAGGCATCAGCYWRGGCAGSCACAATTTCRGGCCGCAGACCTTGACAAAGAATYGGTGTATGCTGTCCACAAAACCAGCCYCCCANNNCATCCTCTTTGACCATTCCTYACACGCTGGCTGCTAACCCCTCTCGTTACCTGATTGAAACAGAAAATGCCAAAGACAACCCAGGGCTGCCTGGGCACTTCCCAGTTGGTCTCCACACGCTTTSCAATGAGCTCACTACCACAACCTATAACCACCCAAGACCACAAGAGCAGTGCTCCTCTGCCAGGGTTSCCHAGGACACCAAGCTACCCAACCAGGGTGACCTGGAAACAAACACAACCAATCAAGTTTAAGAGAGCATACTKACCACACCCATCANGGTTAANATCNNTNNTCCTAGCACACYAACAAAGCCAATCASCCTTAACCTACCACACCAACACAGCCAATCAATCTTAACCTAGCACACCAACACAGCCAATCAAGGTTAGCAACRGGTTAGGGAAATATGGTGCGATGGAAGCTCTAAGAATCATCGACTGCAGTTGTGTTTCCCTTACATGCAAGAGAACAGCAGATGAAAACATCTGCCAGATCTTCTTTTCAATCTGACTTTACTCTGGGTAATTAAAAAATGGCCTCTCTCACCTCAGATGCTGCCCAATGCATAGAAGAATTTTGCAAATACTCAGCTTCACTTCAAGAGCAAAGAACAACACTAACACCTTAAAAGGATCATACGTCTGCAAGGGCANCAAAGACAGATTYCCCCNAACCAGTTTTCAACTCATTGGGAAATAGCTCCTGTTTAAGGAAAAACAATCAGCTTGAATCATTGGCCAAGGCTCTAGAAGGTAGAGGGCCCCAACAGGCCTGGTTAATATGCAAACATCACGGATCCTGACCTGATTCAGAGCCAAGGAATGGCCCCTAATACATCCTTATCCTTCCCACTCCCAAAGCCACAACAGGGCTACAANGGGAGCTCAGCTTCAGTGAGAAAGAGGGAGGAAACAACTCCACAATTCAAGCTCTATCACTATTACCACAGCTGAAAAMCCCTTCACACAGCTACATGTCAGTNCCAACCTCTTAGCTGCAAGTAGCCAAGAGCACAGCAAAACTCTCTGCACAGATCCAGTTTGCTCATATGGTCTGCTCAAGGAACCTCAATGCTCCAGACCAGTCCAAGCCAGCAACTCCCCTCCAAGCCACAAGCAAGAACTGAACGCAGYAGCCCATGACTGACACACGAGCCTCTTCTCTCGGAGCAAKGCCCTCTTGACGTCACATGAAGATGTGCTCTTGGAAGYCCTGGCTCCAGCAAAGGCCTGGCCAAAATGCTGGCAATGCACTGCTCTGAGATTATGGGGTCCTNAGTTTCAGCAGATCTGACAGAAGCACTTCAGCCAAGCCTGGAAGTGTTGGAAGACAGCTTGGATGAGGCCTTGAGNAAGNTGGNCTAGCNGGAGGGNTCCCCCTGCCTATGGCAGCATCTTTACAACTTGATCATCTTCAGGGTCCCTTCCAACCCAAACCATTCTCTCATCCTTTCCTCTAGCAAATGCTAAATACTGAAGCAGCTGNGGNNCACACAGCATCAGCATGAACTCCTRACCTTCCCTTTCATCAGGCACTGATYCAGTAAGAAAACACCAATGATCACTAGGTSAAAATTGATGGACATCCAGTCACTTGGTTCAATACCCACTGCAGAGAACTAAAGGCAATTTTCCAGAACAGCTACAGGCAGCTACAAACTAAAGACTGCTGCAAGAGAGAAACTAGCAGCCCTTACTCACCCACCCCACATACAGAAAATATTTTGGGTTTCCTCCTGATTTGGTCCAAACAGAATTTTGGGAACAAACCTGTGGCTTGGAGCAGCAAGCAATGTTGGTGGCTTAT
>cAur-unknown_35#UNK/UNK
GAGGCCCCGAACSGGCCACGTTGCAGCCCKGCGGGGGSGGGGTCTCGGTCSGGAGRGGAAGTCCCGSCCATGCCYGGGCAGCTGCAGCCAATGAGAGGCGCCSRGAGYGSGGCAGCNCCTGYCCCTGGCCGCGGCCGAGGCACAGSGAGGAGCTGCCGCTGCYGGCCGCGGCCGCCATTGTTGCTGCCYNGNGGGGRGCGGCAGCGGGGCCGGAGCGCGGGAGGAGTGCCGGAGGTGCTGGCGGGCGAGCGGCAGCTGCCGGCTGCTGAGCTGCGGCGGGGSGGGAGKGGGCTGCGGGGGCCGGGGAGCGCTGRGGGCGGCGGCAGCGGAGCGGGGAWGGGTCTGGCTGCGTGGGGCTGCTGGGGGCGTGRGTGGKGGTGGGGGTCGTGRGGKGYGGNKGGGGGCAGGGGCCTCCGTGGGGSTGGGGGAGGGTTCGTGGGGTTGGRGRMTTTGTGCTGGGMGCTGGCSGGSGGCWGCTGTGYKGCAGSGCAGCGGSGGGSCGSGGGGYYAGNGKGGGGAAGCTSTGGGCAGGCTGTGTGCTGGGTKSYGCAGGGTGWGCWTTGGGGCRSCWGGGGNNGGKGKGGGCTGTGGGGGGGYTGGGMGGGGCTGGGGGKGRTGGGATCCCTTGGGGCTGCAAGTTTC
>CR1-E_VSP-cAur_a#LINE/CR1
TGGCCGCACCCAAAGAKTGGCTGTYAATRKGTCCATGTCCCAGTGGAGRCCAGTGACAARMRGAGTCCCTCWGKGATCAGTYMTGGGACCAGTYTTRTTCAACATCYTTKTSRRTGACATGGACAGTGGCATTGAGTGCAYCCTCAGCAAGTTTGCTGATGACACCAAGCTGTGTGGTGCAGCAGACACGCTGGAGGGAAGGGATGCCATCCAGAGGGACCTTGACAGGCTGGAGAGGTGGGCACAAGCCAACCTCATGAGCTTCAACAAGACCAAGTGCAGGGTCCTGCATCTGGGTCGAGGCAATCCCAGGCACAAATACAGGCTGGGCAGTGACTGGCTGGGGAGCAGCCCAGAGGAGAGAGACTTGGGGGTGCTGGTGGACGAGAAGCTCAACATGAGCTCTCAATGTGCACTTGCAGCCCGGAAAGCCAATCAGATCCTGGGCTGCATCAGGAGAAGTGTGGCCAGCAGGTCAAGGGAGGTGATTCTCCCCCTCTACTCAGCTCTGGTGAGACCCCACCTGGAGTACTGCSTCCAGTTCTGGAGCCCCTATTACAAGAGGGATCTGGAGGTGCTGGAAGGTGTCCAGAGAAGGGCCACGAGGATGATCAGAGGGCTGGAGCACCTCTCCTATGAGGACAGACTGAAGGAGTTGGGGCTGTTCAGTCTGGAGAAGAGAAGGCTCCGAGGTGACCTCATTGTGGCCTTCCAGTATCTGAAGGGGGCCTACAAGAAGGCTGGGGAGGGACTTTTCAGGCTATCAGGGAGTGATAGGACTAGGGGGAATGGAATGAAGCTGGAGGTGGGGAGATTCAGGCTGGATGTGAGGAGGAAGTTCTTCACCGTGAGGGTGGTGAAGCCCTGGAATGGGTTGTCGAGGGAGGTGGTTGAGGCCCCGTCCCTGGAGGTGTTTAAGACCAGGCTGGATGAGGCTCTGGCCAGCCTGATCTAGTGTAGGGTGTCCCTGCCCATGGCAGGGGGGTTGGAACTAGATGATCCTTGTGGTCCCTTCCAACCCTAACTGAAACTATGAAACTATGAAACT
>CR1-E_VSP-cAur_b#LINE/CR1
CACCARAGWGCARCAGAAAGAGRGAAAWAGAACCTCAGGAAAGTCTTGCTCASTGTTGCTCTSTGAAATGCAGACAGGCCTTAGGCCTGGTCCTTGRAATGGGAGCTTAGGAGAATACAGAGGCKTAGGGCCTGCTCTTGAAGGTGACATTTGCCCCAGCTCTTCCCAGAGAGMTCCTTGCTGTCCCCTGTTCTGCTCCCTGAAGCAGACCAGCACTCACACATGCCCTGCACTAMAACAGCCATGCAAACAAAGGGGAACAAGCTCAGGGTTAGTGCTCCAACCAACTKCTWGAGACTGAAGCCCAAGGCAGGAATCCACAACCATAGCCAGGCCCAGAGCTCTGAGAAGCCCCAGCTGGTGTCTTCCTTTTGCACTTCATGCAGAGTCTGCTTGGNTCCCATANCTCACTGRTCAKAGAATGGGCTGSGCTGGAAGGGACCTCCAAAGGTTATCTTGTCCAACCTTCCCAGGGATAKCCTCAACTAGATCAGGTTGCNCAYAGCCCTGWCAARCCTCACNTTCAATATCTCCAGGGATGGGACCCCAACNNCTSCCTGGGCAACCTGTTCCAGTGTTCCACTACCCTCCTGGTGCAGAACTTGWGCTGGCTCCTCCTTCCTGCACAATCCTGCTCTGTTCCCATCTCTCACCCATGTCTATGGATGTCCTTCCTCTCTGATCCAGGGAAACACAACAGCTTGTGGTCAGTGCTGTGCCCACTCCTCCTTCTGAGGCAAAGGCCATGCCTRGAGCCATTCCCTCCTRAGCAGCTCTTTCTGCAACCTGTTTCSCTCCTCCCTGGGAAGCTGATCCTGCACCTGCAGTCCTGTTCCAGAGGACTGGGAGAGCAGAGATCTTCACCATGGCCTTTYCTGCTTCACTTTCTCCTGAGCAAGGCAGAAAGCATCAGGCAAAGCTGTGCCAAGCAGAGGCCCTTTCCTTTGCAGCAWTGTTTCATTTGRGCCATTTCACATCTCCTTGGACCCAACTTGGAGTCTCTCACTGATCAGCCACAGTTGTATTTGGGAGCACTGCCCCAGGGGCACAGATTCCTGACCAGCTGAGGGCTAATCTTTCCCTGCCTTTACTGCCACATCTCCAAGACTTTCCCTTKCCTCCTRGTGCTGCSCACCCTGTGTGTTTGTTCCYTATTATGGGATGGTGAGAGCCTGGCTGGATGCACACCCTGAGTGTTTTTCCCWCAGAGGSGRCTTGACTTCAGGCAGTCAATGTTTGCTGATCAGTTAGGTTGCATCTCAGGACACYTTTGGAATYTCTCTTCTTTGGATCAGGAGCCTCTTCCATCCCCATCCTGTGCTTCTAKTTCTGGATTATCCTTAAGGGAAGTGTTCATCCCCAAGATCAACAGGAGCCACCASTGTGCACTTGCAGCCCAGAGAGCCAATTGTATCCTGGGCTGCAGCAAGAGRAATGTGGCCAGCAGGGCCAGGGAGGTGATTCTCCCACTCTGCTCCACCSTGGTGRGACCNNAYCTGGAGCNCTGTGTCCAGTTCTGGAGYATCTKTTACAAGAAGGATCTGGAGGGGCTGSAAGGTGTCCAGAGAA
>CR1-E_VSP-cAur_c#LINE/CR1
TCATAGTWTCATAGTWTCAGTCAGGGTTGGAAGGGACCACAAGGATCATCTAGTTCCAACCCCCCTGCCATGGGCAGGGACACCCYACACTAGATCAGGCTGGCCAGAGCCTCATCCAGCCTGGTCTTAAACACCTCCAGGGACGGGGCCTCAACCACCTCCCTGGACAACCCATTCCAGGGCTTCACCACTCTCACGGTGAAGAACTTCCTCCTCACATCCAGCCTGAATCTCCCCACCTCCAGCTTCATTCCATTCCCCCTAGTCCTATCACTMCCTGATAGCCTGAAAAGTCCCTCCCCAGCCTTCTTGTAGGCCCCCTTCAGATACTGGAAGGCCACAATGAGGTCACCTCGGAGCCTTCTCTTCTCCAGACTGAACAGCCCCAACTCCTTCAGTCTGTCCTCATAGGAGAGGTGCTCCAGCCCTCTGATCATCCTCGTGGCCCTTCTCTGGACACSTTCCAGCACCTCCAGATCCCTCTTGTAATAGGGGCTCCAGAACTGGAYGCAGTACTCCAGGTGGGGTCTCACCAGAGCTGAGTAGAGGGGGAGAATCACCTCCCTTGACCTGCTGGCCACACTTCTCCTGATGCAGCCCAGGATCTGATTGGCTTTCCGGGCTGCAAGTGCACATTGAGAGCTCATGTTGAGCTTCTCGTCCACCAGCACCCCCAAGTCTCTCTCCTCWGGGCTGCTCCCCAGCCAGTCACTGCCCAGCCTGTATTTGTGCCTGGGATTGCCTCGACCCAGATGCAGGACCCTGCACTTGGTCTTGTTGAAGCTCATGAGGTTGGCTTGTGCCCACCTCTCCAGCCTGTCAAGGTCCCTCTGGATGGCATCCCTTCCCTCCAGCGTGTCTGCTGCACCACACAGCTTGGTGTCATCAGCAAACTTGCTGAGGGTGCACTCAATGCCACTGTCCATGTCACCCACAAAGATGTTGAACAAGACTGGTCCCAGGACTGATCCCTGAGGGACTCCGCTTGTCACTGGCCTCCACTGGGACATGGACCCRTTGACAGCCACTCTTTGGGTRCGGCCATCAAGCCAGTTCCTTATCCATCTRGTGGTCCACCCATCAAACCCATGTGTCACCAGCTTGGAGACCAGGATGTGGTGYGGGACAGTGTCAAAGGCTTTGCTCAGGTCCAGGTAAACGACATCAGTTGCTTGCCCCTCATCTATYAAKGYTGTSACCTGTTCATAGAAGGCYACCAGGTTTGTCAGGCAGGATTTGCCCTT
>CR1-E_VSP-cAur_d#LINE/CR1
CTTTGAGCTTCTGGGGTCAGCTGCTGCCAGCACCRTTGTAGGTRGGAGCCAGGCAGAGCCTCACAGCTGCTGAACTAAGCCCTCCCACCCCCTGCAGCCTTCACCCTCCATCTCTCTATCCATTGCTCCAGCTCCACTCACTTGCTGCCCTCTGAGAGTCCCCAGGGCTGATCTACACATCCAGCATGGCCCATGAGAAGGCACTCAATGAGAGCATGGAGAAGAATATCCTGGAGAACAAGTTGGAGGAGCTCAACAGGAGCTGTCAATGTGCACTTGCAGCTCAGGTGGCCAATCAGATCCCAGGTTGCATCAAGAGGAGTGTGGCCAGCAGGTCAAGGGAGGTGATTCTCCCCCTCTACTCAGCTCTGGTGAGACCCCACCTGGAGTACTGCCTCCAGTTCTGGAGCCTCTATTACAAGAGGGATCTGGAGGTGCTGGAAGGTGTCCAGAGAAGGGCCACGAGGATGAKCAGAGGGCTGGAGCACCTCTCCTATGAGGACAGACTGAAGGAGTTGGGGCTGTTCAGTCTGGAGAAGAGAAGGCTCCGAGGTGACCTCATTGGTGCCTTCCAGTATCTGAAGGGGGCCTACANNNNGGCTGGAGGGACTTTTCAGGCTATCAGGNAGTGATAGGANTAGGGGGAATGGAATGAAGCTGGAGGTGGGGAGATGCAGGCTGGACATGAGGAGGAAGTTCTTCCCCATGAGAGTGGTGAAGCCCTGGAATGGGTTGTCCAGGGAGCTGGTTGGGGGCCCATCCCTGGAGGTGTTTAAGACCAGGCTGGATGAGGCTCTGGCCAGCCTGATCTAGTGTGAGGTGTCCCTGCCCATGGCAGGGGGGTTGGAACTAGATGATCCTGGTGGTCCCTTCCAACCCTGACTGATTCTATGATTCTCTTTTCAGGGCTCACACATTTAACATCCATTTGGGTTCTGTTTAAAGTCCCTGCCCTTCAGCCCACGAGACATTGTCACCTGTGGGTTGTAAAGCAGCACCCCAGGTAATGCACTGAGCCATAACTGGTGAGGGAAAATTGGCTCAAGTCTCTTTGAAAGGTTCTTTGAATNGTTTGTGCCTGACACCCAGCCCCACCAGCTGTATTCAGCTGCCAGGTGTCTTGTTGAGTCGCCCCCTAGTGGACAAACCATGACATGCCATCAGCTTTGGGCTGGGAAACAGCAGAGCAGTCTGCTTCTGACCATGCTTCCTGCCAGCACAGCTGACAAAAGCTCTGCACAGCTCTCAGCCTGCAGCCACACAGCAAAAGCTCCTCCTGCCCTGAGCCTTCCTGTGCTCAGCAGGCCTGGAGAGAAACTGAACATCAGTCTGCAGCCCCCCAGGGAACATTTGTGCCTCAAGAGATTGCAGAGCACAGAGGCCTTGGATGCCACCACCCCCAGCACAGCCAAACCCCCCCACAGCTGACACCAGCCCCAGGCGCTCCGAAGCTCAGGCTCAGCACAGCACCCACGCCTGACACCCCCACGGCACCCAGCACACAGCCTGCCCACAGCTCCCCCCCGCGCCTGGCCCTCAGCCCAGCCGCTGCCCTGCAGCACAGCAGCCGCCCGGCAGCTGCCAGCACAAAGCCTCCAACCCCCAGGGCTCCCCCACMCCCCCCACAGCAGCCTCTGCTGCAAGCCACACCCCACGCTCACCACCACCTCTCCTGCACACAGCAGCCCCCACAGCGCCGCCCACAGCTCAGCTCTGCTGCCAGCCCAGCCCCCAGCACAGGGACACAGGGCCAGGGCCAGCCCCTGCAGCCCACCAATGGCTCCGCCTGCAACACAGCAGCAGCCAAAGGGGGCCTGCAGCTGCCCCCAGCAGGGGGAGTCAGCAGGACAGGACTACAAGGAACCTCCAAACACACCCACCCCGACCCCCCCACCCACGCACCCACAACCCCACACACCCCTCCCACAACACCACACACGACACCCACCCACCCCCTCTGCCCTACCCCACACAGCCCCACAGACACACCCCCCCAACATCACACACCCCCACAGCTCCCCACACACTGCCCACAGACACACACAGCTCCCCACAACCGCACCCACCCCCGCGCAGCACCCCACCACTCCCTTCTCCAAGCCTCACCACCCCGACCCACACTGCAGCCACACACAGCCTCCCCCAGCAACAACTCCAACCACCAAAGTCACACAACTCCACRGGCTCCTTCCCAGCCTCTCAGACGCCTCTCTCGGCCCCCAAGCCCCCAGGGAACCTCACAGACGCCCCCACAACTGCACAGCCCCCACCAACCMCCCCCCACAGCCCCACAGACACCAGCCCCACACCTCACGGATCCCTCCTCAATCCCASCTCCAGGACACAGCCTTCAGCCCCAGGGCAGCCCAATGCCAACCCCAGGAGCCGCTCCCCCAGGCCCCAAAGAATCCCCACCCCAGCATCCCCCACTCTGGCCCGCGGGTGCCCACACCTACCCCACARCCGAGGCCAAAGGGACGCAGAGCAGGAGAAAGACGAAGGAGGAAGAGCTCGCAGCAGAGGCGGCTGCCGACTGCCGCCCCCTGCAGCCTCCTGGCAGCCTGAGCGAGCAGAGAGCGATGCAGTGGAGGCCCCGAACAGACCACGTTTCAGCCCAGCGGGGGTGGGGTCTCGGTCCGGAACGGAAGTCCCGCTCACGCCCGGGCAGCTGCAGCCAATGAGAGGCGCCGGCAGAGCGGCAGCTCCTCCCCCTGGCCGCTGCCGAGGCACAGCGAGGAGCTGCCACTGCCGGCCGCGGCCGCCATTGTTGCTGCCCCGTGGGGAGCGGCAGCGGGGCCGGAGCGCGGGAGCAGTGCCGGAGGTGCTGGCGGGCGAGCGGCAGCTGCCGGCTGCTGAGCTGCGGCGGGGYGGGAGGGGCTGNGGGGACAGGGAGCGCTGAGGGCGGCGACAGCGGAGCGGGGAAGGGTCTGGCTGCGTGGGGCTGCTGGGGGCGTGTGTGGAGTTGGGGGTCGGGAGGGGCGKGGGGGGCAGGGGSCTGCGTGGGGCTGGGGGAGGGTTCGTGGGGTTGGGGTGGGTGGGGCTGGGGGCAGGCTCTGGAGGGGCAGAAGGAGGAGCTGTGGGGGTTGGTGTGGGGAGGCTGTGGGGAGGGCATCTGTGGGGTGTGGCAGGGTTGGTGTTTGGGGCAGGGGGCAGCGGGAGGGCTGGGGGGAGAGGGGGTGGGGTTGGGATCCCTTGGGGCTGAGGGTTGTGATCTGGATCCTTTGGGAGTCTCGGGGTGTGACCGGTTTAGGCAAGAAACTCTACGTTTCTTGGGGATAGTGGGATTNTGGGGACTGCACATTCCTGGATNCAGTCAGATTGTGAAACCTCTGTATGATGTGACTCGAAAGAGAAACAATTTCCACTGGGGACCTGAACAACAAGCAGCTTTTGACCAGATAAAGCAAGAGGTNGTTCAAGCAATGGGTCTGGGACCTGTCCGAGATGGTCCAGACATTAAGACATTTTGTACACGGCTGCAAGTGACAATGGTCCAACCTGGTGCTTGTGGCAAAGAGCTCCAGGTGAGACACGTGGACGACCTCTTGGTTTNTGGAGTNGAGGTTACAGAGGTTCAGAGGCTMATTATACTCCAACAGAGAAAGAGATTCTAGCTGCCTATGAAGGAGTAAAGCAGCTTCTGAAGNNATTGGAACTGAATCACAACTTCTCNTAGCTCCCAGATTACCAGTTTTGAATTGGATGTTCAAAGGCAAAGGTTCCACACCACATCATGCAACAGAYTCCACCTGGTCTAAGTGGATGGCTCTGATAACACAGAGAGCTCGAATGGGAAATCTTGAAAGACCTGGTCTGGTGGAGGTGATCTCAAGTTGGCCTGAAGGTACCAACTGCACTAAACCTCCAGAGGAGAGAGTAACTCGTGCTGAGGAAGCTCCTCCTTACAATGACCTTTCTGATGANGAAAAGAAATNTGCTTTGTTCACAGACGGTTCCTGTCGNCTNGTNGGGAACAAGCGAAGGTGGAAGTCTGCAGTGTGGAGTCCAACACGCCGAGTTGCAGAGGCAAAGGATGGAGAAGGAGAATCCAGTCAGTTYGCAGAGGTAAAAGCTGTCCAGCTAGCTCTSGACGTAGCTGAACGTGAGAGGTGGCCNAAGCTTTATCTCTACACNGACTCATGGATGGTAGCCAATGCTCTGTGGGGTTGGCTAAAGAACTGGANNANGARTGGTTGGCAGAGAAAAGGAAAGCCNATNTGGGCAGCTGASCTGTGGCAGGACATTGCTGATCGAATCGAGAGAATTCCAGTGAAGGTGAGANACATTGATGCTNACATCCCTAAGAGCAAAGCNNCTGAGGAACAGCAACACAACCATCAGGCAGATCTAGCTGCAAGAGTTTCTCNAGYAGACATGGACTCTGATCTTGATCTCGACTGGAAACACCGAGGTGAGATATTCTTAGCTCGGTGGGCTCACGATTCGTCAGGACATCAAGGCAGAGATGCAACCTACCAGTGGGCACGTGACAGATCCATAGACATTTCCATGGATGCTATCACACAAGTCATCCATGACTGTGACATTTGTGCTGCTATTAAGCAGGCAAAGNGACTTAAGCCCTTATGGTATGGTGACAGATGGTCCAAGTACAAGTATGGTGAAGCTTGGCAGATTGACTACATCACTCTACCACGTTCTCGTTCTGGTAAGCAGTATGTGCTTACTATGGTAGAGGCAAACACTGGATGGTTGGAAACTTATCCAGTTCCACATGCAACTGCACGCAACACCATTCTNGGTCTGGAGA
>CR1-X3_Pass-cAur_a#LINE/CR1
AGCAGCAGCCCCACAGCAGCACAAGTGCCAGCCCAGGAGAGGAGGAGAGAAGGGGCCCCCTGCCCCTGTCTTCTCCAAACTCACCATCCAAGCGGCCAGGTTCTCCTTTGCCACCAGTGGGGATGGGAGGCAGCTGCTGCTCTGTGCCAACCTGCAGGCAATGAGCTGTGCTCACCCAGCAGCCCCACAGCACACAGGGCTCACTGCCAGCTGCATCAGCCCCTGGCCACGTGTGAGAGGTGGCCACAGCTGAGAGAGCACCCCAAGCACTCCTCACCTCTGCCTGGACCGCAATCAGCCTCTCCAGCCTCTTGCTGTGCAGTGTCAGGGGCTGTGCAAAGGGAAAAGAGCAGCAGGTGAGAAGCGATGCAGCTGATGCTGGGCTGCGGCAGCCTCTGGGGACAGAGTGCGGGCAGGAGGGACACTCACAGCTCTCTGGCTGCTCAGCTCTTTCAGCAGCAGCTTGAGGGAGGGCAGCTGGGTGACCTGGGCTCCCTCTGCTCCTTCTGCTGGCCTGTGCCTGGGGAAGGGGTAGAGGAAGAGCTGCGTGAGACACAAGCTGCCTCTTGCTTCTCCTCCCAGCCCTGGCAGCTCTTCCCAGCTGCCCTGAAGCAGGCAGGTACCACCCGCCAGGGGCAGTGGTGAGGGTGGAGCTGGGCAGCTGTTGCTTGGACACAGCTGGCTCAAAGTTCTCCACCAGATCTGCCCACTCAGGAGCTGCTCGCAGCTGGGGTGGCAGCGCTCTGAAGCAGAGGTGCAGTATTGCCCCATGGGACGGCTAGAGCTGCAGCTTCCCCCCATGATGGGAGCGTGGCTGCTCTGCCAGGCACAGCTTACCCACGCAGTGTGCTGACCCAGAGCTCCTTCACTGCCCGTGAGCTGCAGAGAGAGAGGAGAAACAGCCTGAGTGCCCAGGGCTCCCCAGCCTGAGGGCAGAGGCAGGCACTGGCACAGCTCTGCCCTGCGGGGCAGGACAGAGACTCTGCCCAGGGTGCCCTGCCAAGCGACACGGCCCCCGGACTGACCTGAAGGAGATGACACAGGAGCCAGAGGGCCAGACGAGGCCAAGGGACTTGGTGGAACTGTCTTCCTCCCCCTCGGCAGCATAGCCACTCTCGGATGGTTTCCCACCGCTCAGCACCATCAACTGGCCCAGGGCCAGGCAGAGCTGAGGCAGCAGGACGCCGCCCCGTCTGCAGAGAGGAGAACCTGGGAGTGACCTGGAGCTGCCTGAGCCCTGGGGCTCCCCTCTAGAACGCAGCTGCCACGGCTGCAGCCTTGAGCGCGTCCAGCACCGAGGTGCCAAAGCAGGAGCTGCTGCTTGGCTGTGCCTGCCCTGGGGCCGGGGCCAGGGCTTGGGGAGAAAGGCAGCTGGGCTCTCTGGGTCTTACTTGGCCTTGGCGATGAGCAAGGAGTCGGCGAAGAGGAGGAGCTCCCTTGTCTTCCTCGTACGGCCCCGGCTCAGCCGCACACGCTGGCGGAGCAGTGGCTCGGGCAGGTGTGTGTCAGGTGGGCACTGCTGCTCGGGCCAGGGGTCAACCCTACAGAGCAGATGGCACGGGGCATGAGAAAGGGGGCTGCTGTGGGTCCCAGGTGTGCCAACACCTCCCTGAGCCGTGGGGGAAGCGTACCTGGAGCGATGACAGCAGTTTAACTGACCCATCCTGCCGACGCGAGGGCTGAAAGGGCTGGACTCCTGAGAGAGCACAGCTGCCCTGGGGAGGCTGCCAATCCGCTCAGGGTGCTGAGGAGTGGTGCTGGGCAAGAGCTTGGCTCTGCCACTGCCACTCCAGTGCCGTCCCTGCAGGCACTGGGGCCGTTGCCAGGCAACACTTGGTCAACATACCCCAACGGTCGCTCGGGGGGGGANGGRGGGGGGSGGGGGGGCAGGAGGGGCACTGGAGGGGCACTGGAGGGCTCTCCCCAGTATGCCCACGTGTGAGAGACTAAAAGCTTGTCTCTCCTGATGGGACTCAACAGAGAGAACATCAAGGACCGAGGCCACCTGTTCCTGAGGTGCAATGAGTGTGTGGGCAGGTAGATGGAGAAGGAGGAGGTGGAGCCCCCCCCTCCAGCCAGCCCCCTGCCCAAACACACAGGAATACACAGAAAGACTTCCTGGGGAACCATACCTGGATACTTCCCTAAGGATGATTTCCTGGCCCCTGAATTCCTGAGGGACAAGGCTTGGACACATAGCTAAGGACTGAAACACTGTATAAAAGGCTTGAGCAACCACTGGCTCCGCAGAAGAAAAACAGAGAACCCAAAACACAGATGAAGGCAAGCACAGGAGAAGGACAATGCTGCTGAGAAGGACAGCTCCAGAGAAGGCAAAGCCCGGGGCAGTGCTGCTCCGAAGAAAAGAGGCCATGGAGCCTGGAAGAAGCAGACTGAACCCTCTCTCCGTCTCCTAAGTTCCACCTGCTGCAACTCATGGAGCTGAAGAGGCTGCCCAGAGGACCACATCTCTTCTACAGCCCAAGCCTCAGCACCGCTTCTCTACAGACCCAACAGCTCCTGCAGCACCTTTCCTCCACAGGCTCAAACTGTCTTGGGGGGGTGAGGGGGGGGTAATCGAATTCCTTTCCTCTTCTCTCTCTCCCCTTCTGATCCATCCACATTATTTGTGTAATAAATAGTCGAGCTGTTGACATTTTGGCCTCCTTTGTGCCTCTCATTTCACCACAGGGACTATTCAAAAGCACTGAGGCCCTTTCCCCCTCCGGCCCGAGACACCATGTCTCTCTCACCCTGCTCTCAGCAGCACTGAGCAGAGGAGCAGGGTCACCTTCCTTCACTTGCTTTGCCCAGGGCACCACTTGCTGTCCTTGGCCAAGGGCACCTTGCTGGCTCCTGCTGACCCCAGACCCCCAGGGCTTTTGCTGCCACCCTGCTTTCCAGCAGCCTTCCCAAGCTCCTTTTGCTCACCAGTCCGGGGGGGTGTGACCCAGGGTGCTTCATGCCACTGCCACTGCCACCCACACTCAGTTCCACTCTCTCTGCACAGCTTTTCTGGCTGGCACTGGGTTTTGGGTCTTCCCTCCCGTCCTGATGAGCTGCAGGAGGGTTGGGTAGCTTCCAGTCAGCAGGGACCTCCCCACACTCCCAACACCTTGGGCAGATGATCGAGAGGCCTTCTGCCATGACATTTGCCAACTCCTTCAAGACTCTGGGGGTGAATCCCACCAGGCCTCATGGCCTTAGGAACATTCAGTTGATACTTCAACTGCTCCCTTAGCAGCTCACAACTTTGGTGCTGTCAGTAACAAACTCTCCAAGGCACCTTTCATAGCACAGCAATGCTTTGTACTCCTCTGCTCTTGCCTCCTGTGTCAGAAGGCCTGCAGATCCCTGCCACAGCTTTCCCCAGAGCAGCCCTGAAGGGCTGTGCCCAGAGAGCTTAGAAGGCACAACACAAGTTTCCTCCAGCTACTCTGACACCTGGAACACAGAAACCAACACAGTCTAACATGAGGAATCTCACTTTTTCACACATAAACAGCCTTTTATCTATTACCCACTTGCATTCTGTAACAAGCAGGCCTCTGTAGGACATGCATATTTACACACCCAAACTGCCAGTGGAAGACAAGGGGGTTGTACCCCACTGTCATATTTCAGGCCATGGCATTACAGACCATTCCCCACCTTCATTCCACCTCTTCTTCTCTCCCAGTACAACCTCTATAAGTTTACCATGGAGGCTCCTTAGGACTTCAGCTGTTACAATTTATTGCCATTGTTGTTGGGTTTTGTGGAGATCTTGGGGCTCAGAGCCAATTGCTCTTGAGCACTGTCAGGTTAAGGAGTGATACTGCAAGATATTTAACACCTGATGGGCATCTCATCATGCCAGAACCCCAGTCTGCTCAAACAGGGGAAATCTCACAGCTTCCCTGTGACATGCAGCCACACATACACCTATTTTCCAGTGCAGTAAGGCAGGCCCCAGCAACCAGCACTTCAGTAGTGCTCCGTGGCTCCAGCCATATGCTTAGAAATCACAGAGACATTCAGGTTGGAAGAGACCCTCAGGATCACCAAGCCCAACCAMTGACCCTGCTCTACAAGTTCACCCCTAAACCCTATCCCCAAGCACCACCTCCAAACGACCTCTAAACACACCCAGGGTGGGTGACTCCACCACCTCCCTGGGCAGCACACTCTGTAAAGATTGTTTTCCTCATGTCCCCTGTAAAAATCCCACAGCACCTGGGCTCTGGTGGGGTCTCCTCCCACCCCAGGTGGGGACACTTTGCCCTCCCCACCCACTCCCCTAGTTAATCCCCACCAGGAAGGGCAGAAGCCCCAGGCTGAGCCCACCTGGGCTGAGGGATCCTCCTCTCATCGCTGGGGAGTGCCCATGGTGCACCCTGGGTGATGGTGGTGGTGACAACACAGGCTGGGGGGCCTGGTGGCCCCCCGGTTAGGTAGGGCCATGATTGATGGCTCCTCCAATATCATCCACGGGTGCTGGCTGGGGCTCCTTGCTGGGGCTGAGCTCCTCTGTGTGGCATCTCGGCTGGTGAGGGTCCTGCCCCTAGCTCTGGGATGGGTGTAAAAATAGTGGTGGGGGAGCAGGAGATGTTTAGACAGTGA
>CR1-X3_Pass-cAur_b#LINE/CR1
GCCTCAYCGCACAGRAGGACAAGCCKCTGCGGCACRGCAAGGGCCGGGCTGAACCTCAGCATGAYAAGCCCGCCGCGGGCCGCTGGGCCGGCCTCAGGCGCGGGCCGCCCCGTCACAGAAAGCTCCACCCTCCTCTTCCCCTCCGCTTCCTATTGGTCGAGGCGCCCGCCCGTCAGCGGCAGTTGTCCAGCGGACGTCCCCGCCGCGGTGACGTCCTGAGGGAGAGGCGGGGACGCTGCGGGGGCGGGGCCGGAGGGGCTGGGRGGCACCCGGCACCGGCTTTGGCACCMATGYACGGCGCAGAAGAGGTGGCAGCGGCGGCGGCCCGCGGCGAGCACGCAGACCGATAGCTTGGCCGGTGAGCGCTGCCCTTTGCCCGCCGTRGGGGTCTGGCAGCGGCGGGGTCGGCATTTCCTTGGGAATTTGTCCTTTGTACGTAGAGGCGGAGCCCTCCCCGCAGAACCCCGCCGGCACCCACCTTTTCRRGACCCTTCTCACCGGTGCCGTGTTTGGCAGTGCAAGTGAGGATGCGCGCAACAGCCCCGACATTTCCTAGCGGCTGAACTCCTCCCAGGGTTAAGATTTGTTACTGCAGTCCCTCGGCAGGGACTGAGGCTTTTTTCGTAGCAAAATTCAAAGGAGCTCCTCTTTTTGAGAGTCACTTTGTAGCCTATTTGCCATTGCTGTCTCTGGCTGCACCGGAGACAGGTTTTAATGTCCTCTTAATTTTACCTCATAGACTGTACATTCCAAAAGCAAAGAGACNAAAAGCAGGAGGAGACAAAAACAAGAGAGAAAAGCTTTATARAAAGTTTCAACCCCTGTGGGAAATAAAAGTCTTATTCTTMGKCGTGGTTGTTSGCTCCTCTTGGCGCCTCGCCCCGCCTCCGTTGCTCTGCCCTGCGCCGWTGCCGCTCTTCCTGCGYYGGGCGAGYGCTGCGCACGCCTCTCCTCCCCTCGGGGTGCTTYYCTTGGNAGGGGGATGGGGSGTGCCAAGCAGYCCCCTCTTTGCAGCCCCCAGCACAGGGAGGGATGAGGCCAGAGATRCAGTGCGANTCGCGACCGCCCTGCCACCCGCGGCTGTGCCTGGCGCTGCCGCTGTGTNGCCGCTGGTTCCCTTCAGGGTCCTCAGCCTGGGATGCCACTTCTCCAGGGCTGCCCTAACCTGAGACCGCCSCCAGCCTCTGCCTGCCCAGCCTGGCSCTCTCGCACTTGCTTGTGCTCCTGGGGCTGCTCTTCAGTCTCCGCTGCCTCTGCTGCTCCTGGCCTCGCATCTTTTGGCAGCTGCTCTGCCCCCTCTCCAGCAACTACCACAGCAAGGCTGCACCTGCTGCACCATCTGCCACCTAGCACCCTCACAGGGTAGCACCACTTCACCATCAGCTTCCCCCNCATGGCCAGTNTTGGTCTCATCAACATCCCTGGGCCTTCACCTTCCTCCCTACTGCCTCCTTCATTTCTAGAACGAGAACCAMAACNAGAACTGCAACAACTCCAACTGGAACAGCTACAACNNNNNCTNATAACTGGAACCTTAAYGAACAGCAACTAGAANCTTAACAACAAGMACCTGAGCARCNCMGAACCTTARYAACCAACRAGRAYTRGARCCTYAACARNACAANAACCTTAACTACTAGAACYYMAGCNWWCARCYAKMACCTTAACAAGAACTAAAACCTTAACAAAYAACWCCAAGAACCTTAATAACAACTAGAACCTTAACAGCAACTTGAACCTTAGCAAATRACAWCTAGAACGTTRKCAACTARAACCTTAACAGCAACAAGAACCTTAGCAAMCAACAARAACCTYAACWRCWMCKMSARCSTKWRCRGCYAGAACCTTAGCAAACANGNANCTNNNCNNCNNNNNCCTTNNNNANCNNCAAGNNCAANTANNACCNANNNANCNNAGCNRMCYACCTNNNCAANTCTTAACAACTGCTCTAACTTGAACAACCANTNTAACTCTAATGCAGCAACAAGAGCTCTGACACCTATAGCAATAACTCATAACTAAAAATACCAGGCTAGAGACRAACAACTATTTGGAGCTCAGAAGAACGTCCCACATGCTGCTCAAGTACACAGGAACAAAGTCCACYTGACATGTCTGCAGGCATCTCTTCAAGCTGCCCNNNGNNNTGGKAAKWAAAAAAATGACAAGGGTGAGGGGAGGACAAGCAGCTTGTGCTTTGGTGTGAGAGCCAGAGCCCATTCCTAGTACTCCTCTGCAGAATCCCTTCTAGCCNNNNNNAGGGATTGGTCCTGTCAGACTAACANTTTAGACTGTGGAACTTGAGGGAGCCTTTTGACTNCAAGGGCTTTTGCCTNNAGTGCTGTACAAAGCCAGAGCCAGGCTGGGATCCAGCTGCACCAAGAATGGAGGAGAACGCTGAACCACAGTAAAAGCATCTCTCTCCTGACACACCTGTTCTCCCAGGGGCTGGCATCTCTCTCCTGACACACCTGTTCTCCCAGGGGCTGGCATCTCTCTCCTGACACACCTGTTCTCCCAGGGGCTGGCATCTCTCTCCTGACACACCTGTTCTCCCAGGGGCAGGCACATGCTTCCTCTCAGGGGCAATCTCTGGGCACCTCACAAATGTTTCCTCTCCCCACAGCAGATTTCAAAGGGGACAGCAGGGAGTGTTACACAGCTGGCCTCCTTCTTCTTCTGCTCTCCCTGACCCTGCTCAGTTGCTCACCTGGAGATCTCTTTCCAGCTTTTGCCTTTTGTTCTCGGGCTGGCTGTCCCTCTCCTCTTTACAGCTCAGCTTTCTCTTCCTGCAGGAGCGCTGCTGCATGTCCCCAGAAGCTTTGGACAACCTTTCCATTCAANAGCATTGTTAGACAGGGAAGGCCATCATCCCCTTGCAGCAGTTCTGCTCTTAAGCAAAGCCAACTCATTTTACCTTCTGGGCTCAGATGAGCTCTTTGGCTCTTGGCTTGCTTCAGCCTCTGGAAGCACCTGCAATGGAAACGGGGAAGTGAAGAGGCAGCAAGGACCTCCCTGCCCACTTGCTAGCTCACAGCTCAAAGACACATCCCATCAGCCTTTGCTGCACTTCTGCCCAGCTGCAGCTTGGAGAATGACCTTGCTTGCCCTCTGCCTGCACTCCCACCTTCTGAGGGGGAGCTTTTGTCCTCATGTTCTTGGTGCCCTTCACGTACCTCTCCAGATTCTCCTTCTCCTGGCCCCACTGCTGCCACCTCCTCGGCCTCTGCAGCCACAGGCTTAGTCACCTCCTCCTCCTCCTCTTCAAAGAGTTCCCCCTGATGGTCGATGAGGAACTCCACCAGCTCTATCACCTGCAGACAGAGAGCCATTGGTTCCTACTTAGGTGCCTGCAGCTGGCTCCAACAGCCTTCCCCACTCCCAGCCCTGCTTTCTGCACACAAAACTGCAGCTCTGGGGCTGCTCTTCCTGGCACCTCTGCCACATGGCTTTGCTGAAGAGAGGAGGCAGCCAGGTCCCTCTCAAGAGCACAGCTCTGCTGGCCCCACGAGGCTGCAGCTGGCAAGCACAGCATACCTTCTCTGTCACCAGCATGTCCGGGGGCAGCGTCTGCTCCTCGGCTGGGCTCAGGAGGTTTGGCCCCACGCAAATGGCCAGGTTGGTAGCAGTCATGCTGCTGGAGGCTGCATTGCTGCTGATGTGGTGCAGCAGGGACAGCAAGCGCTTCAGGAGGAGGAGGTTGGCCTGGGGCAATTTGCTGGCCACCCTGAAGCAAGAGGAACACAAGGTTACTCCACTAGACCTGCTCGACACAGGTCTCCCAGCCTGACCTCACCCAGGCCCACACGCAGGGGAGGCTCCCTAGCCAAAGCCTCCCTAGCAAAGCCTCCCCAGCAAAGCCCAGGACCCATCTTCACTGCCAGCTGCCTCCCTCCCTGCCCCTCTGCCCACAGGCCCTTGCTGGAGCACCCCCCGATGTCTGCAGCAATTGCTCCAAGGACAGCAATGCTTTGCTGTGCCTCTGACACCAACCCCCCACCCGACAGCAGCTAGAGGTGGCTGGCAGAAAAGAGCTCTCCCAAGGAGGCCCTTGCTCTGCAGGCAGCTCCTAACCTCTAGCAGGCCCTGAGGAGCAGCCAGCCTGCTCGCCACACTTACTCTTTCAGCCCGCACAGCCTCTCCTGCCTGCTGCTCTTCTCCAGGGCACTCATCCACTCCCCGTACAGCTCTGACTGGAGGAGCTTGGAGGGGATCTTCCGCAGGAAGTCCTGCAAGGCCAAGAGCTGCGGGTGAGCTGGCAGCACTGCTGCTGCCAGGAGCACAGGCAGTGTGCCCGGCACTCTGCCTCCCCAGCAGCCAGCTGCCTTTCAGCTCCTGCTCTCACAGGTGCCCCTCAGCACCAGCAGAGCCCACAGCTGCAGGGCAGCAGGCTGTACCTTCAAGACGGCAGCCAGCAGGTGCACAGGCTGGCTCTCCAGCTGGACCTCCGCTCCCCTGTCCAGCGCCTCCCGCACCTCCTGCAAGCTGCGCTCGCCAGCTGTGCGGCAGAAGATCTTCTCCGTGGATGGCCCTTGGGCGTGCAGCAGAGCCAGCAGGTCCTGCAGGGGACAGAGCAAACCAGCTGCTCGCCTGAAGAATGGCCATGGGGCCCGTGAACCTTCCTCAGGGGCTAGAGCCAGTGTGCCCCTCTCCAAAGCCCTCCCTGGGGCCTGGCGGAGGGCTGGCTGGAGGCTGCTGGGGAGAGGGGGAGCCGGCTTTGTCCCCAAGCCACACCCGGGCTCCCTGCGCTGGGGCCATCACCTCTGCACAGCAGCTGCTGGGCTGGGGACCCCCTGGCCAGGCTTGCTTACCTGGACGGGCTGAGGTAGCGTGCCATCCTGGCTGCACACAGCTGCCAGGGGCTGGGCAAAGAGAGGCCCTGGGTCGCCACAGCCCCATGGCCTGGGAGCTTCTGCAGTGGCAGCCGAGGTCTGTCGCCGAGAAAAGGGCCAGGGCAGCCCCATCCTCCTCCTGCGCCTCCCACCTGCTGCCAGGCAAAAGGGAGAGAGGGGAGAGGTGGAGGACAAGCACCAAGCAAGTGCTCCTGGACCTTCTCAGCACTCTCCCCCAGCCACCAGGGAAGCCCACCCATTGTTGGCAACAGGGGACCCTGGGGGCTCAGCTGGCTCCCACCCAAGAGCGTGGGGACAGAGCCGCTGCCCTGCAAGAAGGGCGGCAGCAGCAGCAGCAGCAGCCCCACAGCAGCACAAGTGCCAGCCCAGGAGAGGAGGAGAGAAGGGGCCNCCTGCCCCTGTCTTCTCCAAACTCACCATCCAAGCGGCCAGGTTCTCCTTTGCCACCAGTGGGGATGGGAGGCAGCTGCTGCTCTGTGCCAACCTGCAGGCAATGAGCTGTGCTCACCCAGCAGCCCCACAGCACACAGGGCTCACTGCCAGCTGCATCAGCCCCTGGCCACGTGTGAGAGGTGGCCACAGCTGAGAGAGCACCCCAAGCACTCCTCACCTCTGCCTGGACCGCAATCAGCCTCTCCAGCCTCTTGCTGTGCAGTGTCAGGGGCTGTGCAAAGGGAAAAGAGCAGCAGGTGAGAAGCGATGCAGCTGATGCTGGGCTGCGGCAGCCTCTGGGGACAGAGTGCGGGCAGGAGGGACACTCACAGCTCTCTGGCTGCTCAGCTCTTTCAGCAGCAGCTTGAGGGAGGGCAGCTGGGTGACCTGGGCTCCCTCTGCTCCTTCTGCTGGCCTGTGCCTGGGGAAGGGGTAGAGGAAGAGCTGCGTGAGACACAAGCTGCCTCTTGCTTCTCCTCCCAGCCCTGGCAGCTCTTCCCAGCTGCCCTGAAGCAGGCAGGTACCACCCGCCAGGGGCAGTGGTGAGGGTGGAGCTGGGCAGCTGTTGCTTGGACACAGCTGGCTCAAAGTTCTCCACCAGATCTGCCCACTCAGGAGCTGCTCGCAGCTGGGGTGGCAGCGCTCTGAAGCAGAGGTGCAGTATTGCCCCATGGGACGGCTAGAGCTGCAGCTNCCCCCCATGATGGGAGCGTGGCTGCTCTGCCAGGCACAGCTTACCCACGCAGTGTGCTGACCCAGAGCTCCTTCACTGCCCGTGAGCTGCAGAGAGAGAGGAGAAACAGCCTGAGTGCCCAGGGCTCCCCAGCCTGAGGGCAGAGGCAGGCACTGGCACAGCTCTGCCCTGCGGGGCAGGACAGAGACTCTGCCCAGGGTGCCCTGCCAAGCGACACGGCCCCCGGACTGACCTGAAGGAGATGACACAGGAGCCAGAGGGCCAGACGAGGCCAAGGGACTTGGTGGAACTGTCTTCCTCCCCCTCGGCAGCATAGCCACTCTCGGATGGTTTCCCACCGCTCAGCACCATCAACTGGCCCAGGGCCAGGCAGAGCTGAGGCAGCAGGACGCCGCCCCGTCTGCAGAGAGGAGAACCTGGGAGTGACCTGGAGCTGCCTGAGCCCTGGGGCTCCCCTCTAGAACGCAGCTGCCACGGCTGCAGCCTTGAGCGCGTCCAGCACCGAGGTGCCAAAGCAGGAGCTGCTGCTTGGCTGTGCCTGCCCTGGGGCCGGGGCCAGGGCTTGGGGAGAAAGGCAGCTGGGCTCTCTGGGTCTTACTTGGCCTTGGCGATGAGCAAGGAGTCGGCGAAGAGGAGGAGCTCCCTTGTCTTCCTCGTACGGCCCCGGCTCAGCCGCACACGCTGGCGGAGCAGTGGCTCGGGCAGGTGTGTGTCAGGTGGGCACTGCTGCTCGGGCCAGGGGTCAACCCTACAGAGCAGATGGCACGGGGCATGAGNAAGGGGGCTGCTGTGGGTCCCAGGTGTGCCAACACCTCCCTGAGCCGTGGGGGAAGCGTACCTGGAGCGATGACAGCAGTTTAACTGACCCATCCTGCCGACGCGAGGGCTGAAAGGGCTGGACTCCTGAGAGAGCACAGCTGCCCTGGGGAGGCTGCCAATCCGCTCAGGGTGCTGAGGAGTGGTGCTGGGCAAGAGCTTGGCTCTGCCACTGCCACTCCAGTGCCGTCCCTGCAGGCACTGGGGCCGTTGCCAGGCAACACTTGGTCAACATACCCCAACGGTCGCNCGGGGGGGGNNNNGGGGGNGGGGGGGCAGGAGGGGCACTGGGGGGCACTGGAGGGCTCTCCCCAGTATGCCCACGTGTGAGAGACTAAAAGCTTGTCTCTCCTGATGGGACTCAACAGAGAGAACATCAAGGACCGAGGCCACCTGTTCCTGAGGTGCAATGAGTGTGTGGGCAGGTAGATGGAGAAGGAGGAGGTGGAGCCCCCCCTCCAGCCAGCCCCCTGCCCAAACACACAGGAATACACAGAAAGACTTCCTGGGGAACCATACCTGGATACTTCCCTAAGGATGATTTCCTGGCCCCTGAATTCCTGAGGGACAAGGCTTGGACACATAGCTAAGGACTGAAACACTGTATAAAAGGCTTGAGCAACCACTGGCTCCGCAGAAGNAAAACAGAGAACCCAAAACACAGATGAAGGCAAGCACAGGAGAAGGACAATGCTGCTGAGAAGGACAGCTCCAGAGAAGGCAAAGCCCNGGGCAGTGCTGCTCCGAAGAAAAGAGGCCATGGAGCCTGGAAGAAGCAGACTGAACCCTCTCTCCGTCTCCTAAGTTCCACCTGCTGCAACTCATGGAGCTGAAGAGGCTGCCCAGAGGACCACATCTCTTCTACAGCCCAAGCCTCAGCACCGCTTCTCTACAGACCCAACAGCTCCTGCAGCACCTTTCCTCCACAGGCTCAAACTGTCTTGGGGGNNNNANGGGGGGGNNNNNNNNTNNNNNNTCTCTNCCCTTCTGATCCATCCACATTATTTGTGTAATAAATAGTCGAGCTGTTGACATTTTGGCCTCCTTTGTGCCTCTCATTTCACCACAGGGACTATTCAAAAGCACTGAGGCCCTTTCCCCCTCCGGCCCGAGACACCATGTCTCTCTCACCCTGCTCTCAGCAGCACTGAGCAGAGGAGCAGGGTCACCTTCCTTCACTTGCTTTGCCCAGGGCACCACTTGCTGTCCTTGGCCAAGGGCACCTTGCTGGCTCCTGCTGACCCCAGACCCCCAGGGCTTTTGCTGCCACCCTGCTTTCCAGCAGCCTTCCCAAGCTCCTTTTGCTCACCAGTCCGGGGGGGTGTGACCCAGGGTGCTTCATGCCACTGCCACTGCCACCCACACTCAGTTCCACTCTCTCTGCACAGCTTTTCTGGCTGGCACTGGGTTTTGGGTCTTCCCTCCCGTCCTGATGAGCTGCAGGAGGGTTGGGTAGCTTCCAGTCAGCAGGGACCTCCCCACACTCCCARCACCTTGGGCAGATGATCGAGAGGCCTTCTGCCATGACATTTGCCAACTCCTTCAAGACTCTGGGGGTGAATCCCACCAGGCCTCATGGCCTTAGGAACATTCAGTTGATACTTCAACTGCTCCCTTAGCAGCTCACAACTTTGGTGCTGTCAGTAACAAACTCTCCAAGGCACCTTTCATAGCACAGCAATGCTTTGTACTCCTCTGCTCTTGCCTCCTGTGTCAGAAGGCCTGCAGATCCCTGCCACAGCTTTCCCCAGAGCAGCCCTGAAGGGCTGTGCCCAGAGAGCTTAGAAGGCACAACACAAGTTTCCTCCAGCTACTCTGACACCTGGAACACAGAAACCAACACAGTCTAACATGAGGAATCTCACTTTTTCACACATAAACAGCCTTTTATCTATTACCCACTTGCATTCTGTAACAAGCAGGCCTCTGTAGGACATGCATATTTACACACCCAAACTGCCAGTGGAAGACAAGGGGGTTGTACCCCACTGTCATATTTCAGGCCATGGCATTACAGACCATTCCCCACCTTCATTYCACCTCTTCTTCTCTCCCAGTACAACCTCTATAAGTTTACCATGGAGGCTCCTTAGGACTTCAGCTGTTACAATTTATTGCCATTGTTGTTGGGTTTTGTGGAGATCTTGGGGCTCAGAGCCAATTGCTCTTGAGCACTGTCAGGTTAAGGAGTGATACTGCAAGATATTTAACACCTGATGGGCATCTCATCATGCCAGAACCCCAGTCTGCTCAAACAGGGGAAATCTCACAGCTTCCCTGTGACATGCAGCCACACATACACCTATTTTCCAGTGCAGTAAGGCAGGCCCCAGCAACCAGCACTTCAGTAGTGCTCCGTGGCTCCAGCCATAT
>CR1-Y_Pass-cAur#LINE/CR1
CATCCTCACTGGYCCTGAAGGTCATTGCCACGAGGGCCAACCCTGTCCTGGGACCAGCCCTACCNGCCCTGCCAGGCCRACCCCRCAGGACTGCTCCCTGCTGTCCGGAGGGAGCYRCCTGAGTCCTGCWAAGGGAGCCTGCCTACHGGCTAGCCTACGTTCCATCCCCTCTCHRCTGCCAYGGGAGGGAGAAGGTTGCCTCCACYATYSCYATCCAGACCAGCCCAGGAGCCAGCCCYGGYGACAGCAGCCTGCTGGAACCTAACCTTGCTACAAACAAAGGACACAGTGAATCTTCCACCTGCTTCCCACTCACTGATGYTCAGTTCAAAGCACCTGTGCCTAGCAGCACATTTCTACTTCNAGCCTCTGATGCATTGTAATACCTCTGTATAKAGTTAAGCAGCTGCCAGCGTCTCATCGAGTCGCCACCTGGTGGACAAGCGGTGGAATTGCAGCCTGAGTTATATKAATAGAAATTAATTCTGCAAATATTCTAATTGAGTCCAAATTATCAATACTGAACCACTTCTGGGATGTATTTCACAGTCGTGCACTAGAATATGGATATAAAATAGTGACTCATTGGTTATTGATAATTTTAATAATTAATACAAATTAATATTTATATAACTCATATTTCATATTCATAAATTAATAACCTCTTCATCACACCAAGAAATTTAATCTCTTGTCCTGGACCTTGACATTTGGAAGGTGGAATGTCCAACCCACTCTTGGTGGGCTCATAGGAAGGGAAGTGTCTCCCTCTCTCCCTGCCCAGCCCCCTGCAGTGGGGGAGTCTTACTGGGGTCTGCATTGAAAATACCACACCTCACAATACAGACTGGGCCCCTCCCATCCTCTCTACTCAGTCCCCTGCTCTAACACAGTGGAGCTGAACCCCTCCTGCACCTCACCCCATACAGCTCATCCCCTCCCAAACACACCCCTCACCCTGACTCTGCCCCCATTGCTCATCTTGGCCCCAGCCTTTACCCTTTGTTAAGCATTGGTCCTTTGACCTTAACCCCAGCCTCAACCTAGCCCCAACACAACCCCTGCCCCTCAGAGCTGGCCCTCACCTGAGCCCTGCCCAGCACTCTCAGCAGGACAGCTGAAGGAAGGAGACTCATTAACTCCTCACTAACTGTTAGAAACTTTCCCACTCATTAGAGTAGCCTTCAGCCATCAATAAAGGAACCATTGAGCTTGGTAGAGTGAAGGGACATAAGGCAGCAGACCACAGCCCCAGACATCAAAGAGAGAGGTAAGGCTGAGTCTGGAAAACAGGATGGGGTCTCACACACCTGGGCCTCAGTAACAAGATGAGAACAGTCCTGTGGGATTGGCAGAAGACCAACAGGAAAAATACAAGAGGATGACACAGTGACTACAATGTTGACACAAGGACAGCAGATGGCAGCAAAGAGCAAGGAATGGAAGGATTTTAGCTCTTCAAAGAAGTTTTTATCATTCTAATGCATCTGTATTACTAATACTATATGAGGCATATGGTTAACCTTGTTCAGCACTGTTATCAATTATTAATATTTATTCAAATATATTAATACAAATATATTAATTCTTTAATAATATAAAAATAATTTAAATCAATGTATTAATATCAAATCTCATCAATGTGTATAAATATCTGAGGGGTGGGTGTCAAGTGGAGGGGGCCAATCTAAGGTAAGAAGCAACAGGTTCAAGCTTGAACAGAGAAGATTTCACCTCAACATGAGGAGCAACTTCTCTGCAGTGCAGGTGACAGAGCACTAGAACAGGCTGCCCAGAGAGCTTGTGGAGTTTCCTTCTCTGGAGACTTTCAAACCCACCTGGGTACACTCCTGTGTGGACTACCCTAAGTGATCCTGCTTTGGCAGGGGGGTCAGACCTGATGGTCTCTTGAGGTCCCTTCCAACCTCTAATGTGATACTGTGATACCACCCACACAGGTACAGCTGTTTGGTTGTGGTTAATGTATTTCACAACATGCACATTCAATACAACTTTAACAGTTGAATCAAGCTAGAATCTTTTAAACATTGATTCAGCTTAGGAAAGAGCTAATGCCTCAAGGGCAGTTTACCTGCAAGGGGAATCTATGGCTGCTACAGAGGCGGCTGGCACAGAGCTGTACAAAGAGACTTGATAGGAATCAGCCTTTGTGCTCAGGGCACTGCYRCCTGGGACCTTTTTGGACACTGCAATTATGCTCCAAAGCACAGAGTGCAGCCTGCACAAGTGAAACAAAGCAARAAAKATGGTGTTCAGMARAGGAGCTGTGCAGAGTGTGWGTGTGGAGGGGAGAAGCAGTCTCCCCCTGGAGAGGAATTGTTGGGGCTGAGGGAGCKGCTTKTGGCTCAKGGGCTCGCAGGGCAGCTTGCTGGCCAGGCAAGYAGTTGACAGTTCTNCAGTGCTCAGGGTGGGATGAGCGGTTCTCATTYATCTCACCACAACTCCAGCAGCTTGCACCAGCACCTCAGGTGTCACAGGTGGAGCAAAGCAACTTTCTGGCTGCAGACTCAGGCAGCAGGCATGCAGAGGCTGCTYTCCAGTCCAGCAGCATTCACCAGCTGCAGCTACAGCRTGTTCCAGKTTCATGTGGACAAAATAGGCTCTGGGGAACC
>CR1L-cAur#LINE/CR1
CCTGGAGGTGTTCAAAACCAGCACTGGACGTGGTGKTTGAAGCCATGGTTTAGTTAGTCCTGAGGTGTGGGGTGACAGTTGGACTGGGTGATCTCTGAGGTTATTTTCCAACCTTACTGATTCTACGATTCTGTGAAAGAAGACAATTTTTGCCACGCGCTTGACCCAGGTACCTCAGCAGATCCGTTTAGCAGGGCAGCACAAGAGAGGTGATCCCAAGAAACAGCAAAGCCACATGCTTTGCAAGCCGGCTAAGGAAGCAACTTCCGTAGTGTGGAGCAGGACGCTGGCCCGGCCCCGGCGTGCCCCTCTGAGCCCTTTTTTTGCCCACAGCCTTGGATTTTCCCCGGGAGGCCAGCGAGGGCCAGGCCGGGGATGAATGCAGCCCCGACGCTGCTCCTCAGCGGGCAGGTGGTCAGCACAAMAGCAGCCCCCRCGGSYSSTCYCASRKWAGGRCAGCAMGGGCCGGGCTGAACCTCAGCATGAKAAGCCCGCCGCGGGCCGCTGGGCCGGCCTCAGGCGCGGGCCGCCCCGTCACAGAAAGCTCCACCCTCCTCTTCCCCTCCGCTTCCTATTGGTCGAGGCGCCCGCCCGTCAGCGGCAGTTGTCCAGCGGACGTCCCCGCCGCGGTGACGTCCTGAGGGAGAGGCGGGGACGCTGCGGGGGCGGGGCCGGAGGGGCTNGGNGGCACCCGGCACCGGCTTTGGCACCSATGCACGGCGCAGAAGAGGTGGCAGCGGCGGCGGCNCCGCGGCGAGCACGCAGACCGATAGCTTGGCCGGTGAGCGCTGCCCTTTGCCCGCCGTGGGGGTCTGGCAGCGGCGGGGTCGGCATTTCCTTGGGAATTTGTCCTTTGTACGTAGAGGCGGAGCCCTCCCCGCAGAACYCCGCCGGCACCCACCTTTTCNNGACCCTTCTCACCGGTGCCGTGTTTGGCAGTGCAAGTGAGGATGCGCGCAACAGCCCCGACATTTCCTAGCGGCTGAACTCCTCCCAGGGTTAAGATTTGTTACTGCAGTCCCTCGGCAGGGACTGAGGCTTTTTTCGTAGCAAAATTCAAAGGAGCTCCTCTTTTTGAGAGTCACTTTGTAGCCTATTTGCCATTGCTGTCTCTGGCTGCACCGGAGACAGGTTTTAATGTCCTCTTAATTTTACCTCATAGACTGTACATTCCAAAAGCAAAGAGACAAAAAGCAGGAGGAGACAAAAACAAGAGAGAAAAGCTTTATAAAAAGTTTCAACCCCTGTGGGAAATAAAAGTCTTATTCTTC
>CR1-Y2_Aves-cAur#LINE/CR1
CTATTAATGCTGTMACTTGTTCATAGAAGGCCACCAGGTTTGTYAGGCAGGATTTGCCCTTGGCAAAGCCATGCTGACTGCTCCCAATCACCTCTTCACTANTCTTCTGAGTCAGTAGTGCCTCCAGGAGGATCTGCTCCATGATCTTTCCGGGCACAGAGGTGAGACTGACMGGCCTGKAGTTCCCTGGTTCCTCCTTCTTACCCTTTTTGAAAATGGGAGCAATGTTTGCCCTTTTCCAWTCTGTGGGGACTTCCCCAGTCTGCCATGACTTTTGGAATAYAATAGAGAGGGGCTTAGCAACCTCATCTGCCAGTTCTCTCAGCACCCGTGGGTGTATCCCGTCGGGTCCCATGGACTTGAACACTTTCAGGTTCTTCAGGTGATCACRAACCTGAGCTTCACTTAKGAAGGGCAGTTCTTCCTCCCCMTCCCTGGCATCGTCTGCCATGACTCCAGGAGTGTGGCTGGAGGCCCTTGCAGTGAAGACTGAGGTAAAGAAGTTATTGAGTACCTCAGCTTTTCCACATCACTTGTGACCAATTCACCAGTTTCCTTTCTGAGGGGGCCCACACCTTCCCTACTCMTCTTCTTRCCATTAATATACCTGTAGAAATTCTTAGTGCTCCCTTTGACCTCCCTGGCTAGATTCARTTCAAACTCTGCTTTGGCTTTCCTAACCAGGCCTCTTGCTGCTCGGGCAGCTTCCTTATATNCCCCCTGTTCTANCTGTCCTTCCCTCCACTSCCTGTAGAGTTTCTTTTTAAGTAATAGTGTGTCCAGNAGCTCCTTGTTCATCCAGGCAGGCCTCCTAGCGTTCTTCCCTGTTTTTCTCCTTGTTGGTATACATAGCTCCTGGACACAGAGGAGGTGGTCCTTGAATACTGACCAGCTGTCCTGGGTCCCTCTTCCCTCCAGGGCTTTGTCCCATGACACTGTGGCTAGCAGAMTCCTGAAGCGATCGAAGTCTGCAMGCCTAAAGTCTAGGGYCATAAGCTTAGAATAGGTCCTCCTGATRGCCCTGAGGATATTAAATTCAACTGCTTCATGGTCACTGCAGCCAAGGCTGTCTCTGAGCCTCACATTGGTTACCAGCCCTTCCCTGTTGGTGAGAACAAGGTCCAGCAGAGCACCTTTTCTTGTTGGTTCCTCTACCATTTGGAGGAGGAAGTTGTCTTCTATGCAGTCCAGGAACATCCTGGATTGCTGGTGCCTTGCTGTGTTGTCCCTCCAGCAGATGTCAGGGTGGTTGAAATCMCCCATGAGGACCAGGGCTTGTGACCTGGAAGCCGCTTCTATTTGCCTGTMGAGGGCCTCATCTGCTTGGTTCTGCTGGTCAGGTGGCCTGTAGGAGACCCCCACAGTAATATCTCCTTCCCCTGTCTTGCCTTTAATTCTAACCCATACACTCTCAACCATCTCATCATCCCTCCCCAGGTGGAGTTCTGCTGACTCCAGCTGGTTCTTGACATAGAGGGCAACACCTCCTCCTCTCCTTCCCTGCCTATCCTTCCTAAAAAGCTTSTACCCRTCTATCCCTACATTCCARTCATGGGAATCATCCCACCAAGTTTCAGTAATGCCCACTATGTCATGGCCTCCSAGSAGCACGG
>CR1-K4_Tgu-cAur#LINE/CR1
CAGTTCGGCTCAATCGCCASTCAGAACCGCTCCTTCGGGACAGCTCCGCTTGCCTAGTGAGTTTCTGCTGGGCNTTTTGCCTTGCTTTCGGGGTTTAGCGGGTCGGGAGGACTCCTGGGGGGCAGGGATTGAGGCGGGCTCGTGCTCTCGCGAGCGTGCACGGGAGCGAGTGCCTGACGTCAGCCGCGGGAGATTTAAATCCCAGCCGGGCTGTGCGGGCGACGCCAGTTCGGCTCAATCGCCASTCAGAACCGCTCCTTCGGGACAGCTCCGCTTGCCTAGTGAGTTTCTGCTGGGCNTTTTGCCTTGCTTTCGGGGTTTAGCGGGTCGGGAGGACTCCTGGGGGGCAGGGATTGAGGCGGGCTCGTGCTCTCGCGAGCGTGCACGGGAGCGAGTGCCTGACGTCAGCCGCGGGAGATTTAAATCCCAGCCGGGCTGTGCGGGCGACGCCAGTTCGGCTCAATCGCCAGTCAGAACCGCTCCTTCGGGACAGCTCCGCTTGCCTAGTGAGTTTCTGCTGGGCTTTTTGCCTTGCTTTCGGGGTTTAGCGGGTCGGGAGGACTCCTGGGGGGCAGGGATTGAGGCGGGCTCGTGCTCTCGCGAGCGTGCACGGGAGCGAGTGCCTGACGTCAGCCGCGGGAGATTTAAATCCCAGCCGGGCTGTGCGGGCGACGCCAGTTCGGCTCAATCGCTAGCCTTTCGGCTGCTTGCGCAAAAAAAAAAAAAAAAAAAAAANNNAWWWTTTTTTTTTTTTGCTTGCTTTGTTTTTGTTTTTTGTTTTTTGTTTTCACTCATACGCTGCACCATGGTCATTACTCGGACCAAGGGTAGAAAAATAGCATCTACCCAGACAGAGTTGTTTCTCCAGCATGCTGGAGTCCAGGCTGCCAGCTGCGGAGAGTGCTTCAGCCTGGCAGTTGGAATAGAGGGAGAGGGAGAGGGAGAGGACACCTGTGTCAGGTGTGAGCAGGTGAACTTTCTCCTCAGCCTGGTGGCTGACCTGAAGGATGAAGTGGCCAAGCTGAAAGAGGAGGTGTCTAGGCTGAGGTCAATAAGGGAAAGCGAACGGGAGTTAGACTTGTGGGAGAAGGCTCTGCAGATCTCCCCTGCTGAGGGCCGGGCCCCTGAAAACGGAGAGGGATGGACACAGGTCCCTGCCAAGGGTGGCAAGAGAAATCCACCCCGGCCCTCTCCTCCTCCTCCGCTGCCCTTGCGTAATAAGTATGAGGCCCTGCAGGCTGAGGGCGGTGGGGATGAGAGGGCTGAGGAGCGGCCATCCAGAGGGGATACCAGGGCCAAGCGGTCCCCGCCGGCTGTAACGACCAGCTCTGGGGAGCAGCCTAAGGCCAAGCCTAAGACCAAGCGGCCACCACCAGCTATAATGACCGGCTCCACAAAGAGAAGGAGAAGGGTTATAGTTGTTGGGGACTCTCTCCTGGGGGGTACTGAGGGACCCATATGTCGTCCCGACCCATCCCACAGGGAGGTCTGCTCTCTACCTGGGGCGCGGATAAGGGATATTGCAAGGGGAATCCCCAAGCTCATCAGTCCCTCTGACTATTACCCTCTACTGGTAATACAGGCTGGGAGTGATGAGATCGACAGGAAGGGCACCAGGGCAATTAAGAAGGAGTTCAGGGCCCTTGGACAATTGATTGATGGGGCAGGCGCGCAAGTGGTGTTCTGCTCAGTTCCC
>R2-1_PPu-cAur#LINE/R2
ACCAGAACAAGRGGACACAGTCTCAAGCTGYSCCAGGGGAAKTTTAGACTRGAGGTGAGGAGAAAGTTCTTCACYRAGAGAGTYATTCACCATTGGAATGKGCTGCHYAGGGAGGTGGTGGAGTCACCRTCYCTSGAGGTGTTCAAGAGGGGATTGGACGTGGCACTTNGNNNCNTGGTCTAGTCATGAGGTCTGTGGTGACAGGTTGGACTCRATGATCTTYRAGGTCTCTTCCAACCTTAGTGATAYTGWRATACTGTGATAATCCTYATCTTCAAGCAAAGGCAAACCTTCCCTAGAGTCTTCTAAAGCTATCCAAAMCCAATCCTTCTCCTACACAGAAACATAGAATCACAGAACTGTTGTGGTTGGGAAAGACCTTCAAGGTCACCCAGGGCAGCCATTACCTAAGCCTACCAAGTCTGCTGGCAAAGCATGGCCARGGGCTCTGGCAAGGCTGAAAGCCCAACAGGACCWAGGTCTTGGTCCCTGGGCTCTGGCAGTTGTCTCTGCCACCCAGGCCTGGGAGCAGATCCTTTATTTTGAGGCTTTCAGGCTCTACTGTCCCCAGGGACTGTGCTCAGGGCTTGGCCTTCCTGCTCCATAACCCAAACCCAGGGTTTTTCAGCATCACAGACTCCTGCATTTTACCNTTTTTTTGSTCTAGAAATCACAGCCTCCAATTACCTGCTCTAAGGAGCCCCTGGGGAGGCTTTGTCAGTAACAAGCCCCAGTGGGGCCAATCAGTGCTTCAAGCTACTTTGGCATTTGCTGCTGACTTCTGGAGCAGTTTCTTCAATCTTCTCTCAGTCCCTGACACCTGGAGTCAGCCCCAAATCCTCCATGGGGCTCATTAGAACACAGAAGTCCCTCAGGAGCTGTGGCTCTGCCTGGGATTTCCTTCAGGTACTGAAGACTTGTCCAGCTCCTTGGAGCTTTTTCACAGCTAATTGAAGCTGTTTCAGAGTGCAGTTAATGAGGAAGATTTCCCACTGGGCCTCATAACCCCCTGGGTTGTTTTTAAAGGATGTTTTTAATTAGCTGCATTTGAGAGAAGGGAGCTGACAGCAGCACTCTCCATGTCACCTTGATCCACAGAGTCTCCTCAAGAGGCCTGGACTCAAAGGAAACACTCTTCCCCAAGATCTGACACTGTATGAACAACTTTGCTCCTCACCCCCTCCACAACCTCCCCATTGCTGTCATTGCCCACCTGGGGCTTACATCACTGTCCCATCAGACTTCTTCACTGCTCTCTGCAGCTGCAGGTCATAGTTCCATGGCACCAGCTCCCCCCTGCTCTCCATAGAGATCTGTCTGCATACAGCCACAGGAGAATTGTTCCTGTTTAGAAGTAAAGAAAAACAAAGTCTGATAAAGTTGCATCAGTAATCAAACCCCTCTGGAACCAGCTGCTCAGCACAAGATGTCTCTCAGTAGGCTGCCTCTCTCCAAGGCATGATCTGAGAAGCAAAGTTTTAGGCAAGTAGATACAAGAGGTGGAGAGCAAAACCAATCACAGAGGTGGCCCAGGGGACAACTGCAGCTTTGCCTCCCGAAAGGTCAAAGCAGCATAGGAGAGAGGAACCGGAATGAACAAAGAATAAGTGCAGAAGCAAATTGGAGAATGATGGAAAGGGCCTTGGGCTGTCCAGTCTGCCCCGGGAAAGGTGACTCCAGAGATGGTCACTGTGTCCTGGAGAGGACGGTACATGACATCTTAATGAAGCAGATGGTCTAAGAGGTAGTCACCCCYACCCCCACCCCCTTTTCTGGTATGACTCTAGTCTACCAAAGCTCTGCTCTGATTTAAAGCAACAGTGCTAATTTCATCATTCCTGATTGTAATGTCTCTCAGAGATTTGTTATTTAGAGGTTTGCTAAGTCTTCCTAGTAAGCATAATGAATAGTAAGCATTTGGTATYTACAGGTACTCAGTACATAGTAATTGCAGTAAGGCATAAGCACTTAGTAATGAGTTCACAYTGTAAGTTCTTCTTTTGGTTCGAACCTTCTTAGCTGTGTGCCTCGGCATTGCAAAGGAGCTCCGTGTAATATAGTTAAGGTTTGTAGTAAATAGGTATTCATTCTTAAAAGTATTCCTTAGCTAATGTAACATCTTTCTATTTCCTTCTTAGACATTGACTAGAAAACATACAAATAATACAAAAAATAGTAAAAAAGAAAACAANTTAAAAAAAATTTAAAATACAAATATATATAACAAAACAAAACCAAAATACTACAACTTAGATACAAAAAGAACAATAAAACATAACAAAATAATAACAAAAAATAATGATAGAGAACAAATTAAAAACAAACAACAAAAAAGTTTAAAATAAAAATAAATTAACAAANTAANAATAGANAAAGAAGAGCAACAATAAAAACAAAACAATNAAAACAAAATATAACNANCTAAAAAATAGCTATTAACAAAAAACATAAGGATTATCAGCAAAAAAWACAAATAAGGACTATCAAGACTACTAGATTANAAAAAAACAAAMAAAMWWATAWWRAAAAATTCAAAAAARTTAAAATGAAAAATRATAATAAAAAAGAATTAATAGAAAAGAAGGTTAAAAAATAATAAAAAAGCAAAAATCAAAATTAAAATAGAAAATAGATTAAATAAAACAAACATGCAAAAGATAAAAAATAATTAAAATAAACAATATAAGATCAARAAATTAAAAATTGAAAACTAGATAAAAAAAANNTNAAANNATTTNAAAATTKATAACAAAAAAANTNWAAAATTACAATAACAAAATAAAAMYAATNTTTNAAAAA
>CR1-J3_Pass-cAur_a#LINE/CR1
AGAATAGAVTAGAATAGAATAGAATAGAATAAACCAGGTTGGAAGAGACCTTCAAGATCATCGAGTCCAACCTATCAYCCAACACCAYCTAATCAACTAAACCATGGCACCAAGCACCCCATCAAGTCTCCTCCTRAACACCTCCAGTGATGGTGACTCCACCACCTCCCTGGGCAGCACATTCCAATGGCCAATCACTCTCTCTGTGAAGAACTTCTTCCTAACATCCAGCCTAAACCTCCCCTGGCACAGCTTGAGACTGTGTCCTCTTGTTCTGGTGCTGGTTGCCTGGGAGAAGAGACCAACCCCCACCTGGCTACAACCTCCCTTCAGGTAGTTGTAGAGAGCAATAAGGTCTCCCCTGAGCCTCCTCTTCTCCAGGCTAAGCAACCCCAGCTCCCTCAGCCTCTCCTCACAGGGCTGTGCTCCAAACCCCTCCCCAGCTTTGTTGCCCTTCTCTGGACACCTTCCAGCAAGTCAACATCCTTCCTAAACTGAGGGGCCCAGAACTGGACACAGGACTCAAGGTGTGGCCTAACCAGTGCAGTGTACAGGGGCAGAATGACCTCCCTGCTCCTGCTGGCCACACTGTTCCTGATGCAGGCCAGGATGCCATTGGCCYTCTTGGCYACCTGGGCACACTGCAGGCTCATGTTCAGCCTACYATCAACCAGYACCCCCAGGTCCCTCTCTGCCTGGCTGCTCTCCAGCCACTCTGACCCCAGCCTGTAGCACTGCMTGGGGTTGYTGTGGCCAATGTGYAGAACCYGGCACTTGGATGTGTTMAATCTCMTGCCCTTGGMCTCTGCCCATCTGTCCAGCCTGTC
>CR1-J3_Pass-cAur_b#LINE/CR1
GTCCCCCACAGCAAACTCCTGGCCAAGCTGKCAGCCCATGGCTTGGAYAGGAGCACMCTGCGHTGGGTTAGGAACTGGCTGGAGGGCYGAGCCCABAGAGTGGTGGTGAATGGTGCCACATCCAGCTGGCAGCCWGTCACTAGTGGTGTGCCCCARGGATCAGTGCTGGGCCCCATGCTCTTCAACATCTTTATTGATGATCTGGATGAGGGCATTGAGTCCATCATCAGTAAATTTGCAGAYGACACCAAGCTGGGGGCAGGAGTTGATCTGCTGGAGGGCAGAGAGGCTTTGCAGAGGGACCTCGACAGGCTGGACAGATGGGCAGAGTCCAAGGGCAKGAGATTGAACACATCCAAGTGCCGGGTTCTGCACATTGGCCACAGCAACCCCATGCAGTGCTACAGGCTGGGGTCAGAGTGGCTGGAGAGCGGCCAGGCAGAGAGGGACCTGGGGGTACTGGTTGATGGTAGGCTGAACATGAGCCTGCAGTGTGCCCAGGCAGCCAAGAGGGCCAATGGCATCCTGGCCTGCATCAGGAACAGTGTGGCCAGCAGGAGCAGGGAGGTCATTCTGCCCCTGTACACTGCACTGGTTAGGCCACACCTTGAGTCCTGTGTCCAGTTCTGGGCCCCTCAGTTTAGGAAGGAGGTTGACTTGCTGGAACGTGTCCAGAGAAGGGCAACAAAGTTGGTGAGGGGTTTGGAACACAAGCCCTATGAGGAGAGGCTGAGGGAGCTGGGGTTGCTTAGCCTGGAGAAGAGGAGACTCAGGGGTGACCTTATTGCTCTCTACAACTACCTGAAGGGAGGTTGTAGCCAGGCAGAGGTTGGTCTCTTCTCCCAGGCAGCCAGTACCAGAACAAGAGGACACAGTCTCAGGCTGCGCCAGGGGAGGTTTAGGCTGGATGTTAGGAAGAAGTTCTATACAGAGAGAGTGATTGCCCATTGGAATGGGCTGCCCGTGGAGGTGGTGGAGTCACCTTCATTGGAGGTGTTCAGGAGGAGACTTGATGGGGTGCTTGGTGCCATGGTTTAGTTGTTTAGGTGGGTTGGATTGGTTGATAGGTTGGACGCGATGATCTTGAAGGTCTCTTCCAACCTGGTGTATTGTATTGTATTSTATT
>CR1-J3_Pass-cAur_c#LINE/CR1
TCCATCWTCAGTAAATTTGCAGATGACACCAAGCTGGGGGCAGGAGTTGATCTGCTGGAGGGCAGAGAGGCTTTGCAGAGGGACCTCGACAGGCTGGACAGATGGGCAGAGGCCAAGGGCAGGAGATTGAACACATCCAAGTGCCRGGTTCTGCACATTGGCCACAGCAACCCCAGGCAGTGCTACAGGCTGGGGTCAGAGTGGCTGAGAGCAGCCAGGCAGAGAGGGACCTGGGGGTGCTGGTTGATGGKAGGCTGAACATGAGCCTGCAGTGTGCCCAGGCAGCCAAGAGGGCCAATGGCATCCTGGCCTGCATCAGGAACAGTGTGGCCAGCAGGAGCAGGGAGGTCATTCTGCCCCTGTACACTGCACTGGTTAGGCCACACCTTGAGTCCTGTGTCCAGTTCTGGGCCCCTCAGTTTAGGAAGGAGGTTGACTTGCTGGAAGGTGTCCAGAGAAGGGCAACAAAGYTGGKGAGGGGTTTGGAACACAGCCCTGTGAGGAGAGGCTGAGGGAGCTGGGGTTGCTTAGCCTGGAGAAGAGGAGGCTCAGGGGAGACCTTATTGCTCTCTACAACTCCCTGAAGGGAGGTTGTAGCCAGGCAGAGGTTGGTCTCTTCTCCCAGGCAGCCAGCACCAGAACAAGAGGACACAGTCTCAGGCTGCGCCAGGGGAGGTTTAGGCTGGATGTTAGGAAGAAGTTCTACACAGAGAGAGTGATTGCCCATTGGAATGTGCTGCCCGGGGAGGTGGTGGAGTCACCATCACTGGAGGTGTTCAGGAGGAGACTTGATGGGGTGCTTGGTGCCATGGTTTAGTTGTTTAGGTGGGTTGGATTGGTTGATGGGTTGGACRCGATGATCTTGAAGGTCTCTTCCAACCTGGTGTATTGTATTGTATTSTATT
>CR1-J3_Pass-cAur_d#LINE/CR1
TGGGTTAGGAACTGGCTGGANGGCTGAGCCCAGAGAGTGGTGGTGAATGGTGCCACAGCCAGCTGGCAGCCAGGCACCAGTGGTGTGCCCCAGGGATCRGTGCTGGGCCCCATGCTCTTNAACATCTTTATTGATGATCTGGATGAGGGCATTGAGTCCATCATCAGTAAATTTGCRGAYGACACCAAGCTGGGGGCAGGAGTTGATCTGCTGGAGGGCAGAGAGGCTCTGCAGAGGGACCTCGACAGGCTGGACAGATGGGCAGAGGCCAAGGGCAGGAGATTGAACACATCCAAGTGCCAGGTTCTGCACATTGGCCACAGCAACCCCAGGCAGTGCTACAGGCTGGGGTCAGAGTGGCTGGAGAGCAGCCAGGCAGAGAGGGACCTGGGGGTGCTGGTTGATGGTAGGCTGAACATGAGCCTGCAGTGTGCCCAGGCAGCCAAGAGGGCCAATGGCATCCTGGCCTGCATCAGGAACAGTGTGGCCAGCAGGAGCAGGGAGGTCATTCTGCCCCTGTACACTGCACTGGTTAGGCCACACCTTGAGTCCTGTGTCCAGTTCTGGGCCCCTCAGTTTAGGAAGGAGGTTGAGTTGCTGGAAGGTGTCCAGAGAAGGGCAACAAAGCTGGGGAGGGGTTTGGAACACAGCCCTGTGAGGAGAGGCTGAGGGAGCTGGGGTTGCTTAGCCTGGAGAAGAGGAGGCTCAGGGGAGACCTTCTTGCTCTCTACAACTACCTGAAGGGAGGTTGTAGCCAGGCAGRGGTTGGTCTCTTCTCCCAGGCAGCCAGCACCAGAACAAGAGGACACAGTCTCAGGCTGCGCCAGGGGAGGTTTAGGCTGGATGTTAGGAAGAAGTTCTACACAGAGAGAGTGATTGGCCATTGGAATGTGCTGCCCAGGGAGGTGGTGGAGTCACCATCACTGGAGGTGTTCAGGAGGAGACTTGATGGGGTGCTTGGTGCCATGGTTTAGTTGATTAGGTGGTGTTGGKTGATGGGTTGGACGTGATGATCTTGAAGGTCTCTTCCAACCTGGTYTATTCTATTCTATTCTATTCTATTCTATTCCAKTCTATTC
>CR1-J3_Pass-cAur_e#LINE/CR1
AATAGAATASAATASAATAGAATAGAATAAACCAGGTTGGAAGAGACCTTCAAGATCATCGTGTCCAACCTATCAACCAATCCAACCCACCTAAACAACTAAACCATGGCACCAAGCACCCCATCAAGTCTCCTCCTGAACACCTCCAGTGATGGTGACTCCACCACCTCCCTGGGCAGCACATTCCAATGGGCAATCACTCTCTCTGTGTAGAACTTCTTCCTAACATCCAGCCTAAACCTCCCCTGGCGCAGCTTGAGACTGTGTCCTCTTGTTCTGGTGCTGGCTGCCTGGGAGAAGAGACCAACCCCCRCCTGGCTACAACCTCCCTTCAGGTAGTTGTAGAGAGCAATAAGGTCACCCCTGAGCCTCCTCTTCTCCAGGCTAAGCAACCCCAGCTCCCTCAGCCTCTCCTCACAGGGCTGTGTTCCAAACCCCTCACCAACTTTGTTGCCCTTCTCTGGACACCTTCCAGCAASTCAACMTCCTTCCTAAACTGAGGGGCCCAGAACTGGACACAGGACTCAAGGTGTGGCCTAACCAGTGCAGTGTACAGGGGCAGAATGACCTCCCTGCTCCTGCTGGCCACACTGTTCCTGATGCAGGCCAGGATGCCATTGGCCYTCTTGGCTGCCTGGGCACACTGCAGGCTCATGTTCAGCCTMCCATCAACCAGCACCCCCAGGTCCCTCTCTGCCTGGCTGCTCTNCAGCCACTCTGACCCCAGCCTGTAGCACTGCCTGGGGTTGCTGTGGCCAATGTGCAG
>CR1-J3_Pass-cAur_f#LINE/CR1
GGTTAGGAACTGGCTGGAGGGSCGAGCCCAKAGAGTGGTGGTGAATGRTGCCACATCCRGCTGGYAGCCAGKCACTAGTGGTGTGCCCCAAGGATCAGTGCTGGGCCCCATGCTCTTCAACATCTTTATTGATGATCTGGATGAGGGCATTGAGTCCATCATCAGTAAATTTGCRGAYGACACCAAGCTGGGGGCAGGAGTTGATCTGCTGGAGGGCAGAGAGGCTTTGCAGAGGGACCTCGACAGGCTGGACAGATGGGCAGAGTCCAAGGGCAGGAGATTGAACACATCCAAGTGCCGGGTTCTGCACATTGGCCACAGCAACCCCATGCAGTGCTACAGGCTGGGGTCAGAGTGGCTGGAGAGCGGCCAGGCAGAGAGGGACCTGGGGGTACTGGTTGATGGTAGGCTGAACATGAGCCTGCAGTGTGCCCAGGCAGCCAAGAGGGCCAATGGCATCCTGGCCTGCATCAGGAACAGTGTGGCCAGCAGGAGCAGGGAGGTCATTCTGCCCCTGTACACTGCACTGGTTAGGCCACACCTTGAGTCCTGTGTCCAGTTCTGGGCCCCTCAGTTTAGGAAGGAGGTTGACTTGCTGGAACGTGTCCAGAGAAGGGCAACAAAGTTGGTGAGGGGTTTGGAACACAAGCCCTATGAGGAGAGGCTGAGGGAGCTGGGGTTGCTTAGCCTGGAGAAGAGGAGACTCAGGGGTGACCTTATTGCTCTCTACAACTACCTGAAGGGAGGTTGTAGCCAGGCAGAGGTTGGTCTCTTCTCCCAGGCAGCCAGYACCAGAACAAGAGGACACAGTCTCAGGCTGTGCCAGGGGAGGTTTAGGCTGGATGTTAGGAAGAAGTTCTATACAGAGAGAGTGATTGCCCATTGGAATGGGCTGCCCGKGGAGGTGGTGGAGTCACCTTCATTGGAGGTGTTCAGGAGGAGACTTGATGGGGTGCTTGGTGCCATGGTTTAGTTGTTTAGGTGGGTTGGRTTGGTTGATRGGTTGGACRCGATGATCTTGAAGGTCTCTTCCAACCTGGTGTATTGTATTSTATTSTAT
>CR1-J3_Pass-cAur_g#LINE/CR1
AATAYAATACAATACAATAMACCAGGTTGGAAGAGACCTTCAAGATCATCGCGTCCAACCCATCAACCAATCCAACCCACCTAAACAACTAAACCATGGCACCAAGCACCCCATCAAGTCTCCTCCTGAACACCTCCAATGATGGTGACTCCACCACCTCCACGGGCAGCCCATTCCAATGGGCAATCACTCTCTCTGTATAGAACTTCTTCCTAACATCCAGCCTAAACCTCCCCTGGCGCAGCCTGAGACTGTGTCCTCTTGTTCTGGTGCTGGCTGCCTGGGAGAAGAGACCAACCTCTGCCTGGCTACAACCTCCCTTCAGGTAGTTGTAGAGAGCAATAAGGTCACCCCTGAGTCTCCTCTTCTCCAGGCTAAGCAACCCCAGCTCCCTCAGCCTCTCCTCATAGGGCTTGTGTTCCAAACCCCTCACCAACTTTGTTGCCCTTCTCTGGACACGTTCCAGCAAGTCAACATCCTTCCTAAACTGAGGGGCCCAGAACTGGACACAGTACTCAAGGTGCGGCCTAACCAGTGCAGTGTACAGGGGCAGAATGACCTCCCTGCTCCTGCTGGCCACACTGTTCCTGATGCAGGCCAGGATGCCATTGGCCTTCTTGGCTGCCTGGGCACACTGCAGGCTCATGTTCAGCCTACMATCAACCAGYACCCCCAGGTCYCTCTCTGCCTGGCCRCTCTCYAGCCACTCTGAC
>CR1-J3_Pass-cAur_h#LINE/CR1
ATCACAGTATCACAGTATCACCAAGGTTGGAAGAGACCTCAAAGATCATCAAGTCCAACCTGTCACCACAGACCTCATGACTAGACCATGGCACCAAGTGCCACGTCCAATCCCCTCTTGAACACCTCCAGGGACGGTGACTCCACCACCTCCCTGGGCAGCCCATTCCAATGGCGAATGACTCTCTCAGTGAAGAACTTTCTCCTCACCTCRAGCCTAAACTTCCCCTGGCGCAGCTTGAGACTGTGTCCTCTTGTTCTGGTGCTGGTTGCCTGRGAGAAGAGACCAACCCCCTCCTGGCTACAACCACCCTTCAGGTAGTTGTAGAGAGCAATRAGGTCTCCCCTGAGCCTCCTCTTCTCCAGGCTAAACAATCCCAGCTCCCTCAGCCTCTCCTCATAGGGCTTGTGCTCAAGGCCTCTCACCAGCCTTGTTGCCCTTCTCTGGACACGTTCAAGTGTCTCGATGTCCTTCTTAAACTGAGGGGCCCAGAACTGGACACAGTACTCAAGGTGTGGCCTAACCAGTGCAGAGTACAGGGGCACAATGACTTCCCTGCTCCTGCTGGCCACACTATTCCTRATGCAGGCCAGGATGCCATTGGCCTTCTTGGCCACCTGGGCACACTGCTGGCTCATGTTYAGGCRGCTGTCAAYCAGCACCCCCAGGTCCCTCTCTGTTTGGCAGCTCTCCAGCCACTCTGACCCCAGCCTGTAGCTCTGCATGGGGTTGNTGTGGCCAAAGTGCAGCACCCNGCACTTGGACTTKTTRAATGCCATCCCATTRGACTMTRCCCATCTGTCCAGT
>CR1-J3_Pass-cAur_i#LINE/CR1
CTGGTGGATGTGGGGAKGCCTGTGGATGTKGTCTACCTGGACMTCAGCAAGGCCTTTGACACCATCCCCCMCAGCAAACTCCTGGCCAAGCTGSCAGCCCATGGCTTGGACSGCAGCACACTGCATTGGGTTAGGAACTGGCTGGAGGGCMGAGCCCAGAGAGTGGTGGTGAATGGTGCCACATCCSGCTGGMKGCCRGTCAYCAGTGGTGTCCCCCAAGGATCMGTGCTGGGCCCCATGCTCTTCAACATCTTTATTSATGATCTGGATGAGGGCATCGAGTCCATCATCAGTAAATTTGMKGMCGACACCAAGCTNGGGGCAGSAGTTGATCTGTTGGAGGGCAGGGGGNCTCTGCAGAGGGACCTTGACAGGCTGGACAGATGGGCAGAMTCCAACGGCATGAGATTDAACACATCCAAGTGCCGGGTTCTGCACTTTGGCCACAMCAACCCCATGCAGTGCTACAGGCTGSGGTCAGAGTGRTTGGAGAGCAGCCAGGCAGAGAGGGACCTGKGGGTGCTGGTTGANNGNNGGNTGAACATGAGCCTGCAGTGTGCCCAGGTAGCCAAGANGGCCAATGGCATCCTSGCCTGCATCAGGAASAGTGTGGCCAGCAGGAKCAGGGAGGTCATTCTGCCCCTGTACACYGCACTGGTTAGGCCKCAYCTYGAGTCCTGTGTCCAGTTCTGGGCCCCTCAGTTTASGAAAGATGTTGTCTTSCTGGAKCKTGTCCAGAGAAGGGCAA
>CR1-J3_Pass-cAur_j#LINE/CR1
GAATRGAATAKAATASAATASAATASAATAGAATAGAATARACCAGGTTGGAAGAGACCTTCAAGATCATCAYGTCCAACCTATCAACCAATNCAACCCACCTAAACAACTAAACCATGGCACCAAGCACCCCATCAAGTCTCCTCCTGAACACCTCCAGTGATGGTGACTCCACCACCTCCCTGGGCAGCCCATTCCAATGGGCAATCACTCTCTCTGTGTAGAACTTCTTCCTAACATCCAGCCTAAACCTCCCCTGGCGCAGCCTGAGACTGTGTCCTCTTGTTCTGGTGCTGGTTGCCTGGGAGAAGAGACCAACCTCTGCCTGGCTACAACCTCCCTTCAGGTAGTTGTAGAGAGCAATAAGGTCACCCCTGAGTCTCCTCTTCTCCAGGCTAAGCAACCCCAGCTCCCTCAGCCTCTCCTCACAGGGCTTGTGTTCCAAACCCCTCACCAACTTYGTTGCCCTTCTCTGGACACCTTCCAGCAAGTCAACCTCCTTCCTAAACTGAGGGGCCCAGAACTGGACACAGGACTCAAGGTGTGGCCTAACCAGTGCAGTGTACAGGGGCAGAATGACCTCCCTGCTCCTGCTGGCCACACTGTTCCTGATGCAGGCCAGGATGCCATTGGCCCTCTTGGCTGCCTGGGCACACTGCAGGCTCATGTTCAGCCTACCATCAACCAGCACCCCCAGGTCCCTCTCTGCCTGGCTGCTCTCCAGCCACTCTGACCCCAGCCTGTAGCACTGCCTGGGGTTGCTGTGGCCAATGTGCAGAACCTGGCACTTGGATGTGTTCAATCTCCTGCCCTTGGACTCTGCCCATCTGTCCAGCCTGTCSAGGTCCCTCTGCAAAGCCTCTCTGCCCTCCAGCAGATCAACTCCTGCCCCCAGCTTGGTGTCRTCTGCAAATTTACTGATGATGGACTCAATGCCCTCATCCAGATCATCAATAAAGATGTTGAAGAGCATGGGGCCCAGCACTGATCCYTGGGGCACACCACTAGTG
>CR1-J3_Pass-cAur_k#LINE/CR1
GATGGGATCCATCCTAGGGTGCTGAGAGAGCTGGCAGATGAGCTGGCCAAGCCGCTCTCCATCATTTTTCAGCAGTCCTGGCTCACTGGAGAGGTCCCAGAAGACTGGAAGCTGGCCAACGTGGTGCCCATCCACAAGAAGGGCCNNTTGGANGAGCCAGGGAATTATAGGCNTGTCAGNCTGACCTCAGTGCCAGGCAAGATTATGGAACAGGTCATCTTGAGTGCAATCAYACAGCACWTNCAGGATGGCCAAGGGCTCAGGSCTAGCCAGCACGGATTTANGNAGGGCAGGNCCTGCYTGACCAACCTGATCTCCTTCTATGATCAGGTGACCCGCCTGGTSGATGTGGGGAGGCCTGTGGATGTKGTCTACCTGGACCTCAGCAAGGCCTTTGACACNGTCCCCCACAGCAAACTCCTRGCCAAGCTGGCAGCCCATGGCTTGGAYGGGNAGCACACTGCATTGGGTWAGGAAYTGGCTGGANGGCNGAGCCCAGAGAGTNGTGGTNAATGGTGCCACATCCKGCTGGCRGCCAGTCACNAGTGGTGTGCCCCASGGATCRGTGCTGGGCCCCATGCTCTTCARCATCTTTATTGATGATCTGGATGAGGGCATMGAGTCCATCATCAGTAAATTTGCNGACGACACCAAGCTGGGGGCAGTAGTTGATCTGCTGGAGRGCAGAGAGGCTTTGCAGAGGGACCTCKACAGGCTGGACAGATGGCAGAMTCCAACKGCATGAGATTYAACACATCCAAGTGCNGGGTTCTGCACATTGGCCACASCAACCCCATGCAGTGCTACAGGCTGGGGTCAGAGTGGCTGGAGAGCKGCCAGGCAGAGAGGGACCTGGGGGTGCTGGTWGATTGTAGGCTGAACATGAGCCTGCAGTGTGCCCAGGCAGCCAAGANGGNCAATGGCATCCTKGCCTGCATCAGSAACAGTGTGGCCAGCAGGAGCAGGGAGGTCATTCTGCCCSTGTACACTGCACYGGTTAGGCCKCACCTCGAGTACTGTGTCCAGTTCTGGGCCCCTCAGTTTAGGAASGATGTTGMCTTKCTGGASCSTGTCCAGAGAAGGGCAACGAAGTTGGTGAGGRGTTTGGAARACAAGCCCTATGAGGAGAGKCTGAGGGAGCTGGGGTTGCTTAGCCTGGAGAGGAGGAGACTMAGGGGTGACCTTATTGCTCTCTACAACTACCTGAAGGGAGATTGTAGACAGGCWGAGGTTGGTCTCTTMTCCCAGGCAGMCAGCACYAGAACAAGAGGACACAGTCTCAGGCTGCGCCAGGGNAGGTTTAGRCTGGATCTTAGGAMGAAGTTCTAWACCGAGAGAGTGATTGCCCATTGGAATCGGCTGCC
>CR1-J3_Pass-cAur_l#LINE/CR1
CCCCAGGGATCAGTGCTGGGCCCCATGCTCTTCAACATCTTTATTGATGAYCTGGATGAKGGCATYGAGTCCATCATCAGTAAATTTGCKGAYGACACCAAGCTGGGGGCAGGAGTTGATCTGCTGGAGGGNAGAGAGGCTTTGCAGAGGGACCTCGACAGGCTGGACAGATGGGCAGAGTCCAASGGCAKGAGATTGAACACATCCAAGTGCCGGGTTCTGCACATTGGCCACAGCAACCCCATGCAGTGCTACAGGCTGGGGTCAGAGTGGCTGGAGAGCGGCCAGGCAGAGAGGGACCTGGGGGTGCTGGTTGATKGTAGGCTGAACATGAGCCTGCAGTGTGCCCAGGCAGCCAAGAGGGCCAATGGCATCCTGGCCTGCATCAGGAACAGTGTGGCCAGCAGGAGCAGGGAGGTCATTCTGCCCCTGTACACTGCACTGGTTAGGCCACACCTTGAGTCCTGTGTCCAGTTCTGGGCCCCTCAGTTTAGGAAGGATGTTGACTTGCTGGAACGTGTCCAGAGAAGGGCAACAAAGTTGGTGAGGGGTTTGGAACACAAGCCCTATGAGGAGAGGCTGAGGGAGCTGGGGTTGCTTAGCCTGGAGAAGAGGAGACTCAGGGGTGACCTTATTGCTCTCTACAACTACCTGAAGGGAGGTTGTAGCCAGGCAGAGGTTGGTCTCTTCTCCCAGGCAGCCAGCACCAGAACAAGAGGACACAGTCTCAGGCTGCGCCAGGGGAGGTTTAGGCTGGATGTTAGGAAGAAGTTCTATACAGAGAGAGTGATTGCCCATTGGAATGGGCTGCCYGKGGAGGTGGTGGAGTCACCTTCATTGGAGGTGTTCAGGAGGAGACTTGATGGGGTGCTTGGTGCCATGGTTTAGTTGTTTAGGTGGGTTGGATTGGTTGATGGGTTGGACGCGATGATCTTGAAGGTCTCTTCCAACCTGGTKTATTSTATTGTATT
>CR1-J3_Pass-cAur_m#LINE/CR1
TGGGAGCAGRTGTTRGTCAGNTNGAGGGCAGAAGGGCWCTGCAGAGRGACCTCGACNGNCTGGACAGNTGGNCMGAGTCCAAYSGGATGGCATTYAACAAGTCCAAGTGCCAGGTGCTGCACTTTGGCCACNNCAACCCCATGCAGAGCTACAGGCTGGGGTCWGAGTGGCTGGAGAGCTKCCAAACAGAGAGGGACCTGGGGGTGCTGATCGACASCWGCCTRAACATGAGCCAGCAGTGTGCCCAGGTGGCCAAGAAGGCCAAYGGCATCCTGGCCTGCATTAGGAWTAGTGTGGCCAGCAGGAGCAGGGAGGTCATTGTGCCCCTGTACTCTGCNNTGGTTAGGCCACACCTTGAGTCCTGTGTCCAGTTCTGGGCCCCTCAGTTTAAGAAGGACATCGAGACACTTGAARGTGTCCAGAGAAGGGCAACAAGGCTGGGGAGAGGCCTTGAGCACAGCCCTNTGAGGAGAGGCTGAGGGAGCTGGGGTTGWTTAGCCTGGAGAAGAGGAGGCTCAGGGGTGACCTCATTGCTCTCTACAACTACCTGAAGGGTGGTTGTAGCCAGGAWGGGGTTGGCCTCTTCTCTCGCAACCAGCACCAGAACAASRGGACACAGTCTCAAGCTGTGCCAGGGGAMGTTTAGGCTSGAGGTGAGGAGAAAGTTCTTCACYGAGAGAGTCATTYGCCATTGGAATGKGCTGCCCRGGGAGGTGGTGGAGTCMCCGTCCCTGGAGGTGTTCAAGAGGGGATTGGACGTGGCACTTGGTGCCATGGTCTAGTCATGRGGTCTGTGGTGACAGGTTGGACTMGATGATCTTBSAGGTCTCTTCCAMCCTT
>CR1-J3_Pass-cAur_n#LINE/CR1
ACTAAACCATGGCACCAAGCACCCCATCWAGYCTCWTCMTGAACACCTCCAGTGAWGGTGACTCCACCACCTCCNTGGGCAGSTGATTCCAMTGGKCAATCACTCTNTCTGTGKAGAACTTCTTCCTAACATCYAGKCTAAACCTYCCCTGGCACAGCCTGAGACTGTGTCCTCTTGTTCTGNTGCTGGCTGCCTGGGAGAAGAGACCAACCTCCGCCTGGCTACAACCTCCCTTCAGGTAGTTGTAGAGAGCAATAAGGTCACCCCTGAGTCTCCTCCTCTCCAGGCTAAGCAACCCCAGCTCCCTCAGCCTCTCCTCATAGGGCTTGTGCTCCAAACCCCTCACCAWCTTTGTTGCCCTTCTCTGGACAMGKTCCAGSAAKHCAACATCWTTCCTAAACTGAGGGGCCCAGAACTGGACACAGGACTCRAGGTGCGGCCTAACCAGTGCNGNGTACAGGGGCAGAATGACCTCCCTGCTCCTGCTGGCCACACTGTTNCTGATNCAGGCNAGGATGCCATTGGCCKTCTTGGCNACCTGGGCACACTGCAGGCTCATGTTCAGCCTNCNATCAACCAGCACCCCCAGGTCCCTCTCTGCCTGGCNGCTCTCCAGCCACTCTGACCCCAGCCTGTAGCACTGCATGGGGTTGKTGTGGCCARTGTGCAGAACCCGGCACTTGGATGTGTTRAATCTCATGCCGTTGGACTCTGCCCATCTGTCCAGCCTGTCAAGGTCCCTCTGCANAGCCCMWCTGCCCTCTAGCAGATCAACNNCTGCCCCCAGCTTGGTGTCGTCMGCAAATTTACTGATGATGGACTCNATGCCCTCATCCAGATCATCAATAAAGATGTTAAAGAGCATGGGGCCCAGCACTGATCCNTGGGGCACACCACTAGTGACKGGCNGCCAGCCGGATGTGGCACCATTCACCACCACTCTCTGGGCTCNGCCCTCCAGCCAGTTCCTAACCCAMYGCAGYGTGCTCC
>CR1-J3_Pass-cAur_o#LINE/CR1
AGAMTCCAADAGCATGRVMTTSAASACMTCYAAGTGCMAGSTKCTGCACAWTGGYCACAGMAACYCCAWGYAGTGCTACAGGSTGGGGTCAGAGTGGCTGSAGAGCAGCCASRCAGAGAGGGACCTRGGGSTRCTGGTTSAHRGNRGGCTGAACATGAGCCTGCAGTGTGCCCAGGCVGCCAAGARGGCCAATGGCATCCTGGCCTGCATCAGGAACAGTGTGGCCAGCAGGAGCAGGGAGGTCATTCTGCCCCTGTACWCTGCACTGGTTAGGCCACACCTTGAGTCCTGTGTCCAGTTCTGGGCCCCTCAGTTTAGGAAAGATGTTGACTTGCTGGAACGTGTCCAGAGAAGGGCAACAAAGCTGGKGAGGGGTTTGGAGCACAAGCCCTGTGAGGAGAGGCTGAGGGAGCTGGGGTTGCTTAGCCTGGAGAAGAGGAGGCTCAGGGGAGACCTTATTGCTCTCTACAACTACCTGAAGGGAGGTTGTAGCCAGGTGGGGGTTGGTCTCTTCTCCCAGGCAACCAGCACCAGAACAAGAGGACACAGTCTCAAGCTGCACCAGGGGAGGTTTAGGCTGGATGTTAGGAAGAAGTTCTTCACAGAGAGAGTGATTGGCCATTGGAATGTGCTGCCCAGGGAGGTGGTGGAGTCACCATCACTGGAGGTGTTTAGGAGGAGACTGGATGGGGTGCTTGGTGCCATGGTTTAGTTGATTAGATGGTGTTGGGTGATAGGTTGGACTCGATGATCTTGAAGGTCTTTTCCAACCTGGTTTATTCTATTCTATTCTATTCTATTCTATTCTATTCTATTCTATTCTATTCTATTCTATTCTATBCTATTCWATTC
>CR1-J3_Pass-cAur_p#LINE/CR1
AGGTTGGAAAAGACCTTTGAGATCATCRAGTCCAACCTATCACCCAAYACYATCTAATCAACTAAACCATGGCACTAAGTGCCTCATCCAGATCTTCCCCTACTCAAATTTGGATCTGCTGCCCATGTACTAGGACCAGAGAACYRCTCATGGTAGACCAGTGCAGCTCTCCTKCTGGAAGAACTCTCTCTTCTCTTTACNNTTCTTTGTAACTCATGCACTTGTGCCTGKAGAACAAAGGGTTTCCATCTCATACTCMTATTGTCTCCATACTCACACAGGAGAGACCACAGGGTTCATTGTGGCATGGACTGTTCCTGTTTAGCTGTAGGAGAGTTCAACTCTGCCAGCTAAACCCATTGGCTCCTCTTCAGCCCAGCAGTGTCCTGGCTTCACACAGCCTGCTCTCAGAAGCAAGCCCCCTCCCNCACACACAGATGGGTGGGAAAACAACCCCMAAAAAMMCCCTCTRGGCTGAGATAAAGAGTTTGCTGAGATGNTAAYACTATACAATTACCTTAGCAGAAGGTGTGTGGGKNTTTTTTGTTTATTGAACTTAATACTGGCCTATCAAAATCATGTTTGGGTTTGTCAATAAATTATCTAATATCCAAGAGKAGTGGAACATCCTGAAAGTAGCCATATTAAGCATCYAGCAATCACTRAAAGTCAATAATTCMTATTTGAATATTATTTTAATATCCATTCTTTCTCAACAACACTGGTTTCACAGTCTGCCCCTTTTCCACCCCACCMNCNCATTTYCCCCCNTTTTCCCCTCAAATCCCAGAGCACCTGGGCTCTGTTGGAGTCTCCTCCCACCCCAGGTGTGGCCACTTTGCCCTCCCCACCCACTCCCCTTTTTAATCCCCYCCAGGAAAGGCAGAAGCCCYAAGCTGAGCCCATCTGGGCTGAGGGATCCTCCTCTCATCDCTGGTGAGTGCCCATGGTGCACACTGGGTGATGGTGGTGGTGACAACAAAGGCCGGGGGGCCTGGTGGCCCCCCGGTTGKTAGGG
>CR1-J3_Pass-cAur_q#LINE/CR1
CCTGAAGTCTGCCCTCCGGAAGTCCAGAGTGGAGGTCTTCTTGCTGCCCCTCTTAGCTTGGCTGAATACMGAAAAYTCAATTATCTCGTGGTCACTGGTGCCTAAACACCCTCCGACCACCACATCACCCACCAGCCCTTCCCTGTTGGTGAAGAGGAGGTCAAGCAKAGCCTTACCCCTGGTAGGCTCGCGCAGCACCTGGGATAAGAAGCTGTCCTCCATGCACTCTAAGAACCTCTTAGATTGCCTCCTTTCTGCTATGTTGTGATCCCAGCAGATATCAGGCAGGTTGAAGTCACCCATGAGAACAAGGTCAGGCGATCTTGAGACAGCCTTAAGCTGCCTATAGAATGCTTCATCAACATCTTCCTCCTGGTTGGGTGGTCTATAACAGACTCCAACCAGGATGTCTGCCCTGCTGGTCTTCCCTCTAATTCTCCCCCACAAGCACTCAACCCGATCGTCCCTGATCTCTAGCTCAACGGCATCAAGTGCCTCTCTGATGTACAGGGCCACCCCTCCACCCCTTCTTCCTTGCCTGTCTCTCCTGAAGAGCCTGTAGCCATCAATTGCAGCGCTCCAGTCATGCGAGTTGTCCCACCACGTTTCTGTGATGGCAACTACATCATATCTTTCCTGCTGCAACAAGGCTTCCAGCTCCTCATGTTTGTTGCCCATACTTCGTGCATTAGTATACATGCACTTCAGCCGGGCTGCTGGTTTCGCCCCTGACTCCAGCTTACCACCCTCAGACTCCTGTCTGGGGGGACTGGTTTCAGCCCCTTCCCCCTTCGAAGCTAGTTTAAAGCCCTGTCAATGAGGCCTGCTAATTCCCTTCCCAGAATCTTTTTACCTTTGGGGGACAGGCCATTCTCATGTACTGTGACCTTCCCCCTCCTCTGGGACAGATGTACTCCATCTGTTACCAGCTGACCTGCTGCAGTAGAAAGTTTTTCAAGATTGAAAAACCCAAAATTCTTCTGACTGCACCAGCCTCTAAGCCACTTGTTGACTACAGCTGCTGTCCTGTTCCTTCTTGTATTCCCTCCTGCAACTAAGGGTATAGACAAAAAAATTATTTGTGCACCTGACCCCTCCACCAGATCCCCCAGGGCCTTGAAGTCATTCTTGATAGCCCTGGGAGTTCTGGTTGCAACATCATCATTCCCTAACTGCATAACTATTAAGGGATAGTAGTCAGAGGGCTGCACCAGACTAGGCAGCCTTCTGGTAACATCGCTAACTTGAGCTCCTGGGAGACAACAAAGTTCCCTGTGAGTAGGGTCTGGCCGACATATGGGGCCTTCTGTTCCCCTCAGGAGGGAATCACCAATAACAATTACCCTCCTCTTTTTTTTAAGGGAGCAAGTCTTGATGCCAGGGGAAGGCTGCTTCACCTTGGGCTGCTTCACCTTGGGCTGTTTTGCCTCAGGGAAAACCCCAGCTGGTGTGTCCTCCTGCATTAGAATCACCTCCCCCTCGACCTCCAGTGCCCCATACTTGTTTTCCAAGGGCAGTGGGGAAGGTGAGGGGAGGCGAGGAGGTTTGAATTTGTGTCTTTTGAGAGGAACCTTCATCCATTCCCCTCTGTTTTTTGGATAACCAGCCTCTGCAGGGGGAGCCTGCAGAGCCTGGTTACTCAAGTTGGTCTCCCTTCTACAATCCCTGACATCTCTAAGTCTAGTCACCTCATCCTTCAATCTGGCCACCAGGTTAAGCAGATAGTCGATCTGCTCACACCTGGTGCAGGAGTTGTCCCCACTACCCTGCATCTCAAGTGCCAGGCTCCAGCACTCTCTGCAGCCATATGCCTGGACACCCACCTCTTGCTTATGGCACATGCCTACCTGCTTGTATTCCCCCTCAGTCTGAGTCGAGACTGATTTTTTGAAGGAGCTATTGCGGCGCGTTCCCACCATGCCTGCCCTGCCCGCCTGACCTGCKGGACAAGATTTAGAACAAGTGCGGCGGCGCGTGCCGAGCGAGTGAACA
>CR1-J3_Pass-cAur_r#LINE/CR1
CTTTGCAGAGGGACCTTRACAGGCTGGACAGATGGGCAGAKTCCAAGGGCAKGAGATTGAACACATCCAAGTGCCRGGTTCTGCACATTGGCCACAGCAACCCCATGCAGTGCTACAGGCTGGGGTCAGAGTGGCTGGAGAGCAGCCAGGCAGAGAGGGACCTGGGGGTACTGGTTGATRGTAGGCTGAACATGAGCCTGCAGTGTGCCCAGGYRGCCAAGAGGGCCAATGGCATCCTGGCCTGCATCAGGAACAGTGTGGCCAGCAGGAGCAGGGAGGTCATTCTGCCCCTGTACWCWGCACTGGTTAGGCCACACCTTGAGTCCTGTGTCCAGTTCTGGGCCCCTCAGTTTAGGAAAGATGTTGAGTTGCTGGAAGGTGTCCAGAGAAGGGCAACAAAGCTGGGGAGGGGTTTGGAGCACAAGCCCTATGAGGAGAGGCTGAGGGAGCTGGGGTTGCTTAGCCTGGAGAAGAGGAGGCTCAGGGGAGACCTTATTGCTCTCTACAACTACCTGAAGGGAGGTTGTAGCCAGGTRGRGGTTGGTCTCTTCTCCCAGGCAACCAGCACCAGAACAAGAGGACACAGTCTCAAGCTGCRCCAGGGGAGGTTTAGGCTGGATGTTAGGAAGAAGTTCTTCACAGARAGAGTGATTGGCCATTGGAATGTGCTGCCCAGGGAGGTGGTGGAGTCACCATCACTGGAGGTGTTCAGGAGGAGACTKGATGGGGTGCTTGGTGCCATGGTTTAGTTGATTAGGTGGTGTTGGRTGATAGGTTGGACTCGATGATCTTGAAGGTCTCTTCCAACCTGGTTTATTCTATTCTATTCTATTCTATTHKATTCTAWTCTATTYTATTCTAT
>CR1-J3_Pass-cAur_s#LINE/CR1
AGAGATATGTTAGGTTCCATGCCTGTAGGCCTTGCCCCTGCACCCCAGGCAGTGTCCCCAGCCAGCTCCTGCAGAGCTTGGCACCGGCATTCACCTTTCTGAACCTCTGCTGCTGCCTCCTCCTCCTCCATCTCCTCCACCTCCTCCATCTCCTCTATCTCATGCTCACTGCACTCTTGCTCAGGAGCTCTGAGGGCCTGCAAGAGAAGACACAGAGATCTGTGCCTGGCTCTGCTCCTTGCTCCTACAACGCCACACTGCAGCTGGCAGAGCTCCTGTGCTGGGGCTCTCCTGTCTCCATCTGGGGCAGAGATCTGGGTCCCTGCAGCCCTGGGCACTCCCGGGAGCAGCTCTGGCATCTGCCCGGGCAGCCTGCCTGGCACAGCTCTGGTGGTGCTCTCTTGCTGCCAGGGACCCTCCTGCACTTCCCAGTGCAGCAGACACCCGTGGTTATCCCGCTTCCCACCCGGAGATCACCCTGCCAGCCCACCCATGGGACAGCAGGGCACAGGGGACAGTGCCAAGCAGTGGCTCACCCACCTCTGTCAGTCTTGGGGCATAGCTGACTGCTGCCCACAGCAGGGTCACTGCCAGTGCCACAACCATTTTGGCTGAGCTGGAAGAGCCCAACCAAAGCATGACAAAGGCAGCAGCTCAGGACCAGGTGTCATGCCAGAGCCAGGTGTCATCACTGTGCCAAGTGTCATCTTATGGCCAGGTGTAGTGTCAGGGCCAGATGTCATCTCTGGGCCAGGTATCATCTCAGGGCCAGGCGTCCTCTTATGGCCAGGTGCCATCTCAGGGACAGGTGTCATCCTTTGGCCATGGATCTTCTCAGGGCCAGGTGTCATTGTAGGGCCAGCTGTCATCTGCAGGTGAGGTGTCAACTCTGGGCCAGGTGTCATCTTANNNNCNNGNNTCNANNGNNNCATCNCTGGACATCTATCATCTCAGGGTGAACTGTCATCTCATGACCAAGTGTCATCTCAGGGCCAGGTGTCATCTNCTGGACATCTATCATCTCAGGGCCTGGTRTCATCTCAGGGCCAGGTGTCATCTCAGGGCCAGGTGTCATCCTTGGGGCCCAGCCCGGCCTGGCCCCGGCCCCAGGCCATGCTGCTAGTCGTCCTCTGGCACTGACAGGCAGCAGGCACAGAGGAAGGCCTTGCGTGCCCTGCTCAGCCCCTTCCGCACCCTCCTGGAGAAGCCTGACCTGCGCCGGCGAGCTGGGGCCCGGCTGGGGGCAGCTGGGCTCTGCCCATCACGCCTGAGGGCTTCAGGCAGTGCCTCCTCCGCAGCCAGGGGCTGGGCTGTGCCAGTGGCAGCAGAAGCATTTGCTTCCTCTTCTGCCTCCTCACCGCCTGGGGGCACGGCAATGCCACCTTCCTCTTGGGCACCATCTTCCTCCACACCTGCAGGCTTCCTGGCTCCCGGACATGCTGGACGGGGAGAGCCCTTCTGCATGTCTCCAGCCGGGAAAAGCCCTGCGAGAAAGACAGTGACCACGTCAGCATGGCCTTGGGGAACATCTTCTCACTCTTCCTTCTGTGCCAGGGGCCTGACTCTGCCCTCTGCAGTTCTCCCTCTGCCTCTGCCCTCATCATCCACTGCTCGATCAACTTACTGCCAGCATCCGGGATGTTCATCTCCTGCTCATCCTGCTCCTCGGGGGTGTCCTGTAGGGGCTCTTGGTCCCTCTTCTGGCCTGGCCGCCACAGCTTGTCCTTGACCTGCCAGAGCCAGGTCTGAAAGGAGAGAGGGAGGGTTTGTCAAGGCAGCCTGGCTCCCACCTTACACTGAGACGCTCCTGGCCATGGNCCCCCATGTCCCCCAGAACTCCACCCCATCCCASCTCCCCACCTCACCCCATCCTGCGGTGCTATGGTCGCTTACCCATAGCCAGGCGGCCAGACGCAGTGCCCAGCACACAGCAAGGTCCAGCACCATGTACCCCAGCACCACAAGCAGGAGCTTGGGGTTCAACATGCTGTAGAAGCTCAGGTCACACGCTGCGGTGTGCTCCTCAGACTCCATCGTCAGCAGCCACGGGATCCCAGCACTGCTGAGAGCTGGCAGGGGCTAACAGACTGCGCTGTCGACGCCGACTGCCTGCTCCCACCAGCCTGCACCTCCTTTTTATAGGCTTTGGAGGGTGGGGCAGGTCCCATGGTGCCKTTATGGGGCAGAGTTTCCATGGTGCCATTATGGGGCAGGCTGTTGCCRTGGTGATGCYCAGCACCACCCCRGCCCTTCCCTGCCAGATGCAAGGATCTCAGGAGGCACTGGGGTGTCCCTCTGGAAATCAGGGGGGGCATCTGATGGTGCCCAYGTTCTGCAGGCCTGGGGACCMTGGAGGTGCTTCAGAGGTGARCTAGAAGAGGAGGAGGAAGATGMTCTGGASATAGAAAGGGTGGAGAGCAAAGACCCCCACCCCTGGCCCTCATCTAACAGCCGCCCTGGCCTGAGCTTTGGACTTCCTCCCTGCTGAGCATAGGCCCCAGCTGCTGCTGCTGCTGNTGNGGTGGTCCTTCTCCAGGACCTCTGCCAAGATGTGGGCTGGTAGCAGTAAGAGCAAGGAGCAGGCTGTGGGGCTGTGCAGGGCTGCTGTCTGSYAAGCCATAAGAAAGCCATCAGGGGCCTTCATCCCYTCTGCWGTCACAGGAGAGAGGCTCTTGCAGAGCTGCTGGCTTGGCCTCTTGTGGCACTGACAGGGGTGGCAGCCCTGCTCTGCAGGTCACCAGCTGCCMCCTCTTCTGCCTCCTCTCTTCCTNGGTGCACTCCNANNCTGTCTTCCCCTTGAGNAACATCTTCCCWCTCCTCCCTGCACAAGGCCTTTGGTTCCTTNTCNGGCCCTTCCAGTTCTGTCCCTCCTTCTGCTCCTTCTCACTGCTTGCTGNGACCATTATGGCCTTCGTGCTCCAGCCAGTCCTCCATCTCCCTGGTGTCCTTCAGGCCTTCCAGCTCTGTCACCTCTGGCTGCCACAGCTTGTGAAAGACTTCACCCCTCACTAAGTTTTGTGATCAGNGGGGTCTTTATAGAAAACWGGAGGAGGAGGAAAGTGGCCTGTGGATGGTCCCTTCAGTTCTAGTGCTGGGTTACAGTGAGTGCGGGTTTGAAGAGAAGAGCAGCCAGGGGATGCAGCTGTAGATGCTGAGCTGTTCTATAAGAAGCCATCCAGGATGGCATTAGGAATGTGGGATAAGCCTGGCACCCAGTGATCCTCTTGCTTTGCCTTGGAGAAGGAGCCAAGGGAAGCTTTGCAAAGCTGTTGCTGAGCTGGTGGCCCAGGGCAGAGGTCTGTTTCAAGTTCTGTGAAAAGGAAGAGGATGACCTTGGTTTAATGAGCGCACCCCAGCGTTGCTTGGGGCCTTGAAAGGAGGGCACCATGGGCCTAGGGGGAATGGCAGGAGAAACAATGGGGGGGGGCTGGTTATCAGGAGAAGGGATGKGGKCTGGGAGCAGAAGGGWTAACCCCAAGAGCAGGTCAGGCAAGAGGCAGAGAGGGAGNAAACCTGTGTCAAGGAATTGTTTCTTTTTCAGTTTACTGGAGCCAAAGGCTTAAGCACTGGGCTGGGCTTAACCCAGCACNAAAACTTAGCTCCTGGATACCAAATGGGGCTTGGGTGAAATCTGTTTGCCACGATGGCTTGTGTTACAGCTTGGGCGGTGGTTGTGTAGTGTAAGGAGCATGAACATTGAACGTGGGTATGGNGNCCTCAAAGCCCAAAGCCTCAGGGCAATGGGGAAGGTGATGCACGAAGCCATAGAAAAGTTCTGGTTGGACCTTTCCAGGTGGATTAAAGCTGATGTAAAANGCTCCGGGTTTAGGGTNGGGTTTGCGTGTCTGAGTGGNATAAAGGCTGCCTGCTCCCCGAGGGCTTCCAAGCAGAGTCTCAGTTTTCTTCCATAACCAAAGGGCAGGTCTCAGGNCCCAGCAGCCCCAGCATTCNACTCCCCTGACNACGGCCATCTTCGCCCCCCATCTCCTGAGCCAAACCGGNCACAGCTGGAGGAAGGTTGCCAGTNTTATTTTCACATCCTTCTTTGTTCATCTGTGTAGTACTTNGAGCCAGTCCCTAGCTTGGATACCAGTAGGAATTAGGAAAACTCCAGAGACANTTGAGTACAAGATAACTAAAAAAGAGATTGGATATAAAAGGATACACAGGSTAAAATCACTCCATTGGTGTGCTGAAAACCTCCTATCTAGCGGCAGAAGTTGGTTGCTCTCTTTTTGCCTGCTGGCTGTGGGAAGCTCACTCTGCTTTGATGCTCTGGATGAGGGNATTGAGTCCATCAGCAGTAAATTTGCAGATGACACCAAGCTGGAGGCAGGAGTTGATCTGTTAGAGAGTAGGAGAGCTCTGCAGAGGGANCTTACCAGGCTGGACAGATGGGCAGAGTCCAACAGGATGGCATYCAACAAGTCCAAGTGCCAGGCDCTGCACTTTGGCTGGAAGAANCCCAGGCAGTGCTACAGGCTGGGGTCAGAGTGGCTGGAGAGCAGCCAGGCAGAAAGGGACBTGGKGTACTGGTCGATAGTAGGCTGAACATGAGCCAGCAGTGTGCCCAGGTGGCCAAGAAGGCAAATGGTATCCTGANCBGCATCAGGAAGAGCGTGGCCAGCAGTCCTTCTGCCCTGTACTCAGCACTGGTTAGGCCACACTTTGAGTACTGTGTCCAGCTCTGGGCCCCTCAATTTAAGAWGGACATTGAGCCTCTTGAACATGTCCAAAGGAGGGCAACAAAGCTGGGGA
>CR1-J3_Pass-cAur_t#LINE/CR1
TGAACACATCCAAGTGCMGGVTTCTGCAYATTGGYCACAGCAAYCYCATGCAGTGCTAYAGGYTGGRGTCAGNGTGRCTGGAGAGYRGCCAGGNAGAGAGGGACCTGGGGGTACTGGTTGATGGYAGGCTGAACATGAGCCTGCAGTGTGCCCAGGCAGCCAAGAGGGCCAATGGCATCCTGGCCTGCATCAGGAACAGTGTGGCCAGCAGGAGCAGGGAGGTCATTCTGCCCCTGTACACTGCACTGGTTAGGCCACACCTTGAGTCCTGTGTCCAGTTCTGGGCCCCTCAGTTTAGGAAGGATGTTGACTTGCTGGAACGTGTCCAGAGAAGGGCAACGAAGTTGGTGAGGGGTTTGGAACACAAGCCCTATGAGGAGAGGCTGAGGGAGCTGGGGTTGCTTAGCCTGGAGAAGAGGAGACTCAGGGGTGACCTTATTGCTCTCTACAACTACCTGAAGGGAGGTTGTAGCCAGGCAGAGGTTGGTCTCTTCTCCCAGGCAGCCAGTACCAGAACAAGAGGACACAGTCTCAGGCTGCGCCAGGGGAGGTTTAGGCTGGATGTTAGGAAGAAGTTCTATACAGAGAGAGTGATTGCCCATTGGAATGGGCTGCCCGGGGAGGTGGTGGAGTCACCATCATTGGAGGTGTTCAGGAGGAGACTTGATGGGGTGCTTGGTGCCATGGTTTAGTTGTTTAGGTGGGTTGGATTGGTTGATRGGTTGGACRCGATGATCTTGAAGGTCTCTTCCAACCTGGTGTATTSTATTGTATTGTATTSTATTSTATT
>CR1-J3_Pass-cAur_u#LINE/CR1
TCTTGGCTGCCTGGGCACACTGCAGGCTCATGTTCAACSTMCWATCAACCAGCACCCCCAGGTCCCTCTCTGCCTGGCTGCTCWCCAGCCACTCTGACCCCAGCCTGTAGCACTGCATGGGGTTGKTGTGGCCAGAGTGCAGAACCCGGCACTTGGATGTGTTSAATCTCATGCCCTTGGABTCTGCCCATCTGTCCAGCCTGTCKARGTCCCTCTGCAAAGCCTCTCTGCCCTCCAGCASATCAACTCCTGYCCCCAGTTTGGTGTCSTCCACAAWTTTACTGATGATGGACTCMAKGCSCTCATCCAGATCAKCAATAAAGATGTTGAGGAGCATGGGGCCCAGCACCGATSCCTGGGGYACACCASTAGKGACWGGCSGCCASCCAGRKGTGGCAYCATTCAC
>1_MUn-I-cAur_a#LTR/ERV3
CCTGAAGCGCMGCAGCCCCYGGAGCGGGGAACCTTTGCCAGGGGCTGNGCTTYGTGCACCAAGCGGCAAAAGCCTCTGAAGTTTCCCCTGGGAGGCTCCAGGASCTTTGTGCTCTGGGAGAAGCAGCAACCCCGCGGCACRGCCACSMGGCCGGCGCCATTCTCTATTGCCTTAGCAGGGCACAGCCGTGCCGCGCTGTCAGGACTCTYAACACATCCCCAGGGAAAGATTTCATGGCRCTCTCAGCTCCTGAGGAAGCCAAACCTTTGCTTCAGAGGATTTKGGTTAAGGGAGTGCTGAAACTGTCCTGSGTTGAGGGTTTGCCGGTCACCGACAAACCCCTCCCCCACTGCTTTCCCAAGCAGTTTCAGTTCTAAATCCTATCACTCCTTTGGTTGGGCTGAAGTGCCCAGGCACAAACYTTCTGTAGAGGTGGTTCCCCCAACCCAATGCTGCTGCCTGTGAGTAGAAACTCAATCCCCTGCTGCATAGTTTGTGTATAAATAGACTACTAATAGATCTGTTCATTGCTATCCTTGCSGCTCATTCCCGAGGGCACATCTACAACACTCCTGTAGGGACAAAGAAGCCTWCAAGGAAAGCAGCTGATCCTGCAAAGGACCAGGAGGGATCAGGGTCCCCATGGGAACAAGAGAAAGAGCCAGGGCTGCTGGCTTGGTTCTTATCTCTGGCTTTGGAAGATGGCCAAGGACAAACAGTGGATGAAACAAGCAGCAGGCCCCAGCAAGGCAAAGGAAATCTCTGCTCCTCTGTCCAGGCCTGTGTTTCAGCTGTGAAGGAACTGTCCCAGGAGTTCCATCAGCTCCAGAAGAAGTTTTTATTCCCCACCTGTACAGTCCTGTGTTTCAGCCATGAGSAGCAGCTGCTCCCCTGTCCAAGGGAGAGAATCTGGGAGGCACACACCACAGCACACCCTCTGCTTTACTTGTGTGACCATGGGGAGGACGTGAGGAAWTGGAAGGGAAAACCCAATCCAGTCCTGGCTGCAGGAGTCTGTGACTTCCAGGGGAATTGTCCCCCCAGAGATGCTGCCTCAGTTTCCAGTGGGAAATGGCCTAAGARGAGCAGGGAAGCTRAAACTGCTTCTGGTCCTCCTGAAGGGACTCCCAAAGCATCTTCACAAGATGCAAGGGACCCMAGGCAGAATTAGAGGGACTCTGCCTCCAACCAGATGAAGGGGAGAGACAAATTGGTTTGTTGGACCACACAGAACCAATGGCCTGGCAAGTTGAACCCATGAGAGGATAAAGCTTTAGCAGCTGCAGGTGCCCAGAGTGCTCTGACACCATCAAACCAYGAGGGGTGGAACCCATCTGTGTTTCTGGTGTGACAGGAGGATCCCCACACCTGGATGTGTTGGAAGCTGAGTACTGGGATGCAAGCCACAGTTTGCTTTCACTTGGAGGCNTGGAAGGAGTCACTGGACTCAATTGCCCCAGAGGTGGAAACACAGCCCCAGCATTTGCAGCATTTGGCCTGGGCATGGMCTGATCCAGACTGTGCTGGAACAGAGTGGAGCTGCAGAGCACCTGCAGTGAGCAGCCCTCTGGGTCCTGCAAAGCCACCTCCTGTGGAGTGAGAATGGACAGTGCCTGAGGTGTGCTGCTGATTGCTGCTGGGCATGGTGCAGGTGGCCCAGAATGAGGGCTGGGGAATATCAAAGGYTAAGNTGAAAATTTGCTGCCATTACTCCACACCACCCTGCCTCATGCCACCTTCACAGGGACAGTGCTGGCTGGAGCAAAGCACTACAGGGCCTGAAGTTCAGATTGCAACATGAGAGGCTTCCTGTTCCGGTTGCTGCTGTTGGGTTCTGGCTCTCAGGTGCTGGCTCTTTGCTGAGGGGGAGGGCTGTAGGGGTTGAACTCCTGGCTGCTGCTNGCTGCTGCTGCTGGCTGCTGTKCTTTCTGCAAACAGCCTCAGGTCAGTGTGCATKATGGGATCTCCTTTGGATTCAACTCTTTTGAGCTTATCTCAAGTCCTTATCTCAACCCAGAGGGTTTTTTGACTYGTGTGTGTGTTATTTTCCCCTCACTTCTGTTTTGGGGGGGAACAGGCAGCTTAACCTCTTCTCAGCTCTTCAACCTGTTCCAGCCCCAGAGTGGAAAGCCAACAGAAGCTTTCTGAGTTCTTCCAAAGATCTCCATGAGATTCCCCC
>1_MUn-I-cAur_b#LTR/ERV3
CCTASAAGGAMAGCAGCTGATCCTGCAAAGGACCAGGAGGGATCAGGGTCTCCATGGGAACAAGAGAAAGAGCCAGGGCTGCTGGCTTGGTTCTTATCTCTGGCTTTGGAAGATGGCCAAGGACAAACAGTGGATGAAACAAGCAGCAGGCCCCAGCAAGGCAAAGGAAATCTCTGCTCCYCTGTCCAGGCCTGTGTTTCAGCTRTGAAGGAACTGTCCCAGGAGTTCCATCAGCTCCAGAAGAAGTTTTTATTCCCCACCTGTACAGTCCTGTGTWCTGCAGCAGCTGCTCCCCTGTCCAAGGGAGAGAATCTGGGAGGCACACACCACAGCACACCCTCTGCTTTACTTGTGTGACCATGGGGAGGATGTGAGGAAWTAGAAGGGAAAACCCAATCCAGTCCTGGCTGCAGGAGTCTGTGACTTCCAGGGGAATTGTCCCCCCAGAGATGCTGCCTCAGTTTCCAGTGGGAAATGGCCTAAGAGGAGCAGGGAAGCTAAAACTGCTTCTGGTCCTCCTCAAGAGACTCCCAAAGCATCTTCACAAGATGCAAGGGACCCAAGGCAGAATTAGAGGGACTCTGCCTCCAACCAGATGAAGGGGAGAGACAAATTGGTTTGTTGGACCACACAGAACCAATGGCCTGGCAAGTTGAACCCATGAGAGGATAAAGCTTTAGCAGCTGCAGGTGCTCAGAGTGCTCTGACACCATCAAACCATGAGGGGTGGAACCCATCTGTGTTTCTGGTGTGACAGGAGGATCCCCACACCTGGATGTGTTGGAAGCTGAGTACTGGGATGCAAGCCACAGTTTGCTTTCACTTGGAGGCNTGGAAGGAGTCACTGGACTCGATTGCCCCAGAGGTGGAAACACAGCCCCAGCATTTGCAGCATTTGGCCTGGGCATGGCCTGATCCAGACTGTGCTGGAACAGAGTGGAGCTGCAGAGCACCTGCAGTGAGCAGCCCTCTGGGTCCTGCAAAGCCACCTCCTGTGGAGTGAGAATGGACAGTGCCTGAGGTGTGCTGCTGATTGCTGCTGGGCATGGTGCAGGTGGCCCAGAATGAGGGCTGGGGAATATCAAAGGYTAAGWTGAAAATTTGCTGCCATTACTCCACACCACCCTGCCTCATGCCACCTTCACAGGGACAGTGCTGGCTGGAGCAAAGCACTACAGGGCYTGAAGTTCAGATTGCAACATNAGAGNCTNCCTGTTCCGGTTGCTGCTGTTGGGTTCTGGCTCTCAGGTGCTGGCTCTTTGCTGAGGGGGAGGGCTGTAGGGGTTGAACTCCTGGCTGCTGCTNGCTGCTGCTGCTSGCTGCTGTNTNCTTTCTGCAAACAGCCTCAGGTCAGTGTGCATGATGGGATCTCCTTTGGATTCAACTCTTTTGAGCTTATCTCAAGTCCTTATCTCAACCCAGAGGGTTTTTTGASTCGTKTGTGTGTTATTTTCCCCTCACTTCTGTTTTGGGGGGGAACAGGCAGCTTAACCTCTTCTCAGCTCTTCAACCTGTTCCAGCCCCAGAGTGGAAAGCCAACAGAAGCTTTCTGAGTTCTTCCAAAGATCTCCATGAGCTTCCCCCTACACCCTCCAAAGATCCCAAAAGTCAATCCTAGGACCATCCAAATCCCAAACAGCTAAGATCACCTGAAAGCCCCTGAAGAATGCCTCTGAGATGCCCCTCAAGACTCCTCTGAGAACCTCATTTTCCCCTCCCTGAACTGGGCACACAGCTCCACCCCATCCCTTGGGAGCAAATGCCCCCCAAATTTGGGCATTGWGSCAGGGATATCTGMAATAAAAGCAAACAGACAGGATCTGGGTAACTTTTCGGTTTTATTGACACTATTGGTCAATGGACAGAGAGGTTCTTACCCCAGGGAGACACAAAGCTTTGGGGAAGAACCAGACTGACCCTGGCAAAGCCCTGCCCAGCTCCACTGGGAGCTCCAGCTGTGCCGACTCAGCACTRTAATTGTTCTCATTAGCAATAATTGGTGTTCAGAAGGGCAGGAGGTGTTTGTTGCTGCTGGTACCCCCAGTCCCTGAGAWCTGSAAAGGAAAAAGAGATGATTTTGGTGCTGGAAAGGCCCTCTCGGAGGGGTCACGATTACACAATAGATTCTAGGTGGATTTATGCYTCTCCTCCAGTGCAGGCTGCTCTCTGGTGTGGGTGCAGCGGTGCTTGTTGAGGTTRCCCTTCTGGGTGAAGCTCTTCTCGCAGKCAGCACAGGTGAAAGGCTTCTCACCAGTGTGGGTGCGGCGGTGA
>TguLTRK5e-cAur#LTR/ERV3
GTGACAGGGGGACTGTGCCACCACAATCTGCTCTGTGACWTGAGTRCATYTCTCTCAGCCAGAGAGTGGCTGTGTGGTTGCCTCCTGTCTCTGTGCCTCTCAACAGAGAATGTCATCATCCAATCAGAATGGGAAGGACATTTGGTGGTTCCTTAGCCTCCAAAGTCTTCTTCAATGCCATTCAGTGACACAAAGCACACAGGAAACNNTGATGATGGGAAATGTCTGCAGCAGTGTGACTTGCTTGGCCATCCTCCTAACTCTAACTGCAAACCAATGNTGAACAGCAAGCAGAGAGCAGAGCAGGCAGGAAAATCACAGTGGCTGTGCCACCAGGGGCAGTGTCCCAGCTGCTGCTGGACACCAYCCAWACAGCACTTCCCACCAGCAGTGTTCTCCACTCCTCTTGGYTACTTYTAGCACTCAATGGATTGCTTCAGTGTCARGGTGGKCTCTGGGCAGAGKCTTTTGTCCTGCTTCTCCTGGTRGTTGCAGCAGGCTGATGGAATCAGGGTGCTGGAGGAGCTGTTGGGTTGCAGTGAAATTCTTYCCAGTGGGTGTAGGTTGTAGCTAACCATNCAACATGTGAGCAAAGACACATCCTGGTGAGYAGTSATTGGCACAGAGAATTTCCAATCACAGCCAATGATTRCAGAGACATCACACAGACAGAAACTGAACTGATTGCTGTGGTGGTGTTCCAGAKCTGTGACAAATATTGTGGTGCAGGCCCAGCTGGTTCCAGCACCATGAGCTGAGAYACAAACTAACAGAGCAGTTGAGAGCAGGACCAGGGCTGCAAGGGGAGCCAAGGGGCCCAGACCTGCAGAGCCTGTGGCTCCTTCTTCAGGCAGAGGTGAGTGTTACAACTCCCCTTTCCCACAGCCTATCCCCACTCAGCTCACTGTTGCATCTGGATTTGARCAGGGGCTCTTCTCCCCACTTGCCTTTCCCAYCTGCTTCAAGGATGCAGCACTTGGTTCTTTTTCACTCCCARCCTTTCTCANATGGTTTGGTTGCACATYTCATCYCCTCCAGGGCCTCACACAGACATGAAGGCCATCTCAACATTTCATTACCACTCCCTTTTTGGGTTCCTATAGATTGRTTCTATWGCAAACTAAGTCATTGATCARCATGGATCTACAGGCTGMAGCCCARKCTCTGGTTGTCNCTCTGGGCTGCAAGTGCTCACTGCTGGCTCCTVTTGAGCTTCCCCTCCACCAGCATCCMCAAGGCCTTTTCTTCATGGCTGCTCTCAAGCCAGTCCCTGCCCAGCCTATWTCAGGANCCATGTACATGGTSTMWSTKCACMGTGTCCTGWGGGGTGCATGGGGWTTGTWTTTRGGACTGTCCRTGGAACCCCAAAWACAAAACCCAKTYATGGGTTTGGTCATGGKGAAGTTACACCAASWACCTGAATYTGGTTGGGCTGTTGTGTTACAATCTTTGTGNTCTGGGTTGGTAGAATGGSTGTAGAAGATTCTCCTTTCATTTGSTTCCTGGTGAGTAGATCCAYTGACTCCCTGCATCCAGYCTGCATTTGCTCTTCTGCCATGGATTGCAGTTGAGCCACCTGAGGAGAGCTGCCCCAGCCCCAGGCAGCTTTGCTGTACCTTTCATTTCCATGGAAAMCAAGAGAGAGCTTAGCCTGCCTTGKTCTGTGGGGTTTCAGCACTTCCAGTGGATCCCAGCAGCAMCTGGTCCCMAGGAGCTTGTGCTTGGGCCHTGGTGAGTGTCCTTACTGCAAGGAGGAGGAAGAGAGGAGTGGGCAAGTGGNGTACATNTNCANGGAGTTGCCACTGGTGTCTNCCCAACTGATCCATGCAGTGAGGACAGAGTCTGTCTCANCACTGGNTTGGTGAMAAATCCAAAGCACAGCACCAGAGGAGCTGCTGTGAAGAAAAT
>TguERVL1_I-cAur#LTR/ERV3
GTGACAGGGGGACTGTGCCACCACAATCTGCTCTGTGACWTGAGTRCATYTCTCTCAGCCAGAGAGTGGCTGTGTGGTTGCCTCCTGTCTCTGTGCCTCTCAACAGAGAATGTCATCATCCAATCAGAATGGGAAGGACATTTGGTGGTTCCTTAGCCTCCAAAGTCTTCTTCAATGCCATTCAGTGACACAAAGCACACAGGAAACNNTGATGATGGGAAATGTCTGCAGCAGTGTGACTTGCTTGGCCATCCTCCTAACTCTAACTGCAAACCAATGNTGAACAGCAAGCAGAGAGCAGAGCAGGCAGGAAAATCACAGTGGCTGTGCCACCAGGGGCAGTGTCCCAGCTGCTGCTGGACACCAYCCAWACAGCACTTCCCACCAGCAGTGTTCTCCACTCCTCTTGGYTACTTYTAGCACTCAATGGATTGCTTCAGTGTCARGGTGGKCTCTGGGCAGAGKCTTTTGTCCTGCTTCTCCTGGTRGTTGCAGCAGGCTGATGGAATCAGGGTGCTGGAGGAGCTGTTGGGTTGCAGTGAAATTCTTYCCAGTGGGTGTAGGTTGTAGCTAACCATNCAACATGTGAGCAAAGACACATCCTGGTGAGYAGTSATTGGCACAGAGAATTTCCAATCACAGCCAATGATTRCAGAGACATCACACAGACAGAAACTGAACTGATTGCTGTGGTGGTGTTCCAGAKCTGTGACAAATATTGTGGTGCAGGCCCAGCTGGTTCCAGCACCATGAGCTGAGAYACAAACTAACAGAGCAGTTGAGAGCAGGACCAGGGCTGCAAGGGGAGCCAAGGGGCCCAGACCTGCAGAGCCTGTGGCTCCTTCTTCAGGCAGAGGTGAGTGTTACAACTCCCCTTTCCCACAGCCTATCCCCACTCAGCTCACTGTTGCATCTGGATTTGARCAGGGGCTCTTCTCCCCACTTGCCTTTCCCAYCTGCTTCAAGGATGCAGCACTTGGTTCTTTTTCACTCCCARCCTTTCTCANATGGTTTGGTTGCACATYTCATCYCCTCCAGGGCCTCACACAGACATGAAGGCCATCTCAACATTTCATTACCACTCCCTTTTTGGGTTCCTATAGATTGRTTCTATWGCAAACTAAGTCATTGATCARCATGGATCTACAGGCTGMAGCCCARKCTCTGGTTGTCNCTCTGGGCTGCAAGTGCTCACTGCTGGCTCCTVTTGAGCTTCCCCTCCACCAGCATCCMCAAGGCCTTTTCTTCATGGCTGCTCTCAAGCCAGTCCCTGCCCAGCCTATWTCAGGANCCATGTACATGGTSTMWSTKCACMGTGTCCTGWGGGGTGCATGGGGWTTGTWTTTRGGACTGTCCRTGGAACCCCAAAWACAAAACCCAKTYATGGGTTTGGTCATGGKGAAGTTACACCAASWACCTGAATYTGGTTGGGCTGTTGTGTTACAATCTTTGTGNTCTGGGTTGGTAGAATGGSTGTAGAAGATTCTCCTTTCATTTGSTTCCTGGTGAGTAGATCCAYTGACTCCCTGCATCCAGYCTGCATTTGCTCTTCTGCCATGGATTGCAGTTGAGCCACCTGAGGAGAGCTGCCCCAGCCCCAGGCAGCTTTGCTGTACCTTTCATTTCCATGGAAAMCAAGAGAGAGCTTAGCCTGCCTTGKTCTGTGGGGTTTCAGCACTTCCAGTGGATCCCAGCAGCAMCTGGTCCCMAGGAGCTTGTGCTTGGGCCHTGGTGAGTGTCCTTACTGCAAGGAGGAGGAAGAGAGGAGTGGGCAAGTGGNGTACATNTNCANGGAGTTGCCACTGGTGTCTNCCCAACTGATCCATGCAGTGAGGACAGAGTCTGTCTCANCACTGGNTTGGTGAMAAATCCAAAGCACAGCACCAGAGGAGCTGCTGTGAAGAAAAT
>TguERVK7_I-cAur#LTR/ERV2
CCACTGACAAATTGTAGGACTATTTTTCATTCCTTGTGGAAGCACAACCCAATGGTATCTCTGCAAAGGTTGTTGCATGTTAATGTTTGGAACTGAGAAAGCAAATTYAGGAGCATCATTTGGCTGTAAAGGAATGCTAAAGAAGCAGTCTTTTAGGTCAATAACAGTTAAATGCCAATATCGTGGTATCATTGTGGGTGAGGGTAGCCCTGATTGAAGGCTCCCCATATCCTCCATAACRTCATTAATCTTTCTGAGATCATGGAGCAAGCGCCACTTGCCTGTTTGTGTTTTGATGACAAAAATAGGAGAATTCCAAGGACTTGTGGAGGGTACAATATGCCCTTTTCCCAATTGCTCTGTGACCAGTTCTTGAAGTGCRYGAAGCTTTTCCAATGGCAGGGGCCACTGAKCCACCCAGACAGGGGCATTTGYTTTCCAAGTTAACTGAAGGGTGTCGCACACCGCAATGGCCCCCTCTAAAAATGGGTGTTCATGGTCATCCCCCATTGTGAAAGCACATCACGACCCCATAGCACCATAGGCACAGATAAAACAAAGGGTTTCACAGAAGCTATRTGTCCCTCTGGTCCCTGAATCTGAATGAAATTCAGGCTCTGATGACTTTCTCCAGCTCCCCCTATGCCTGCCAGCNCCTGAGATGCACTAGCYACAGGCCAGCGGGGGGGNCATTTAGCTTTAGAAATCACTGTGAYGTCTGCTCCAGTATCAATAATACCACTAAGCACTATGTTCTGCTGACCATACAGCAGGACACACTGACAGATAGGACGTTTTTGAGAGATAGTCTGTACCCACAGAATCTGTGGATCCCCAGTAGACCCGAATCCTCCTTTATTTCTTAAAGGTCCCTTTGCAGGGGGACGTTCNGATCCCAAGGGAAGCAATAAMAGCTGT
>Kronos_I-cAur#LTR/ERV3
TTCTGGGAATTGATTTTCTKAGAGAAGGGCGTTTCAAAGACCCTANAGGTTACAAATGGGCTTTTGGNGTAGCATCTGTAGAAWTTGATGGACAMAAWCWGAAGTTTTCTGTTAGACCTGAGCTTTCTGATGAATCTGCAGTTGTGGGACAACACAAGATNAGGACATTAAATTGCCGGTTGCTTCTCAGACTGTGCATCACAGACAATACAGAACCAACCRTGACTCTTTGTTGCCCATTCASAATCTGATTCGTCAGCTGGAGAGTCAGAAASTCATCAGCAAAACTCATTCCCCTTTCAACAGTCCAGTGTGGCCTGTGCGAAAGCAGAATGGAGACTGGCGTCTGACNGTNGACTACCGAGCTCTGAATGAAGTAACTCCACCTATGAGTGCAGCAGTACCAGACATGATGGAACTCCAKTATGAGCTGGAATCCAMWGAGGCCAAATGRTATGCTACCATAGACATTGCTAATGCCTTCTTCTCTATTCCCATAGCAGAGGAATGCAGGCCTCAGTTTGCTTTCACCTGGAGAGGAATCCAGTACACTTTCAACAGATTGCCAATGGGCTGGATCCACAGCTCCAGCATCTGTCNTGCAGTGATCCACNATGCTCTGGAGAAGGNGGTNCTCCAGAACACATCCAGTTCATCGANGATATCATSGTCTGGGGTAAAACYGCTGAGAAGTCTTCGAGAAAGGTAACAAANTCNTTGACATTNNTCTGAATGCAGGTTTKGCCATCAAGCGAGACAAGGTGAAAGGACCTACNNNAGAGATYCAGTTTCTGGGAGTGCGGTGGCAGGATGGACGCCKACACATTCCAGNGGATGTNGTAANAGAGTCTCTACCATGGCNAATCCCATGAACAAGCAAGAAACTCTATGTTTCTTGGGGATAGTGGGATTTTGGAGACTGCACATTCCTGGNTACAGTCAGATTGTGAAACCTCTGTATGATGTGACTCGAAAGAGAAACAATTTCCACTGGGGACCTGAACAACAAGCAGCNTTTGACCAGATAAAGCAAGAGGTAGTTCAAGCAATGGGTCTGGGACCTGTCCGAGATGGTCCAGACATTAAGAACATTTTGTACACGGCTGCAAGTGACAATGGTCCAACCTGGTGCTTGTGGCAMAGAGCTCCAGGTGAGACACGTGGACGACCTCTTGGTTTTTGGAGTAGAGGTTACAGAGGTTCAGAGGCTAATTATACTCCAACAGAGAAAGAGATTCTAGCTGCCTATGAAGGAGTNAAAGCAGCTTCTGAAGTGATTGGAACTGAATCACAACTTCTCWTAGCTCCCAGATTACCAGTTTTGAATTGGATGTTCAAAGGCAAGGGTTCCACACCACATCATGCAACAGANTCCACCTGGTCTAAGTGGATGGCTCTGATAACACAGAGAGCTCGMATGGGAAATCTTGAAAGACCTGGTCTNGTGGAGGTGATCTCAAGTTGGCCTGAAGGTACCAACTGCACTAAACCTCCAGAGGAGAGAGTAACTCGTGCTGAGGAAGCTCCTCCTTACAATGACCTTTCTGATGAYGAAAAGAAATATGCTKTGTTCACAGACGGTTCCTGTCGGCTTGTYGGGAACAAGCGAAGGTGGAAGTCTGCAGTGTGGAGTCCAACACGCCGAGTTGCAGAGGCAAAGGATGGAGAAGGAGAATCCAGTCAGTTTGCAGAGGTAAAAGCTGTCCAGCTAGCTCTCGACGTAGCTGAACGTGAGAGGTGGCCAAAGCTTTATCTCTACACCGACTCATGGATGGTAGCCAATGCTCTGTGGGGTTGGCTAAAGMACTGGAAGAAGAGTGGTTGGCAGAGAAAAGGAAAGCCYATNTGGGCAGCTGACCTGTGGCAGGACATTGCTGATCGAATCGAGAGNATTCCAGTGAAGGTGAGACACATTGATGCTCACATNCCTAAGAGCAAAGCTACTGAGGAACAGCAACACAACCATCAGGCAGATCTAGCTGCAAGAGTTTCTCAAGTAGACATGGACTCTGATCTTGATCTTGACTGGAAACACCGAGGTGAGATATTCTTAGCTCGGTGGGCTCACGATTCATCAGGACATCAAGGCAGAGATGCAACCTACCAGTGGGCTCGTGACAGATCCATAGACATTTCCATGGATGCTATCACACAAGTCATCCATGACTGTGACATTTGTGCTGCTATTAAGCAGGCAAAGNGANTTAAGCCCTTATGGTATGGTGACAGATGGTCCAAGTACAAGTATGGTGAAGCTTGGCARATTGACTACATCACTCTACCACGTTCTCGTTCTGGTAAGCAGTATGTGCTTACTATGGTAGAGGCAAACACTGGNTGGTTGGAAACTTATCCAGTTCCACATGCAACTGCACGCAACACCATTCTTGGTCTGGAGAGACAAATCCTGTGGAGACASGGAACTCCAGAGAGGATTGAGTCAGACAASGGAACTCAYTTCAAAAACAACCTTGTAAAGAGCTGGGCCAAAGAGCACGGCATTGAGTGGATATTCCACATTCCCTACTATGCACCAGCTGCAGGGAAGATTGAACGCTACAACGGTTTGMTGAAGACCACTCTTAAAGCCATGGGGGGTGGATCTTTGAAAAACTGGGAAAANCATTTAGCACAAGCAACCTGGCTGGTAAATAGTAGAGGTTCAGTGAACCGAGCTGGACCSGCACACTCAGATCTGCTACAGAAAGTAGAAGGTGATAGAGTTCCTGTTGTTAGAGAAAAGAATCTGTTAGGTAAAACTGTTTGGGTATTTTCTCCCTCAGGAGAGGCTAAACCTGTCMGAGGGGTGGTTTCAGCTGAAGGTCCKGGTCACACTTATTGGGTAATGCAAGAGAATGGTGAAATTCAGTGTATTCCACAAAGAAATMTAACTTTAGCTGAAAGAGWTTAATKTCAGAGTGTTGTACAGCTACATCGCGCCCAAAGGAAGAATCCTTGAGGAATCCACGGTGCACSAA
>GGERVL-C-cAur#LTR/ERV3
GAGAAGGGCGTTTCAAAGACCCTAAGGTTACAAATGGGCTTTTGGAGTAGCATCTGTAGAAATTGATGGACAAAAACTGAAGCTGTCTGTTAGACCTGAWCTTTCTGATGAATCTGCAGTTGTGGGACAACACAAGATTGAGGACATTAAATTGCCSGTTGCTTCTCAGACTGTGCATCACAGACAATACAGAACCAACCNTGACTCTTTGTTGCCCATTCAGAATCTGATTCGTCAGTTGGAGAGTCAGAAAGTCATCAGCAAAACTCATTCMCCTTTCAACAGTCCAGTGTGGCCTGTGCGAAAGCAGAATGGAGACTGGCGTCTGACAGTCGACTACCGAGCYCTGAATGAAGTAACTCCACCTATGAGTGCAGCAGTACCAGACATGATGGAACTCCAGTATGAGCTGGAATCCAAAGAGGCCAAATGGTATGCTACCATAGACATTGCTAATGCCTTCTTCTCTATTCCCATAGCAGAGGAATGCAGGCCTCAGTTTGCTTTCACCTGGAGAGGAATCCAGTACACTTTCAACAGATTGCCAATGGGCTGGATYCACAGCTCCAGCATCTGTCATGCAGTGATCCACGATGCTCTGGAGAAAGGTGGTGCTCCAGAACACATCCAGTTCATCGATGATATCATCGTCTGGGGTAAAACTGCTGAGGAAGTCTTCGAGAAAGGTAACAAAGTCATTGACATTCTTCTGAATGCAGGTTTYGCCATCAAGCGAGACAAGGTGAAAGGACCTACCAGAGAGATCCAGTTTCTGGGAGTGCGGTGGCAGGATGGACGCCGACACATTCCAGTGGATGTGGTAAATAGAGTCTCTACCATGGCNAATCCCATGAACAAGCAAGAAACTCTACGTTTCTTGGGGATAGTGGGATTTTGGAGACTGCACATTCCTGGATACAGTCAGATTGTGAAACCTCTGTATGATGTGACTCGAAAGAGAAACAATTTCCACTGGGGACCTGAACAACAAGCAGCYTTTGACCAGATAAAGCAAGAGGTGGTTCAAGCAATGGGTCTGGGACCTGTCCGAGATGGTCCAGACATTAAGAACATTTTGTACACGGCTGCAAGTGACAATGGTCCAACCTGGTGCTTGTGGCAAAGAGCTCCAGGTGAGACACGTGGACGACCTCTTGGTTTYTGGAGTAGAGGTTACAGAGGTTCAGAGGCTAATTATACTCCAACAGAGAAAGAGATTCTAGCTGCCTATGAAGGAGTAAAAGCAGCTTCTGAAGTGATTGGAACTGAATCACAACTTCTCTTAGCTCCCAGATTACCAGTTTTGAATTGGATGTTCAAAGGCAAAGGTTCCACACCACATCATGCAACAGAYTCCACCTGGTCTAAGTGGATGGCTCTGATAACACAGAGAGCTCGAATGGGAAATCTTGAAAGACCTGGTCTGGTGGAGGTGATCTCAAGTTGGCCTGAAGGTACCAACTGYACTAAACCTCCAGAGGAGAGAGTAACTCGTGCTGAGGAAGCTCCTCCTTACAATGACCTTTCTGATGATGAAAAGAAATATGCTTTGTTCACAGACGGTTCCTGTCGTCTWGTCGGGAACAAGCGAAGGTGGAAGTCTGCAGTGTGGAGTCCAACACGCCGAGTTGCAGAGGCAAAGGATGGAGAAGGAGAATCCAGTCAGTTCGCAGAGGTAAAAGCTGTCCAGCTAGCTCTCGACGTAGCTGAACGTGAGAGGTGGCCAAAGCTTTATCTCTACACCGACTCATGGATGGTAGCCAATGCTCTGTGGGGTTGGCTAAAGAACTGGAANAAGARTGGTTGGCAGAGAAAAGGAAAGCCTATWTGGGCAGCTGACCTGTGGCAGGACATTGCTGATCGAATCGAGAGAATTCCAGTGAAGGTGAGACACATTGATGCTCACATCCCTAAGAGCAAAGCTACTGAGGAACAGCAACACAACCATCAGGCAGATCTAGCTGCAAGAGTTTCTCAAGTAGACATGGACTCTGATCTTGATCTCGACTGGAAACACCGAGGTGAGATATTCTTAGCTCGGTGGGCTCACGATTCGTCAGGACATCAAGGCAGAGATGCAACCTACCAGTGGGCWCGTGACAGATCCATAGACATTTCCATGGATGCTATCACACAAGTCATCCATGACTGTGACATTTGTGCTGCTATTAAGCAGGCAAAGCGACTTAAGCCCTTATGGTATGGTGACAGATGGTCCAAGTACAAGTATGGTGAAGCTTGGCAGATTGACTACATCACTCTACCACGTTCTCGTTCTGGTAAGCAGTATGTGCTTACTATGGTAGAGGCAAACACTGGATGGTTGGAAACTTATCCAGTTCCACATGCAACTGCACGCAACACCATTCTTGGTCTGGAGAGACAAATCCTGTGGAGACACGGAACTCCAGAGAGGATTGAGTCAGACAACGGAACTCATTTCAAAAACAACCTTGTAAAGAGCTGGGCCAAAGAGCACGGCATTGAGTGGATATTCCACATCCCCTACTATGCACCAGCTGCAGGGAAGATTGAACGCTACAACGGTTTGCTGAAGACCACTCTTAAAGCCATGGGGGGTGGATCTTTGAAAAACTGGGAAAAGCATTTAGCACAAGCAACCTGGCTGGTAAATAGTAGAGGTTCAGTGAACCGAGCTGGACCTGCACACTCAGATCTGCTACAGAAAGTAGAAGGTGATAGAGTTCCTGTTGTTAGAGAAAAGAATCTGTTAGGTAAAACTGTTTGGGTATTTTCTCCCTCAGGAGAGGCTAAACCTGTCCGAGGGGTGGTTTCAGCTGAAGGTCCGGGTCACACTTATTGGGTAATGCAAGAGAATGGTGAAATTCAGTGTATTCCACAAAGAAATCTAACTTTAGCTGAAAGAGTTTAATTTCAGAGTGTTGTACAGCTACATCGCGCCCAAAGGAAGAATCCWTGAGGAATCCACGGTGCACGAACCCTGAGAACCCTGAGAGCCCTGAGTCAACTGAGAGTCCCTGTTTCCCTGTTTCCCTTTTCTTCGCTTCGTCTGCGAAGAGACAAACTGTTTTCCATTTTTCTTGTTTCTTGGACTTCTGAATCATCTACACCTGAGGATAGCCGGAATGGACTATGAACTTTACTTRCAAATTGTAGATATTGTTTTAGATTGGATGGACAGTATGAACAGCCAATGAAATTGTTTAGAAGAGGTGGATTGTGACCGGTTGAGGCTATGCCTTTAAGAAAGAGACAGTTGCTGAACACTCTGGCTGAATGTTTTTGATATTTGAACAAAAACAAGATAGTCTAAACTAATTTCATTGGTNGMTTGTAGRRTGCARTTTTRAGTTTGGGTTCTGTTAGTTCAGTCTGTGTCTGGTCTGGGTTCAGGCTGGGTGCAGTCTGTGCTTCTCTGTCCTGTGGGCTGGANGGYTTCTCTCTTTCTGAAGCAGGAACGGCCTTGAGTTAACAGCTAACCAGATAAGAAAACTAATTCTTGCATGYGCTTTTNAGCTAACAGAATTTTTCTTCCTTAATTGCCTTTCTCTCTCTCTCTAACCCTTTTTGGGAAAAAGGGGAGGTGGGGAGGGAGAGAGGGGGGTTCAGGGAACCCCCCTGGCCGGCTGGAGGGAAAAGGYTTTTCTGCATTGTGTTCATTGCTGTATWTTYCTGTATATATTGTAAATATTGTATATTTGTGTACATATTCATTGCATTCCATTTMTGCYTGTAAATATAGCTTTCATCTGCTTTTCCGACTGAGCTAGCTGTGGTTTCTTTCCYTGTGTGTGGGGAGGGAACTTTCTCACCCCACCACA
